# Supplementary material for: Widespread signatures of recent selection linked to nucleosome positioning in the human lineage
Source: HighWire-hosted journal article supplement (doi:10.1101/gr.122275.111), 2011-09-08
Supplement: SupTable1.xlsx [file SupTable1.xlsx]

## Sheet: Schones Intraspecies
	Ancestral base count				Base change count (ancestral->current)
Position	A	T	C	G	T->A	T->C	T->G	C->A	C->T	C->G	G->A	G->T	G->C	A->T	A->C	A->G
-500	220602	221181	170379	170952	111	412	116	133	557	144	588	164	121	113	108	399
-499	220648	222468	169169	170783	94	457	113	145	558	117	589	142	133	99	102	408
-498	219963	222611	169536	170924	105	426	135	153	563	101	581	134	135	108	124	400
-497	220506	221833	169805	171052	102	428	104	151	548	129	592	149	135	102	108	453
-496	219838	221934	170326	171263	115	413	114	139	611	145	585	139	143	98	119	419
-495	221277	221498	169819	170688	106	406	109	155	568	121	606	141	134	110	116	415
-494	219999	222310	169247	171531	89	426	105	110	589	125	597	130	142	112	102	373
-493	219939	221367	170596	171299	110	410	116	144	602	149	589	148	126	119	117	433
-492	220287	222089	170414	170359	108	429	127	130	617	118	623	154	119	92	139	441
-491	221271	220910	170295	170479	97	424	113	112	559	134	583	157	115	89	116	419
-490	220825	221191	170538	170501	99	411	124	143	581	132	593	129	121	85	115	371
-489	220597	221497	169740	171318	103	413	117	132	569	126	569	141	120	92	107	422
-488	220604	221226	170856	170448	99	471	117	137	583	116	603	151	127	141	108	416
-487	220209	221948	171109	169813	103	466	102	148	583	113	606	141	133	111	131	427
-486	219765	221936	170493	170964	99	416	111	106	574	116	579	128	135	98	124	411
-485	219859	221897	170321	171258	97	397	130	152	594	140	566	140	133	121	114	457
-484	220124	221776	170319	171027	117	440	111	155	573	132	558	137	130	106	146	446
-483	220060	222210	170171	170746	101	408	114	129	589	155	587	127	152	111	101	405
-482	220262	221463	170515	170801	98	408	100	149	559	118	572	163	115	118	121	411
-481	219813	221920	170627	170932	118	430	104	129	640	117	622	147	152	110	114	426
-480	219872	221543	170591	171057	105	377	116	147	554	132	598	150	121	92	133	376
-479	220387	221213	170480	171012	110	389	114	143	573	144	606	152	140	93	121	435
-478	219530	221362	170548	171642	111	427	115	128	599	128	620	167	143	104	107	398
-477	219987	221082	171176	170749	92	413	120	147	558	150	599	129	139	100	110	416
-476	220152	221380	170614	170916	106	429	118	125	566	134	588	141	148	107	128	407
-475	219923	220956	170895	171515	98	429	104	142	591	125	628	139	105	107	132	456
-474	220211	222220	170189	170502	116	410	107	123	617	131	594	130	137	99	102	428
-473	220073	221296	170593	171300	113	430	108	140	588	147	601	158	140	122	112	406
-472	219318	221439	170791	171610	96	426	122	146	570	130	564	135	131	106	104	419
-471	219425	221691	170796	171396	99	420	112	147	594	120	622	158	114	120	136	380
-470	219807	221165	171077	171207	96	402	125	143	549	151	618	148	116	93	123	412
-469	219241	221986	171025	171147	116	384	128	138	561	118	546	157	127	102	119	450
-468	219754	221356	171133	170940	113	411	96	157	612	127	589	132	147	103	116	401
-467	219120	221248	170989	172006	105	416	116	169	557	146	590	147	138	104	101	402
-466	219824	221589	171177	170570	122	409	118	127	564	133	557	144	136	103	122	417
-465	220301	220507	171428	171182	100	429	118	142	627	111	607	146	126	107	109	440
-464	219351	221018	171291	171586	118	417	100	154	575	137	647	149	145	94	134	431
-463	219560	221131	170984	171670	121	453	98	131	617	130	591	135	131	106	121	398
-462	219427	221817	170347	171667	101	409	114	121	562	131	617	131	132	97	123	408
-461	219281	220986	171818	171248	98	459	111	149	588	139	643	132	133	112	99	414
-460	219675	221019	171275	171307	107	399	111	162	644	117	595	133	144	116	127	448
-459	219693	220990	171724	170786	103	409	115	143	568	155	572	152	130	104	94	396
-458	219267	221474	171638	170919	108	421	111	144	611	143	627	140	107	102	114	388
-457	220071	220786	171616	170855	110	414	123	139	618	130	598	152	142	105	138	421
-456	219695	221456	171222	171111	94	438	125	152	607	110	583	143	129	110	111	405
-455	220341	220330	171200	171654	96	427	120	129	586	123	614	154	113	99	119	473
-454	220525	220539	171172	171281	103	395	111	145	625	155	582	147	130	98	109	428
-453	220761	220684	171156	170788	111	417	128	139	615	119	597	131	133	122	111	377
-452	220039	220600	171192	171424	100	387	95	137	605	133	586	162	126	111	121	414
-451	219353	221012	171227	171924	104	432	121	138	603	115	587	128	129	118	116	425
-450	220010	221627	171144	170728	113	413	120	146	612	121	604	122	131	119	114	390
-449	219396	220263	171815	171863	99	412	108	149	579	119	585	141	122	125	116	381
-448	220324	220908	170939	171351	97	382	120	172	601	137	629	162	133	109	102	404
-447	219844	220633	171433	171377	94	421	99	152	565	140	590	124	146	100	109	410
-446	220385	220953	170811	171221	102	410	119	141	568	121	620	149	138	99	124	399
-445	219746	220128	171262	172145	146	419	134	157	593	143	610	148	133	101	99	392
-444	219884	220222	171791	171621	116	401	113	161	626	118	659	125	142	95	112	443
-443	220045	220180	171428	171821	110	407	110	131	650	116	610	119	131	107	123	431
-442	220630	219245	171434	172143	92	406	93	148	593	144	598	146	121	97	110	428
-441	219714	220282	171505	171878	88	426	112	132	602	135	625	159	149	112	116	428
-440	220385	219883	171584	171659	84	421	133	122	543	118	599	132	146	104	104	432
-439	220423	219623	172317	171340	122	418	126	127	584	142	584	157	139	108	117	406
-438	219609	220073	172078	171756	95	377	131	151	610	142	596	133	130	104	118	418
-437	220289	220986	171367	170936	100	411	112	150	619	145	550	146	143	102	115	444
-436	220755	219374	171926	171473	88	420	112	155	582	111	603	145	133	98	104	449
-435	220298	220826	171015	171354	91	404	117	133	573	129	627	155	137	100	125	429
-434	220370	220457	171501	171184	106	430	113	116	568	139	604	156	128	99	115	398
-433	220140	220680	171031	171681	103	447	134	123	587	126	588	162	144	88	127	414
-432	219596	220966	170803	172143	105	452	124	152	544	140	574	145	144	82	122	416
-431	219839	220952	171485	171431	95	401	117	125	608	112	619	140	141	104	112	388
-430	220722	219945	170898	171917	97	431	96	143	612	139	604	147	114	105	122	417
-429	220812	219792	170715	172089	105	428	124	140	582	136	581	137	120	98	129	456
-428	221050	219639	171458	171456	101	421	116	135	597	145	608	128	119	118	100	417
-427	220595	220077	171010	171734	105	401	116	141	588	156	573	134	131	103	106	402
-426	220382	220067	171259	172074	93	444	137	142	576	133	592	132	139	93	99	418
-425	221784	220309	170591	171010	100	448	149	137	609	135	556	127	126	96	123	415
-424	220810	220115	170553	172020	97	395	108	124	569	124	596	142	133	87	93	376
-423	220217	220061	171111	172303	111	414	113	150	593	136	551	135	124	90	104	412
-422	220996	220326	170285	172115	110	436	131	172	590	124	610	121	133	98	114	375
-421	220895	220590	170456	171820	87	378	108	152	554	139	620	144	146	101	136	415
-420	221148	219800	170497	172422	104	411	129	159	584	135	631	152	129	111	99	425
-419	220963	220239	170901	171684	120	410	110	140	642	140	598	152	129	97	113	411
-418	220536	220242	170938	172090	113	426	105	145	606	106	600	174	135	98	115	413
-417	220615	220313	171445	171455	103	377	119	148	608	123	650	131	151	97	110	417
-416	220788	220460	171099	171346	96	442	99	150	606	127	612	132	147	102	106	413
-415	220566	220538	170413	172363	116	389	110	147	585	132	607	138	136	115	131	397
-414	221644	219840	170032	172315	122	411	120	133	596	123	593	134	123	92	118	401
-413	220714	220468	170767	171846	110	438	110	173	608	151	625	150	123	113	103	420
-412	220995	220344	170440	172306	99	403	112	146	654	133	572	137	134	89	111	435
-411	220771	220550	170161	172673	101	381	138	143	617	155	648	165	142	94	109	407
-410	221301	220032	170899	171752	103	434	97	129	614	138	621	144	144	100	126	422
-409	221551	218804	171935	171864	103	434	117	137	599	161	586	148	132	115	102	453
-408	221247	220228	170545	171846	86	400	111	151	597	134	572	141	139	112	105	404
-407	221107	219974	170648	172208	101	423	108	132	593	141	585	129	140	84	125	428
-406	221465	219294	171367	171950	96	419	106	154	547	150	581	134	139	104	103	427
-405	221384	220061	170279	172182	93	405	134	122	596	130	616	135	134	120	120	476
-404	221169	220462	170290	172156	91	434	123	135	587	125	555	133	155	109	132	406
-403	221078	219944	171249	171689	103	423	118	161	627	131	599	148	118	91	120	420
-402	221514	220395	170831	171369	121	411	105	135	601	130	598	159	128	118	133	427
-401	221588	220103	170674	171681	108	402	127	130	592	126	553	164	125	89	114	443
-400	220999	219463	171440	172190	113	412	108	145	567	121	551	131	142	104	124	387
-399	221702	219651	170538	172024	126	431	115	121	542	130	686	130	146	95	127	409
-398	221216	220522	170128	172392	106	380	116	151	559	125	649	144	132	110	128	424
-397	221365	220409	170354	172031	101	401	113	178	620	110	592	135	117	111	110	424
-396	221389	220541	170143	172038	95	381	124	132	590	140	632	135	135	95	123	413
-395	222148	220175	170552	171451	94	433	103	149	595	133	621	137	127	111	123	397
-394	221987	220357	170308	171705	87	419	110	168	582	116	589	163	136	91	108	428
-393	222271	219682	170181	172084	115	390	124	127	623	136	578	166	138	108	127	396
-392	221983	219905	170218	172165	102	399	92	133	586	150	587	123	125	106	124	404
-391	221919	219929	170220	172107	106	430	112	147	600	133	608	150	140	126	123	411
-390	221891	220259	170862	171179	94	387	120	146	590	139	526	160	125	102	95	446
-389	221872	219805	170953	171674	90	368	119	133	633	140	592	154	137	94	101	441
-388	221451	220034	170453	172468	82	386	109	153	558	119	571	141	127	104	106	415
-387	222218	220348	170612	171214	106	395	125	130	585	121	592	158	122	108	111	415
-386	222111	220023	170293	171962	104	418	119	144	575	131	591	142	120	92	109	451
-385	221996	220858	169348	172202	105	420	120	144	575	128	592	163	132	101	133	408
-384	222513	219505	170311	172017	97	440	104	157	605	130	586	139	140	101	115	383
-383	221248	220444	170620	171907	95	426	104	160	604	151	571	176	153	91	126	396
-382	223032	219619	170415	171432	115	407	106	154	573	113	581	125	113	99	145	427
-381	221902	219990	170811	171768	89	396	109	141	588	124	600	143	135	114	121	364
-380	222632	219779	170383	171449	105	421	111	148	578	150	588	145	131	97	120	451
-379	222525	219877	169971	172070	96	421	116	164	584	161	590	158	124	111	119	419
-378	222897	219934	170083	171488	105	389	114	128	570	143	620	122	146	96	119	418
-377	222303	220100	170315	171585	113	445	114	131	563	142	599	140	131	92	119	440
-376	222032	220214	170199	172040	103	395	110	137	562	138	621	131	124	118	108	425
-375	222875	220788	169603	171151	91	405	96	150	554	127	613	135	110	117	106	434
-374	223080	220461	170112	171032	115	421	114	131	604	128	594	141	146	100	108	399
-373	223198	220020	170553	170717	103	419	111	124	566	147	590	138	138	107	130	426
-372	222478	219197	170618	172249	101	417	118	125	610	126	562	131	120	94	116	398
-371	222863	220248	170135	171511	104	446	102	127	637	135	614	147	131	111	109	436
-370	222703	219684	170148	172195	96	372	116	137	576	112	610	131	119	100	115	420
-369	223457	218856	170315	172173	104	413	122	136	523	128	595	150	140	111	104	414
-368	223431	220180	170099	170842	104	393	119	132	558	122	582	143	133	103	80	405
-367	223168	219830	169933	171686	108	417	119	146	564	125	566	153	128	116	116	451
-366	223352	219582	170226	171504	101	385	96	147	589	152	556	138	156	109	108	409
-365	223587	220142	169721	171160	119	418	102	143	538	129	582	127	107	107	107	402
-364	223817	219214	169969	171822	90	403	121	123	566	133	575	124	126	92	107	417
-363	223352	219835	170064	171285	99	394	97	129	594	119	600	123	128	126	110	449
-362	223215	219818	169287	172252	98	392	111	141	622	118	635	146	116	98	122	395
-361	222784	220509	169406	172201	105	441	121	128	556	147	597	140	130	93	111	410
-360	223200	220138	169894	171593	93	400	114	100	577	127	569	132	143	116	109	457
-359	223214	220331	169878	171522	119	404	98	146	609	145	604	147	150	101	106	411
-358	223022	220379	169398	172082	110	405	108	150	535	132	570	143	135	96	139	438
-357	223229	219602	169838	172106	111	415	104	152	625	128	633	173	123	98	109	408
-356	223381	219389	170148	172000	90	382	101	137	614	143	530	141	135	118	123	422
-355	224382	219918	168983	171627	94	400	96	136	553	128	620	138	153	121	108	425
-354	223388	219686	169875	172191	106	412	101	138	609	143	558	156	143	99	129	442
-353	224182	219417	169552	171767	95	412	106	135	559	135	575	165	123	106	113	413
-352	224646	220068	169359	170776	116	446	129	149	591	132	605	154	119	97	128	409
-351	224505	218838	169595	172156	92	405	103	149	549	139	578	129	142	96	133	420
-350	224449	220335	169144	170995	86	419	104	128	561	144	603	148	123	114	111	445
-349	223990	220211	168902	171911	81	409	93	147	541	138	589	149	143	114	120	424
-348	223801	219863	169519	171934	100	392	95	136	612	132	595	134	130	101	108	402
-347	224322	219729	169981	171052	116	400	114	138	593	147	586	115	140	104	120	404
-346	224087	219866	169865	171213	113	391	120	125	572	130	578	140	151	107	100	457
-345	224376	219726	169757	171347	104	424	114	162	545	144	536	146	112	108	102	408
-344	224819	219109	169462	171636	107	433	111	113	602	126	611	132	139	89	139	431
-343	223645	220169	169443	171648	99	437	121	155	589	146	571	135	151	93	117	420
-342	224265	219881	169152	171740	92	421	107	119	560	127	601	159	115	93	120	448
-341	224503	219708	169312	171693	94	383	110	102	572	113	588	131	143	109	121	421
-340	223616	220079	169567	171970	108	399	124	145	578	123	614	158	121	105	110	423
-339	224635	219453	169327	171714	92	395	104	129	539	124	591	148	136	101	98	401
-338	224218	219550	169644	171804	122	427	119	147	574	137	579	112	134	108	105	443
-337	224153	219070	169880	171996	103	414	106	117	608	145	566	150	132	96	112	415
-336	223359	219932	169322	172419	109	391	115	151	583	128	596	144	158	90	125	406
-335	224499	218874	169243	172426	104	393	105	134	573	123	580	128	143	113	102	392
-334	224765	219520	169121	171679	109	420	115	140	559	136	604	158	138	77	109	410
-333	223650	219907	169610	172097	104	439	108	136	569	135	568	149	139	115	105	442
-332	223102	219775	169582	172456	99	424	113	125	549	139	601	129	154	104	98	443
-331	224473	220618	169061	171007	92	429	122	140	536	145	588	119	151	119	110	397
-330	223346	220311	169480	171950	95	412	112	127	582	117	580	141	132	117	97	440
-329	223674	219240	169758	172605	102	406	115	163	570	118	568	148	155	94	135	417
-328	223345	219535	169887	172455	122	396	118	129	579	144	554	129	119	103	119	393
-327	223178	220167	169884	172036	97	391	97	149	567	133	604	135	135	113	131	408
-326	223735	219717	170128	171598	125	388	102	146	629	154	567	133	127	125	118	413
-325	223657	220341	169347	172069	98	407	109	138	573	132	578	129	139	97	115	451
-324	224067	219652	169179	172380	107	415	111	150	572	111	577	152	142	106	107	398
-323	223263	219635	169830	172799	91	401	107	160	566	115	624	127	136	98	125	399
-322	223205	219649	170381	172122	77	386	112	158	553	129	559	131	113	117	104	441
-321	223520	219537	169666	172516	106	392	108	142	557	142	614	145	127	112	127	395
-320	223835	220457	169533	171550	96	427	102	149	582	132	606	139	145	98	108	398
-319	222967	219715	170230	172543	108	389	136	138	609	129	595	139	134	111	124	419
-318	223527	220438	169742	171688	111	398	120	138	529	112	571	162	127	108	110	427
-317	223019	220152	170569	171615	92	399	128	110	586	146	532	174	135	94	128	390
-316	223102	220298	170540	171403	137	440	100	124	554	127	598	136	147	104	115	420
-315	223140	219815	169617	172594	107	373	124	160	559	104	598	154	130	88	124	453
-314	222855	220044	169957	172527	98	438	120	142	577	126	588	138	113	85	92	401
-313	222862	219613	170909	172000	100	422	99	150	596	130	595	136	132	102	111	423
-312	222692	220135	170497	172093	97	418	101	157	547	135	608	137	155	92	105	421
-311	222549	220528	170281	172004	100	394	124	138	581	137	570	145	122	96	121	408
-310	223191	219010	170986	172291	78	421	125	130	606	139	604	129	116	105	113	406
-309	222274	219809	170757	172475	91	432	125	150	580	133	589	133	139	97	94	417
-308	223036	220036	170273	172164	115	432	112	124	583	109	624	162	143	89	107	392
-307	222318	219485	171230	172469	100	389	116	148	626	139	569	141	130	95	134	449
-306	222100	219954	170759	172447	98	380	111	135	579	155	584	156	115	81	116	407
-305	222408	220472	169926	172845	85	389	122	124	551	140	606	137	141	100	122	408
-304	221870	219470	172009	172053	106	382	120	136	535	122	606	147	140	101	115	416
-303	220954	221096	171513	171877	92	416	121	135	571	139	595	143	111	97	122	421
-302	221792	220552	171829	171355	103	397	97	127	608	126	564	145	139	114	119	422
-301	221820	220654	171276	171907	87	389	97	150	614	135	579	136	146	93	116	434
-300	222050	220720	170928	171729	94	413	117	154	566	130	629	144	128	95	116	397
-299	221222	220609	171190	172458	120	428	111	151	617	135	574	130	146	103	125	419
-298	221502	221034	171382	171489	98	401	111	138	586	143	600	132	143	107	110	407
-297	220624	221081	171445	172375	111	444	105	144	591	122	606	141	127	95	124	395
-296	221179	220991	171556	171645	84	409	106	158	595	145	586	136	132	89	138	433
-295	220827	220631	171394	172445	102	443	104	128	596	151	583	133	141	80	96	466
-294	220920	220821	171712	171960	98	422	111	128	611	136	613	118	139	102	105	389
-293	221432	220862	171929	171180	102	424	116	142	585	130	574	136	126	96	128	423
-292	220649	221293	172081	171367	97	392	118	142	564	164	560	151	152	94	114	417
-291	219838	220954	172316	172461	80	427	98	139	618	124	606	115	136	98	105	408
-290	220629	220858	171947	171920	104	408	103	135	559	144	613	138	128	102	101	435
-289	220466	221158	171687	172310	107	417	124	140	614	137	597	166	146	95	106	418
-288	220694	221236	171542	171825	118	405	131	141	601	134	573	129	149	92	123	421
-287	220606	221317	172414	170984	103	404	124	136	611	146	577	136	147	97	114	406
-286	220918	220565	171947	171877	93	374	123	154	629	137	625	133	142	105	120	443
-285	220862	220792	171788	171985	112	361	98	132	586	147	597	137	136	94	116	432
-284	220261	221587	171647	171872	101	428	117	150	600	108	627	176	112	106	108	420
-283	220430	220921	172103	172152	97	431	122	137	603	138	581	133	143	101	94	390
-282	220510	221237	172081	171383	104	418	115	136	562	143	557	149	158	108	126	456
-281	220359	221265	172182	171507	89	366	117	139	573	122	561	135	167	95	92	419
-280	220810	220861	172055	171682	106	396	106	147	570	131	558	146	127	106	90	420
-279	219165	221397	172289	172527	112	453	125	142	615	138	599	137	132	109	110	452
-278	220481	221600	171725	171621	95	432	127	146	593	142	589	126	135	110	110	442
-277	219054	221557	172307	172215	90	425	110	163	588	127	600	129	140	113	119	404
-276	220357	221077	172207	171601	94	411	105	149	590	125	607	134	126	108	112	441
-275	220056	221279	171976	171892	97	429	109	163	566	158	590	147	139	86	103	448
-274	220047	220671	172866	171886	101	413	116	153	583	141	591	133	139	108	108	439
-273	220133	221449	172445	171370	111	415	117	137	577	137	593	141	121	101	117	393
-272	220659	220786	172532	171424	119	408	116	151	616	112	567	149	148	93	129	410
-271	220564	220958	172390	171778	92	428	106	141	566	142	592	153	139	107	122	390
-270	220705	221165	172278	171379	88	386	115	153	600	120	559	125	136	93	111	416
-269	219951	221158	172689	171543	109	404	98	142	602	153	557	136	144	88	98	414
-268	220856	221090	172097	171340	90	410	129	135	569	127	573	135	125	110	117	419
-267	220051	221129	172700	171370	91	444	113	157	578	153	606	137	144	90	126	406
-266	220586	220677	172880	171400	119	398	121	153	601	143	583	173	124	102	117	429
-265	220079	220879	172309	172173	121	408	120	152	627	149	582	134	126	101	129	435
-264	220189	221298	172581	171547	93	429	105	149	578	150	589	124	124	103	116	392
-263	219538	221148	172481	172192	100	447	106	143	607	137	607	144	152	101	123	431
-262	220691	220713	172072	171735	99	437	103	135	597	135	550	134	139	110	105	431
-261	221091	220489	172159	171613	114	374	105	147	601	135	621	138	127	89	121	417
-260	219847	220567	172471	172524	99	405	121	155	563	151	555	139	119	102	129	415
-259	221256	220437	172010	171787	111	372	102	141	595	123	596	139	150	99	133	387
-258	220889	221209	171766	171497	111	409	112	139	556	131	594	161	144	108	138	392
-257	221420	220008	172022	171760	95	403	107	147	544	154	597	146	132	91	114	429
-256	220625	220770	172145	171804	107	375	123	126	601	120	566	145	133	119	116	398
-255	219950	220894	172399	172047	104	396	110	147	582	135	590	138	117	79	118	405
-254	220515	221110	171987	171919	92	379	111	136	595	151	579	149	123	126	137	401
-253	220909	220334	172217	171989	78	385	115	130	576	122	594	128	166	88	120	436
-252	221388	220908	171846	171260	108	440	90	140	599	124	608	144	146	104	116	415
-251	221549	220494	171482	171906	101	375	138	132	593	122	649	135	127	110	117	423
-250	220897	220461	171512	172494	105	424	104	132	619	150	624	141	138	90	96	424
-249	221063	220562	171539	172462	103	434	104	155	608	124	607	137	139	102	104	414
-248	220740	220334	172084	172280	95	410	110	148	600	137	616	107	136	113	92	426
-247	220976	220489	171920	172313	115	389	107	152	574	122	584	167	141	98	119	410
-246	221704	220183	171509	172352	87	427	116	140	551	163	569	137	131	114	97	425
-245	220981	220038	171681	172901	115	399	101	161	588	128	622	143	122	122	106	402
-244	221709	219670	171262	172832	110	435	95	157	585	133	575	168	136	114	117	449
-243	221833	220022	170836	172813	103	420	117	118	586	152	615	130	140	95	104	460
-242	221767	220329	171154	172284	85	381	111	167	595	118	547	147	140	107	120	412
-241	221896	219969	171107	172723	118	423	105	133	579	126	647	141	161	107	98	427
-240	221879	220180	170833	172650	90	397	115	131	569	133	598	148	135	92	121	443
-239	222068	219818	170671	172955	129	452	117	147	592	134	594	167	143	124	125	424
-238	222371	219823	170859	172466	115	400	86	134	545	137	603	136	150	92	115	431
-237	222764	219919	170180	172705	91	431	113	109	579	133	578	121	136	100	119	436
-236	222276	219207	171048	172794	96	394	99	145	598	128	528	136	131	105	121	430
-235	222155	218952	171501	173022	88	392	111	151	519	150	561	127	150	131	130	431
-234	222051	219440	170875	173260	99	407	114	137	552	134	571	127	164	93	113	409
-233	221494	220717	170883	172731	100	419	130	170	522	132	555	152	147	100	147	407
-232	222128	220320	169917	173242	125	388	116	140	551	123	559	153	141	103	104	424
-231	221880	219547	170683	173682	96	408	105	131	615	138	618	144	143	88	107	404
-230	222082	219516	170708	173469	106	426	109	154	541	153	609	126	144	93	110	416
-229	221983	219907	170407	173495	103	430	103	150	574	142	596	170	121	109	117	411
-228	221688	219323	170767	174083	92	428	110	162	596	135	591	142	123	114	111	399
-227	222155	219294	170689	173639	111	417	121	156	555	155	591	136	142	119	119	403
-226	222089	219403	170528	173758	102	440	97	128	567	129	627	155	149	111	100	427
-225	222044	218917	171122	173628	108	429	112	159	595	131	598	147	121	103	132	405
-224	221429	219544	171183	173686	89	418	100	136	627	113	617	150	116	102	117	420
-223	222167	219526	170407	173848	112	418	106	140	582	133	590	134	169	92	120	424
-222	221845	219630	169962	174467	95	410	107	148	576	144	579	152	139	105	110	404
-221	221547	219706	170834	173835	91	393	108	148	578	132	612	144	150	98	125	402
-220	222042	219761	170668	173449	95	423	122	139	597	148	563	137	140	104	138	423
-219	221484	219747	170745	173834	94	416	135	150	570	125	593	135	148	99	125	403
-218	221740	220160	170759	173259	91	407	97	141	555	148	599	154	126	117	107	408
-217	222598	219898	170475	173089	93	411	95	122	609	150	607	134	137	94	128	408
-216	221974	219439	170837	173829	103	438	126	144	611	121	577	137	145	88	109	452
-215	222369	219721	170285	173795	110	413	122	151	560	127	581	152	144	98	100	412
-214	222484	219239	171205	173212	100	414	104	144	605	122	585	158	126	108	111	417
-213	222127	219614	170635	173708	107	400	114	141	571	156	567	123	132	97	118	416
-212	222375	219351	170516	173971	109	371	117	148	587	141	569	127	138	116	120	425
-211	222102	219219	170776	173967	102	411	99	136	539	145	614	145	139	109	106	396
-210	222680	219675	170222	173683	80	394	130	143	577	138	588	138	151	114	130	424
-209	222432	219445	170506	173879	115	416	100	143	584	126	597	156	132	107	118	411
-208	221993	219423	170856	173734	119	393	101	146	592	135	566	139	136	93	115	417
-207	222543	219002	170807	173926	93	386	114	120	573	125	578	166	117	123	109	415
-206	222366	219114	171319	173365	93	395	137	161	576	158	578	159	154	110	125	436
-205	222319	220033	170715	173125	113	401	116	154	560	127	569	110	127	87	108	441
-204	223238	218897	170281	173679	94	423	99	121	552	129	583	130	139	108	105	429
-203	222166	219500	171130	173655	96	426	111	161	581	123	610	160	138	108	112	420
-202	222320	219760	170713	173513	90	443	100	135	567	139	630	150	136	85	114	439
-201	222324	219639	170784	173605	103	394	128	134	561	130	624	140	119	91	106	409
-200	222991	218732	171532	173062	105	453	123	135	543	130	546	140	138	69	111	403
-199	222475	220267	170693	172836	103	378	109	131	546	129	567	150	138	94	124	407
-198	221948	219958	171323	172888	96	413	124	142	590	144	558	145	123	91	121	423
-197	222015	220151	171418	172748	104	424	107	150	563	131	550	145	160	104	119	413
-196	222276	219975	171002	172956	101	386	97	150	572	142	587	150	144	103	116	425
-195	222264	220656	170380	172923	89	389	106	137	564	132	597	131	144	100	124	406
-194	221770	220495	171091	172884	105	368	108	136	557	136	577	148	126	95	121	413
-193	222558	220082	170812	172982	100	421	95	134	569	132	586	133	135	88	125	380
-192	222796	219962	171198	172380	113	434	110	131	588	149	522	147	115	98	109	406
-191	222600	219944	170954	172973	105	413	132	121	586	132	599	141	150	101	130	392
-190	223256	219868	170753	172523	92	395	113	122	530	139	607	152	139	86	126	417
-189	222838	219982	171080	172377	121	408	111	147	554	137	563	108	135	86	112	387
-188	223025	220300	171063	171884	102	412	107	134	596	156	572	144	151	87	116	445
-187	223747	219550	170970	172195	89	433	115	148	563	131	614	152	140	100	110	413
-186	222576	220487	170704	172824	106	378	109	126	537	137	555	161	134	88	115	406
-185	223315	220556	170479	172175	88	387	115	161	529	108	602	138	135	90	125	416
-184	223215	221029	170035	172169	96	445	92	144	581	130	590	122	125	97	128	408
-183	223491	219650	171439	171828	113	425	113	137	556	145	582	141	129	110	128	420
-182	223109	220985	170870	171579	120	388	104	124	581	140	552	157	136	105	94	386
-181	223101	220638	171116	171687	114	403	129	136	569	140	581	131	130	97	110	422
-180	223326	220503	170533	172253	104	434	110	143	586	137	613	184	142	110	93	409
-179	223562	220438	170632	171844	88	414	140	151	586	138	620	143	117	116	99	427
-178	223617	220083	170972	171841	116	389	102	120	560	141	557	153	128	105	111	415
-177	223833	220512	170159	172093	93	402	106	137	561	144	574	147	150	83	114	437
-176	224156	220345	169971	172043	100	406	98	114	575	132	577	149	133	85	128	442
-175	223729	220640	170656	171716	100	364	92	149	520	120	551	162	131	107	114	404
-174	224511	220685	169971	171387	86	390	98	142	567	152	575	138	134	99	132	421
-173	223546	220728	170346	172054	92	388	98	142	572	132	560	140	129	87	125	387
-172	223882	220622	170173	171933	90	406	114	137	588	125	570	144	137	106	101	407
-171	223486	221153	170628	171431	109	382	90	156	557	154	600	140	121	105	116	400
-170	224097	220498	170589	171518	85	425	114	157	533	141	590	128	131	96	107	413
-169	224232	221230	169830	171693	103	454	94	140	546	135	599	142	140	113	128	374
-168	224239	220656	169851	172034	113	387	109	141	556	154	579	153	150	100	118	422
-167	224528	221075	169659	171423	93	394	111	169	555	123	592	164	129	87	111	430
-166	224967	221135	168938	171739	107	374	107	160	548	119	558	139	146	96	122	440
-165	224446	220562	170098	171625	96	430	107	137	625	128	562	144	146	97	114	408
-164	224463	220486	169699	172055	100	411	109	129	554	139	562	148	127	106	104	435
-163	224616	220680	169699	171585	92	419	99	134	568	139	562	118	139	119	89	410
-162	224941	220755	169103	171843	100	403	102	145	582	137	555	147	129	95	124	417
-161	225020	220580	169659	171760	90	443	116	139	530	143	590	154	126	115	124	413
-160	224913	221214	169793	170980	96	381	119	145	571	129	579	128	140	105	109	440
-159	224862	220053	169616	172287	97	432	121	120	553	126	587	125	138	113	124	374
-158	224987	220327	169628	171908	104	398	121	129	558	135	624	134	129	107	113	433
-157	225530	220605	169260	171411	92	423	122	119	569	130	550	123	120	112	122	439
-156	225131	220685	169793	171336	98	417	108	122	561	144	573	143	132	102	109	408
-155	225400	220542	169114	171896	101	401	116	130	547	145	593	129	142	107	127	420
-154	225890	220614	168685	171827	109	428	99	134	559	150	568	139	140	100	111	416
-153	225190	220947	168697	172113	87	427	107	142	536	138	611	136	145	99	121	412
-152	225667	220870	168295	172033	85	409	117	152	557	128	571	147	144	99	120	463
-151	225757	220628	168180	172232	88	403	111	146	540	137	592	149	137	90	110	399
-150	226026	219916	168779	172232	84	383	111	132	588	139	606	139	137	114	124	449
-149	226572	220509	167988	171903	103	433	115	150	576	127	566	147	130	106	123	449
-148	226872	219981	168359	171640	114	441	129	155	529	133	551	144	129	116	123	426
-147	226685	220178	167956	172149	102	374	92	117	567	149	564	166	147	100	96	434
-146	226638	219741	168144	172546	97	435	97	146	555	140	557	154	147	112	117	431
-145	226787	219468	168451	172282	85	406	98	129	573	121	565	147	137	89	123	412
-144	226220	219944	168293	172509	107	409	114	133	559	139	559	145	153	98	113	402
-143	226151	220896	167579	172573	91	422	113	136	531	122	559	135	154	110	112	436
-142	226912	219512	167598	173033	111	371	116	125	550	116	558	130	132	111	125	428
-141	226842	219651	167998	172367	93	409	121	144	574	107	586	145	135	88	118	398
-140	226897	219559	167803	173016	99	383	104	150	544	139	571	135	129	94	102	353
-139	227393	219831	167178	172608	97	407	98	147	570	143	578	138	129	105	100	429
-138	227306	219630	167553	172600	107	405	117	152	567	127	573	125	136	115	113	456
-137	227088	219278	168183	172583	104	374	109	130	557	144	540	141	134	90	112	415
-136	227988	219283	167357	172552	100	397	107	123	539	121	555	144	130	103	117	435
-135	227147	219177	167832	173096	99	400	93	142	510	137	590	116	145	88	109	423
-134	227593	219150	167616	172764	102	359	99	127	561	141	604	161	135	99	110	423
-133	227161	219497	167471	173034	121	444	110	133	580	119	579	149	144	108	116	405
-132	227174	219584	167358	173132	112	417	109	148	515	121	544	152	120	82	124	412
-131	227496	219352	167425	172913	86	409	143	153	558	140	590	135	140	101	122	436
-130	227521	219873	166965	172892	102	400	116	125	544	126	556	142	137	102	119	399
-129	227513	219485	167306	173022	103	453	141	146	555	125	552	151	142	108	117	425
-128	227295	220357	166841	172790	108	398	91	141	527	130	569	150	121	118	126	397
-127	227587	219181	168257	172436	94	428	117	140	535	133	562	139	138	97	124	383
-126	228413	220005	166973	171822	96	380	118	141	538	132	575	138	143	96	106	465
-125	227875	220324	166928	172016	84	384	104	158	578	147	526	123	141	91	127	454
-124	227481	220679	167149	172104	93	377	117	134	566	110	564	126	99	107	107	395
-123	228599	220893	166600	171315	91	385	108	129	593	125	579	147	118	100	109	371
-122	228322	220103	166731	172220	97	360	132	128	569	143	565	153	127	81	115	423
-121	228979	219834	166129	172521	95	395	114	133	589	132	551	143	136	109	102	412
-120	228334	220653	165702	172742	102	405	107	130	522	140	557	133	123	105	99	409
-119	228978	219620	166066	172693	94	407	125	145	518	120	605	143	121	91	121	408
-118	228212	220004	166959	172322	127	399	108	140	567	129	558	144	143	100	112	421
-117	229029	219587	166295	172389	115	371	90	146	606	153	521	131	138	120	124	428
-116	228898	219815	165961	172752	105	426	131	123	529	135	581	135	129	90	128	411
-115	228605	220084	166090	172769	91	397	129	135	532	133	601	132	134	112	116	437
-114	229016	219810	166236	172336	106	406	105	136	514	120	566	158	132	108	123	390
-113	229108	220189	165089	173013	80	422	102	139	569	118	588	139	135	117	116	442
-112	228506	219778	165842	173285	86	383	118	141	534	148	513	166	141	100	119	435
-111	228830	219809	165799	173096	106	418	118	105	557	128	602	153	154	94	114	413
-110	228905	219489	165588	173591	102	392	107	149	545	114	563	141	129	112	125	377
-109	228794	219269	165900	173446	95	382	115	126	538	122	583	141	148	93	118	404
-108	228471	219760	165538	173883	94	416	104	118	531	113	585	150	126	109	106	421
-107	228811	220197	165617	172936	95	351	100	122	532	140	586	135	152	111	116	441
-106	228783	220538	165311	173061	99	420	103	141	544	144	561	139	139	110	116	414
-105	229418	219230	165362	173547	102	430	112	135	578	135	599	133	136	87	106	434
-104	229429	219590	165223	173340	102	415	117	139	550	141	570	146	120	104	136	418
-103	229623	220347	164606	172854	111	436	127	129	577	123	569	138	115	86	116	422
-102	229268	219666	164426	174192	88	391	95	143	521	141	561	135	135	93	101	421
-101	229045	219597	164655	174340	85	400	98	140	563	112	604	129	143	91	108	402
-100	229696	218995	164811	174043	96	444	101	113	508	138	577	141	157	99	121	417
-99	229599	218724	164561	174657	92	402	128	116	526	128	557	134	145	111	110	408
-98	229118	218827	164825	174843	95	413	104	159	518	123	567	148	112	102	116	407
-97	229355	218823	164853	174537	112	395	96	139	511	131	538	157	129	96	130	468
-96	229862	218284	164655	174889	82	365	114	120	563	128	542	121	120	91	106	429
-95	229280	218669	164174	175561	83	380	105	142	519	127	587	134	136	103	114	406
-94	229806	218758	164302	174882	98	384	105	133	514	122	548	138	153	120	94	425
-93	231148	218164	163728	174796	101	411	109	151	513	135	561	143	120	112	106	447
-92	230666	217583	163304	176206	84	392	109	137	568	128	559	160	142	104	129	460
-91	229506	217099	163759	177173	114	387	110	121	540	110	575	144	133	98	102	413
-90	229891	217367	163387	177158	96	396	105	123	576	126	613	163	148	119	113	457
-89	229889	216875	163310	177682	76	383	119	138	529	121	612	160	150	102	99	380
-88	231080	216815	163245	176630	88	415	88	137	549	115	581	159	130	87	110	422
-87	230964	216405	163060	177483	90	394	97	153	543	110	568	135	132	79	105	446
-86	230793	216978	162496	177598	80	417	99	133	566	131	596	149	128	95	125	407
-85	231739	215554	162953	177587	102	377	98	135	550	141	595	124	137	99	109	432
-84	232441	216963	162087	176268	97	411	108	126	474	120	606	144	151	89	97	416
-83	234975	215297	161059	176422	102	420	82	130	545	126	571	148	131	92	99	454
-82	233197	214229	160416	180196	87	439	97	127	510	119	600	132	120	96	116	449
-81	233931	211354	160623	181831	97	381	91	135	536	109	659	139	147	94	93	433
-80	233281	210666	161717	182302	77	399	101	121	521	127	579	160	116	88	98	400
-79	233406	208917	162113	183424	80	408	106	128	495	132	567	108	120	98	97	438
-78	233240	208462	162595	183421	88	393	109	110	525	117	616	140	154	100	107	418
-77	233548	208128	161755	184413	93	393	110	136	519	127	623	141	152	105	114	440
-76	233580	207287	162586	184409	90	413	103	135	529	107	573	115	135	96	108	416
-75	233989	205917	162854	185079	76	384	101	126	528	108	635	143	137	77	118	413
-74	233756	205009	162487	186593	79	405	113	130	540	120	603	132	156	91	126	399
-73	233550	203587	163369	187393	79	385	97	113	519	131	625	114	124	91	114	412
-72	233283	202127	163957	188623	91	349	100	116	508	132	585	155	151	91	114	383
-71	232747	201535	164464	189294	77	379	91	112	525	136	604	137	139	95	92	445
-70	232688	200204	164572	190492	83	386	117	125	533	121	615	157	134	101	107	404
-69	232483	199372	165475	190646	95	348	90	133	543	108	580	134	135	93	117	379
-68	232788	197885	165679	191718	64	384	118	128	532	135	584	120	158	81	116	437
-67	231920	197746	165673	192792	63	383	93	139	535	99	569	149	160	91	129	436
-66	231555	196301	166904	193162	64	360	108	140	563	127	590	132	148	79	96	391
-65	231141	196124	166954	194018	83	364	96	122	494	117	603	145	129	69	103	384
-64	230160	194937	168094	194741	75	356	77	112	530	117	591	144	148	76	104	415
-63	229498	194897	167592	196205	90	374	106	121	513	124	591	141	138	94	124	367
-62	228805	193971	168912	196448	94	370	81	142	531	104	606	137	143	88	104	417
-61	227928	193608	168752	197670	79	358	87	142	553	127	617	164	155	85	97	415
-60	227657	192252	170300	198089	74	335	92	124	519	122	615	136	123	72	103	400
-59	227205	192796	170429	197751	86	369	101	112	527	119	656	151	156	72	104	364
-58	225858	190988	171891	199426	73	370	101	131	579	140	617	144	146	84	97	391
-57	225629	190929	172035	199520	86	380	82	135	551	122	591	128	140	82	112	397
-56	224666	189927	172140	201386	79	368	84	114	511	109	610	152	123	86	107	409
-55	223624	189303	173076	201930	78	353	87	129	537	118	620	162	159	81	84	393
-54	220753	188501	175111	203532	75	360	88	125	578	130	638	150	150	90	87	380
-53	221778	189229	175019	201924	70	345	101	153	544	114	593	128	130	81	119	392
-52	220396	189556	176123	201862	71	397	83	148	596	129	658	134	153	60	105	370
-51	220132	191105	175738	201188	91	369	104	130	617	120	672	142	155	87	109	365
-50	219397	190101	175952	202441	68	337	101	115	535	119	589	159	144	93	88	381
-49	218885	190246	176833	202022	82	343	101	146	568	140	651	154	151	89	103	381
-48	217764	189918	177331	203087	87	348	95	138	594	126	632	125	154	68	91	347
-47	217693	189275	177866	203032	77	367	91	118	557	129	597	148	161	96	101	352
-46	216617	188887	179022	203531	67	358	85	148	627	148	649	113	146	79	115	377
-45	215938	189641	178618	203989	69	386	83	126	551	145	634	136	143	92	108	414
-44	214488	188583	179503	205620	78	394	88	138	561	150	687	135	145	79	103	396
-43	214195	188192	180200	205425	75	381	92	148	563	139	699	135	141	88	96	405
-42	213662	188630	180969	204874	81	381	89	127	572	151	669	184	162	86	112	387
-41	213023	188811	181031	205072	70	353	98	125	600	120	662	147	155	83	114	397
-40	211919	188585	182413	205142	68	349	101	127	600	150	692	129	162	68	105	401
-39	212407	188123	182661	204765	83	402	104	129	570	126	621	155	151	85	97	382
-38	210969	188327	182544	206192	86	406	108	135	634	143	679	148	152	75	130	375
-37	210476	188224	182827	206537	81	392	102	133	595	140	683	132	154	90	100	340
-36	209928	187587	184057	206438	85	380	98	153	572	165	669	164	156	88	115	376
-35	209545	187164	184574	206780	69	367	97	144	653	133	641	164	140	77	113	400
-34	207505	187941	185816	206824	78	376	89	136	664	132	697	141	174	77	84	392
-33	208044	188153	185733	205907	85	403	84	151	662	164	672	144	145	86	102	377
-32	208003	189011	185105	205977	70	388	81	135	618	140	651	152	162	92	89	373
-31	207357	188487	186128	206117	82	386	97	136	619	159	676	137	160	84	98	371
-30	205777	189009	186831	206405	82	389	81	128	609	158	709	148	165	84	105	397
-29	205381	188411	187572	206595	63	378	96	130	598	146	644	145	144	71	85	410
-28	205331	188486	188230	205846	58	385	97	151	630	143	686	124	164	88	109	429
-27	205035	188799	187748	206401	68	363	99	152	670	139	666	165	129	90	115	401
-26	204472	188344	188249	206879	94	382	86	160	673	140	664	138	167	61	98	377
-25	203795	188695	188757	206724	76	390	93	122	634	143	724	144	154	82	98	364
-24	203660	187963	189947	206326	83	390	90	141	635	134	668	152	141	72	88	402
-23	202491	188471	190653	206449	72	387	112	154	655	132	681	167	157	89	69	380
-22	202764	187713	190792	206685	64	387	90	144	639	163	651	138	156	92	102	393
-21	202165	189441	190241	206208	74	412	95	142	669	153	658	145	139	88	93	396
-20	201564	188849	191550	205898	75	362	103	164	648	151	680	136	155	89	92	418
-19	200774	189818	192563	204976	76	399	79	145	674	143	656	119	169	76	95	376
-18	200064	189141	192353	206399	71	378	94	135	658	159	723	139	157	87	90	375
-17	200193	189314	192722	205770	78	400	66	158	671	147	693	157	168	81	110	391
-16	199928	189188	193126	205690	65	397	70	161	681	149	688	151	163	81	106	378
-15	198660	189380	194407	205593	68	352	111	138	662	128	686	142	180	71	90	372
-14	198146	189131	194669	205856	65	368	92	143	654	147	696	159	153	75	91	376
-13	198005	190230	195224	204496	83	341	95	140	671	157	685	128	153	70	88	406
-12	197616	190017	196020	204102	75	345	108	155	698	148	692	162	167	71	112	393
-11	197144	190203	196825	203648	73	358	88	145	682	181	732	142	153	75	102	382
-10	196962	190984	196805	203259	63	344	83	152	640	152	687	161	156	69	101	367
-9	195622	191344	197219	203733	80	360	103	154	719	144	750	165	156	91	96	355
-8	195662	191512	197437	203357	75	374	97	135	679	123	684	146	166	67	73	400
-7	195092	192229	197964	202764	68	416	94	160	749	123	736	137	160	72	114	392
-6	194990	192078	198640	202096	85	371	82	161	682	177	714	144	131	86	102	362
-5	194489	192146	199400	201968	82	338	97	146	670	123	661	131	140	63	89	380
-4	194686	192375	199358	201434	70	424	113	113	678	149	716	138	145	91	94	360
-3	193512	192760	199903	201554	84	370	92	162	666	170	716	141	186	77	107	374
-2	193969	192998	199485	201448	71	392	93	146	701	142	721	155	145	70	88	350
-1	193277	192727	200170	201865	68	381	98	156	656	168	676	140	118	94	88	394
0	194210	193366	200201	200176	69	360	73	151	724	156	642	144	140	85	118	376
1	193088	193317	201019	200371	83	373	98	149	668	139	685	153	161	71	93	403
2	192370	193959	201452	200051	75	404	97	145	696	134	647	160	142	64	93	375
3	192539	194014	202063	199150	64	397	80	156	683	155	701	154	165	81	97	372
4	192459	194626	201614	198879	83	362	95	150	677	141	681	136	147	88	91	422
5	192105	194926	202617	198151	81	379	97	162	691	139	632	150	149	72	96	373
6	191965	195373	202353	198072	75	366	102	146	690	160	669	128	128	76	92	367
7	190785	196227	202957	197872	71	381	98	141	726	156	666	156	152	78	99	381
8	190946	196559	202814	197510	67	392	102	138	662	153	658	136	185	60	93	391
9	189730	196976	203787	197294	84	407	99	160	729	134	685	140	168	85	111	355
10	190022	196353	204893	196554	91	379	93	145	733	157	660	149	164	82	93	366
11	190739	197695	204261	195352	90	394	104	143	764	168	662	142	155	80	103	351
12	189613	198562	203955	195638	78	414	110	170	659	165	668	146	166	64	100	400
13	189331	198822	204130	195690	81	397	88	178	713	143	651	137	142	76	108	376
14	189476	198934	204531	194888	87	405	105	161	717	159	710	152	141	75	91	397
15	188897	199945	205481	193702	62	377	99	175	690	134	628	142	147	77	98	382
16	189668	199882	205507	192799	80	433	104	163	701	158	689	152	139	69	100	379
17	188815	200559	205203	193380	80	380	113	149	705	135	644	145	170	83	99	388
18	188739	201699	205512	192140	65	430	108	122	673	160	669	142	158	60	92	353
19	188800	201348	205853	191866	76	391	115	162	679	155	621	122	146	89	86	367
20	188652	201428	205872	191917	69	394	91	136	687	158	663	127	147	56	86	386
21	188667	202644	205295	191424	85	380	123	155	675	148	701	156	161	88	94	405
22	188208	203044	205723	190940	77	390	108	144	704	139	697	143	148	64	104	397
23	188258	203234	206886	189622	88	403	112	155	700	158	646	161	154	81	90	379
24	188161	204863	206261	188891	68	388	99	153	693	161	655	133	148	73	101	416
25	187949	205064	205820	189211	80	341	88	139	756	160	658	125	147	73	92	383
26	188292	205232	205713	188899	79	392	115	157	659	155	614	136	176	83	98	387
27	187390	206101	206570	187913	80	385	95	150	733	162	614	148	140	91	92	383
28	188249	205966	205624	188123	88	375	102	139	623	157	709	145	164	71	91	368
29	187832	206716	206131	187388	76	370	101	154	692	170	645	149	144	78	103	374
30	187241	206959	207145	186737	69	367	99	150	680	170	642	147	148	73	91	361
31	187894	207698	206608	185832	81	389	78	145	725	155	617	147	141	81	95	372
32	187025	207749	206986	186064	83	381	103	149	665	150	636	146	138	81	95	367
33	187176	209455	206756	184657	93	405	113	152	682	159	647	135	137	82	90	372
34	186065	210020	207239	184719	92	391	94	139	696	154	627	167	144	77	107	332
35	188039	210228	206285	183612	71	441	84	154	644	144	623	132	128	84	92	406
36	187773	210732	205871	183700	87	401	94	159	673	148	632	147	139	74	102	397
37	188291	211218	205390	183030	68	389	103	145	685	139	593	143	159	88	84	363
38	187898	211833	206189	182122	68	409	116	135	668	151	601	123	129	82	109	363
39	188599	211992	205599	182090	77	376	111	139	641	143	632	133	131	78	88	367
40	187501	213348	205608	181587	82	406	108	123	648	162	594	140	137	68	94	352
41	187834	213487	205597	181164	68	374	95	163	699	151	613	153	148	81	102	375
42	187880	215487	204983	179874	85	390	104	148	665	147	571	121	125	76	95	365
43	188328	214718	204908	180214	80	403	81	123	673	173	625	166	132	64	89	360
44	188915	215623	203508	180152	77	358	106	149	649	140	608	118	145	61	92	369
45	188552	217424	203361	178602	80	386	107	140	638	149	538	125	117	80	84	371
46	188809	218301	202251	178635	66	389	110	138	688	151	630	135	139	53	94	381
47	189039	218436	201978	178540	89	415	112	131	632	157	580	151	135	83	103	350
48	188792	218362	203111	177794	76	393	89	124	663	159	573	134	130	93	74	351
49	187964	218216	204140	177648	78	409	108	136	662	162	615	132	131	75	86	359
50	186952	219126	205486	176562	84	398	113	135	680	145	572	117	133	88	86	335
51	187868	221240	203685	175391	74	373	94	152	670	139	540	131	104	98	77	355
52	187881	221844	203282	175040	95	373	114	129	615	170	570	138	136	69	91	346
53	189298	223463	201837	173322	81	386	116	146	609	133	520	130	142	75	80	364
54	189123	224894	200324	173767	90	361	95	172	631	146	533	117	132	76	88	350
55	189214	224910	200182	173809	97	417	109	157	650	154	550	164	145	78	85	355
56	190004	226303	199410	172262	86	373	102	139	588	154	536	129	145	105	90	346
57	190891	226917	198805	171469	92	421	104	132	631	144	544	139	138	74	88	343
58	191578	227066	198597	170851	82	371	96	132	600	154	570	132	94	84	100	382
59	192316	227891	197655	170212	76	400	99	137	639	135	532	125	104	81	95	374
60	192521	228910	197214	169462	70	404	102	148	622	136	486	134	125	76	92	394
61	192702	229612	196736	169107	102	391	124	138	640	137	549	140	101	73	94	344
62	194236	229926	195020	168874	88	398	109	136	571	157	537	135	143	96	106	347
63	194167	231179	194504	168244	101	386	96	116	596	162	516	149	136	71	96	349
64	195992	231664	193742	166906	77	419	108	152	589	143	553	116	145	93	87	395
65	195376	232037	192813	167802	101	402	100	140	578	146	534	146	133	87	111	335
66	196765	232481	192609	166141	83	394	96	131	551	156	526	124	123	87	94	379
67	197810	232358	191828	166224	88	389	116	144	640	121	507	119	146	79	92	364
68	199500	232758	190827	165185	95	401	108	129	584	135	529	141	110	84	99	364
69	200420	234151	188806	164671	94	376	108	131	606	142	540	140	125	86	91	375
70	201100	233628	189275	164106	99	416	98	148	578	140	501	134	126	82	101	396
71	202782	233153	187940	164210	101	397	112	125	617	128	545	148	131	92	89	388
72	203628	234113	186757	163567	110	430	123	130	575	143	527	142	125	78	84	394
73	204125	234619	186121	163069	96	415	113	147	589	134	534	131	125	83	112	409
74	204980	233563	185567	163837	97	418	122	151	549	121	519	145	123	111	97	397
75	206588	234086	184516	162805	95	425	110	139	640	135	519	129	109	91	108	415
76	207158	233714	184968	162157	99	422	115	154	542	129	522	118	115	94	104	413
77	208868	233880	183640	161578	104	387	101	130	566	140	510	127	121	98	115	413
78	210435	234165	181945	161446	86	405	101	134	547	137	510	131	120	90	104	372
79	211711	235385	179129	161840	113	431	99	129	531	123	528	141	128	85	89	380
80	212911	232106	179762	163166	95	384	117	135	577	142	541	139	124	92	93	378
81	213245	233051	179245	162340	107	428	113	150	573	149	525	123	117	87	100	380
82	212696	232349	179971	162940	97	379	121	148	558	137	557	132	113	92	108	385
83	213979	232043	179556	162494	99	431	108	134	569	148	494	153	126	85	97	409
84	213401	232163	179295	163134	93	421	104	125	580	122	548	117	132	96	102	411
85	214042	231469	179232	163041	95	413	97	145	578	137	528	133	127	96	105	402
86	213885	231899	179542	162644	96	458	122	152	581	128	569	145	123	92	115	419
87	215095	232305	177449	163031	90	402	123	127	592	146	514	133	127	99	100	410
88	215587	231327	177282	163796	106	470	115	162	596	121	518	114	138	91	103	416
89	216477	231713	176338	163326	100	426	114	144	551	122	533	132	118	101	108	455
90	216431	231245	176309	163930	97	405	126	136	582	129	551	130	113	106	122	423
91	216498	231228	176732	163388	101	423	115	140	572	110	541	140	135	95	112	396
92	216673	231694	175655	163610	104	433	117	130	556	125	554	123	148	80	94	431
93	216547	230737	176262	164204	102	409	115	143	552	129	543	131	129	78	118	453
94	217009	230917	176041	163974	82	406	106	137	583	154	485	122	122	107	82	447
95	217144	230767	175500	164423	100	428	108	138	580	142	522	141	140	99	108	428
96	216561	230828	176031	164143	100	409	116	133	588	126	571	146	129	98	101	400
97	217686	230908	175517	163565	84	483	124	159	639	123	556	140	146	93	96	430
98	218110	230758	174556	164229	88	412	103	135	575	132	520	142	113	102	107	401
99	218594	231665	172936	164458	94	409	109	141	581	141	532	136	128	101	107	411
100	218225	229904	174134	165489	106	420	113	132	568	144	550	116	126	115	98	394
101	218630	230014	173805	165399	109	428	104	136	576	138	568	127	121	92	110	399
102	219039	230098	173681	164827	109	414	124	141	578	121	539	132	133	94	115	395
103	218707	230083	173534	165323	106	403	108	128	617	129	523	127	132	98	105	414
104	218685	229785	173549	165746	93	463	122	162	548	125	565	127	133	85	102	370
105	218752	229732	173808	165438	120	385	95	139	580	145	577	141	125	86	101	404
106	219031	229475	173777	165371	120	424	121	146	587	138	528	137	131	89	112	376
107	218230	230355	173920	165334	92	463	119	131	561	120	550	117	144	70	88	414
108	218607	229767	173552	165936	95	404	120	150	554	126	551	149	148	115	98	392
109	219993	229254	172462	166045	99	434	119	134	559	129	556	125	133	91	128	431
110	219163	229724	172855	165753	87	389	106	153	577	140	550	133	130	105	114	433
111	219600	229621	172238	166208	99	406	106	146	564	151	561	130	120	90	103	406
112	219353	229304	172636	166190	104	406	106	127	560	104	542	133	124	91	111	412
113	219159	230587	171465	166268	111	404	106	152	554	134	562	133	122	119	117	388
114	219075	228439	173157	166746	99	396	106	126	602	133	566	112	136	98	110	407
115	219425	229200	172732	166383	124	432	121	136	523	155	547	134	140	93	95	446
116	219779	228940	172511	166335	114	462	117	162	540	124	562	129	149	85	97	409
117	219621	229224	172458	166016	99	392	125	150	604	131	581	145	140	93	109	420
118	219412	228932	172593	166457	104	401	116	144	591	117	558	119	127	107	117	444
119	220283	229189	171034	166957	82	453	121	155	566	114	595	135	137	84	114	389
120	219694	228695	171660	167365	93	418	128	163	566	127	549	135	122	93	106	420
121	219341	228684	171837	167684	102	467	132	140	590	122	536	145	132	72	88	417
122	219887	228109	172069	167399	93	456	100	137	597	120	520	143	134	98	117	416
123	219276	228369	172739	167073	99	429	121	156	610	116	553	124	109	88	128	404
124	219209	228405	172695	166928	108	382	109	147	570	119	531	122	127	97	102	400
125	219755	228657	172271	166700	91	418	108	151	521	135	541	124	125	93	108	429
126	219462	227937	172385	167559	115	412	101	147	579	137	571	129	120	102	123	369
127	219002	228222	172576	167433	105	424	103	108	554	129	514	146	119	93	108	374
128	218669	228041	172557	168042	107	439	142	142	572	124	591	135	137	118	132	393
129	219426	227969	173042	166991	96	401	98	146	570	168	520	138	141	89	106	404
130	219816	228017	172665	166976	116	423	117	142	552	132	565	132	126	114	87	399
131	219153	228143	172765	167288	109	445	99	116	560	128	524	147	141	103	109	424
132	219390	227855	172624	167453	88	426	123	145	579	148	543	135	125	96	115	382
133	219409	228005	172861	166959	90	444	127	163	578	130	547	134	151	95	120	409
134	219450	227240	173104	167457	112	411	112	130	557	128	555	132	139	103	113	409
135	219087	227703	172691	167884	91	417	114	146	606	141	553	129	123	87	119	396
136	218967	227249	173127	167856	102	458	128	143	548	126	533	127	127	75	102	408
137	219971	227631	172095	167375	107	409	140	148	555	118	522	143	123	92	121	386
138	219777	227407	172232	167731	95	387	122	144	599	124	538	136	152	84	112	408
139	219680	227429	172836	167241	88	455	104	151	572	133	548	154	138	80	122	427
140	220052	226789	172528	167893	88	394	108	137	575	133	555	111	107	104	123	429
141	219722	227244	172067	168145	100	413	107	126	581	132	540	140	150	113	109	402
142	220052	227361	171925	167762	89	422	102	132	547	122	566	130	141	102	120	441
143	220747	226561	171780	168060	98	424	123	156	566	111	516	142	107	110	128	400
144	220352	226526	171823	168361	112	427	112	136	606	142	567	129	118	88	103	386
145	219902	226521	171795	168842	87	431	120	144	577	120	574	137	127	114	115	421
146	219924	226778	172423	167796	89	447	114	137	603	131	510	138	152	100	116	451
147	220122	226369	172109	168319	109	389	115	112	548	134	564	139	123	85	100	409
148	220021	226271	172032	168615	100	431	119	145	574	123	573	141	126	102	124	413
149	219880	226286	172482	168353	117	437	113	125	554	120	591	142	123	95	119	432
150	220529	226345	171812	168310	89	395	113	141	568	148	630	151	123	109	94	413
151	219624	226680	171699	168954	108	429	108	157	597	140	550	137	141	91	110	406
152	219989	226542	171270	169331	117	428	103	146	557	124	557	159	132	103	96	438
153	220787	226333	171075	168704	104	429	117	134	542	119	580	141	135	87	111	414
154	220062	225989	171644	169208	97	406	142	126	556	121	560	143	126	82	103	416
155	220328	225717	171586	169516	88	394	104	143	564	153	528	131	130	106	100	395
156	219365	226262	172379	169088	93	413	112	156	546	139	578	141	144	92	105	439
157	219567	226262	172051	169064	88	396	101	155	573	137	565	143	143	96	92	409
158	220560	225348	171609	169444	83	408	129	172	563	142	563	133	118	96	111	410
159	220159	225349	172009	169343	108	454	107	136	625	123	575	145	151	103	115	397
160	220105	225574	171812	169470	125	448	109	151	607	133	571	136	139	87	115	395
161	220923	224772	171290	169879	91	415	118	135	574	131	580	135	151	114	129	424
162	220636	224641	171283	170302	101	363	140	140	568	143	560	148	127	96	117	404
163	220522	225146	171825	169272	121	416	113	143	589	138	571	157	115	120	127	405
164	220792	224895	170998	170191	106	410	121	125	609	126	576	135	128	111	128	392
165	220486	224930	171634	169811	97	401	128	136	584	135	526	146	139	104	124	426
166	220699	224585	172240	169395	115	415	133	155	622	152	547	132	120	83	114	401
167	220362	225096	171039	170302	102	409	129	130	584	135	555	138	127	90	109	412
168	220452	224511	170907	170938	124	378	93	133	582	120	575	158	139	87	112	388
169	221282	224287	171035	170205	86	428	121	169	558	116	563	133	160	82	106	415
170	220818	223958	171515	170574	105	408	132	140	601	137	640	127	124	95	121	392
171	220021	224032	171430	171057	97	418	96	148	571	120	546	141	142	96	111	424
172	220342	224266	171438	170681	88	389	123	148	544	121	552	128	134	104	113	363
173	220106	224571	171320	170802	109	420	119	128	546	135	556	155	135	102	123	405
174	220132	224723	171261	170616	121	402	127	135	564	134	581	154	119	90	100	404
175	220885	223724	172023	170044	105	410	138	157	597	141	586	156	124	104	102	445
176	220538	223314	171858	170805	99	405	102	154	564	130	561	137	135	113	111	413
177	219863	224564	171271	170999	109	407	122	135	601	139	612	151	150	91	128	380
178	220031	224091	171488	171142	91	376	104	120	590	119	591	170	128	106	110	382
179	220166	223903	171643	171038	97	390	126	135	577	142	581	152	152	101	123	410
180	220215	223036	171658	171653	90	395	102	141	571	118	552	160	139	97	114	388
181	220828	223217	171658	171076	93	418	114	148	581	134	576	145	124	112	112	432
182	219371	223996	171744	171692	95	402	106	144	549	136	596	135	109	101	113	380
183	220384	223648	171519	170990	103	377	128	131	560	143	576	144	128	96	105	379
184	219516	223622	172120	171367	108	411	129	150	575	153	560	127	128	112	113	356
185	219201	223684	172252	171464	107	436	127	133	569	141	587	140	119	100	124	399
186	220042	223965	171893	170658	98	412	133	140	565	130	554	138	150	95	125	369
187	219914	222821	172359	171522	95	431	131	148	592	132	600	126	111	90	106	402
188	219507	223343	172564	171058	113	419	114	138	574	141	568	165	127	105	103	420
189	219886	222426	172609	171660	98	433	130	129	551	144	559	133	119	109	101	394
190	220221	222341	172511	171525	90	447	117	145	547	127	618	135	106	111	114	404
191	219890	222925	172948	170859	112	412	119	136	547	143	596	157	124	84	130	442
192	219423	223298	173013	170821	105	439	125	138	635	142	567	133	147	110	106	398
193	219148	222948	172204	172347	109	386	116	154	566	138	571	138	130	74	107	409
194	219152	222704	173112	171618	96	418	110	134	617	132	579	137	140	89	111	419
195	219256	223182	172963	171024	113	432	108	127	585	131	542	140	116	85	118	410
196	219084	222707	173102	171749	102	391	124	134	606	155	552	130	152	112	119	396
197	219241	223105	172551	171575	98	439	121	137	558	138	617	122	147	98	113	386
198	218942	222798	172635	172129	95	435	107	126	626	133	548	120	146	116	136	418
199	219571	222774	173318	170931	108	433	99	144	590	152	544	143	132	104	118	393
200	219577	222449	172899	171445	114	399	116	141	606	134	599	150	129	105	109	453
201	219534	222342	173013	171376	87	417	120	150	595	141	611	140	135	109	113	422
202	219253	222994	173669	170531	100	400	105	129	596	151	567	143	127	99	124	400
203	219499	223147	173011	170525	100	403	128	136	594	124	612	146	133	95	108	397
204	218982	222779	173363	171138	110	411	116	137	584	144	559	140	150	97	116	413
205	219740	222754	172881	171080	89	379	113	144	607	109	573	136	160	109	106	405
206	219562	221526	173866	171377	105	416	129	143	587	140	567	129	135	91	108	386
207	219473	222799	173210	170889	88	438	133	149	603	125	539	113	144	100	115	430
208	218732	222714	173557	171060	99	410	122	129	630	143	570	166	143	96	116	426
209	219286	222419	173460	170995	107	418	118	130	587	114	579	141	129	104	91	379
210	218448	222861	173927	171145	115	419	117	140	573	128	600	123	128	134	101	410
211	219152	222451	173797	170873	107	416	110	145	618	118	575	133	115	88	90	394
212	219317	222343	173701	170913	112	427	127	145	582	139	580	141	129	103	113	363
213	219317	222431	173820	170704	109	410	96	142	628	125	605	135	125	106	118	419
214	218634	223556	173705	170436	100	449	135	152	591	136	574	152	113	99	121	442
215	218868	222880	173884	170559	94	430	117	141	584	129	597	145	122	101	94	460
216	218014	223151	174164	170843	105	411	116	144	600	139	554	122	151	103	112	371
217	219190	222295	174171	170639	100	418	119	126	635	135	552	145	135	98	95	378
218	218734	222447	173904	171010	104	396	126	154	594	126	553	155	145	96	104	391
219	218621	222602	173723	171170	103	422	109	152	601	122	579	138	126	110	106	385
220	219363	222249	173641	170701	104	406	108	137	579	138	629	146	135	92	94	432
221	218657	222864	173535	171008	109	416	116	149	551	134	586	136	127	85	95	450
222	218781	222996	173888	170501	117	402	103	149	581	149	555	143	144	89	115	398
223	219625	222228	173050	171214	105	392	130	142	573	127	584	158	138	91	113	417
224	219325	222723	173448	170681	110	419	123	132	604	145	608	151	140	103	105	386
225	219049	223217	173393	170491	90	434	105	125	545	135	588	131	137	114	109	442
226	219481	222908	173159	170360	98	386	109	132	565	134	580	150	130	102	131	406
227	219046	222615	173643	170618	105	402	147	166	602	126	545	139	150	108	130	394
228	219079	222960	173084	170848	107	412	106	124	560	127	587	146	136	110	104	425
229	218637	222814	173423	171074	117	381	124	149	643	115	580	122	129	92	128	420
230	219174	222652	173456	170687	105	442	114	142	575	125	593	139	149	116	111	375
231	219462	222148	173537	170824	91	429	95	144	596	132	576	146	141	108	117	424
232	219200	222070	173489	171186	97	426	118	153	576	135	578	145	119	96	107	423
233	219777	222662	172920	170516	89	435	110	153	602	144	646	142	138	99	115	420
234	219655	221806	173391	171058	105	427	118	146	570	131	594	153	122	101	117	416
235	219424	222529	173338	170510	108	418	105	130	587	131	607	105	150	109	119	457
236	219321	222691	173170	170541	91	412	103	147	608	146	560	136	121	98	92	412
237	218689	222324	173393	171338	101	467	101	144	546	145	602	152	137	104	113	398
238	219350	222485	173409	170709	101	396	110	143	576	147	582	126	134	97	116	411
239	219255	222356	172600	171619	113	407	107	132	609	125	601	132	132	100	121	377
240	219060	221852	173631	171375	100	382	130	135	578	136	591	144	133	100	109	401
241	219562	221886	173042	171326	97	435	114	147	590	126	598	143	146	97	97	420
242	219879	221667	172740	171432	100	417	123	134	602	143	568	135	135	97	109	462
243	219553	222256	172811	171053	91	383	120	129	593	137	579	141	134	112	112	392
244	219884	221506	172696	171635	116	449	103	131	593	126	555	141	130	93	116	426
245	220108	221884	171945	171807	78	420	110	150	593	129	593	133	122	101	107	412
246	220008	221861	172238	171509	105	418	132	147	614	141	591	154	135	114	114	404
247	219799	221901	172555	171520	96	441	127	139	610	120	610	138	98	107	127	412
248	219540	221376	172489	172346	88	389	123	133	590	140	578	139	142	107	104	427
249	220192	221750	172109	171756	108	390	106	127	601	144	612	150	140	87	128	409
250	219505	221622	172066	172474	107	398	114	136	607	149	591	134	141	98	117	429
251	219412	221879	172094	172193	86	449	105	163	588	159	584	160	126	100	129	406
252	220032	221376	172327	171831	98	408	104	150	620	140	561	134	140	102	129	425
253	219409	221682	172565	171786	112	444	107	129	554	126	599	137	137	91	116	418
254	220172	221477	172008	171889	81	393	138	134	613	150	597	134	133	87	116	494
255	219526	221440	172019	172617	97	390	124	143	559	146	589	156	122	91	107	418
256	220241	221485	171890	171921	110	397	96	147	608	121	592	149	121	96	124	443
257	219976	221641	172222	171834	114	386	108	132	602	136	579	149	126	80	120	431
258	220256	220833	171954	172562	115	406	128	140	591	136	572	147	129	92	113	446
259	220132	220987	172074	172308	97	415	110	140	550	128	644	151	142	90	120	408
260	220710	221721	171241	171972	103	390	110	124	568	118	590	149	129	107	113	444
261	220579	220871	171267	172872	118	405	131	144	548	136	536	157	151	88	105	440
262	220328	220768	171557	172810	106	433	110	140	614	156	578	172	136	86	124	407
263	221173	220691	171764	171942	95	451	112	127	639	119	608	154	127	88	118	408
264	220623	221128	171391	172437	91	423	129	149	559	134	545	144	120	96	104	393
265	219886	221100	171938	172748	130	379	124	154	568	129	581	136	130	106	91	422
266	220421	220921	171671	172299	97	442	97	125	591	131	591	130	149	97	109	405
267	220606	220682	171577	172866	127	400	127	143	574	138	596	167	134	85	108	425
268	220512	220311	172124	172762	98	439	103	146	605	145	584	130	128	79	113	422
269	220357	220820	172057	172354	79	398	99	146	535	135	568	135	109	100	110	387
270	221319	220350	171558	172238	91	416	130	160	583	148	551	139	145	92	98	413
271	221001	221018	171116	172249	114	408	86	164	538	142	618	163	139	93	111	396
272	220394	220847	171876	172381	104	438	107	152	578	130	556	148	163	91	131	370
273	220441	220179	172839	172041	113	425	123	145	613	119	595	134	143	105	126	416
274	220856	221124	171641	171853	103	441	121	126	593	141	580	147	120	103	139	440
275	221277	220307	171234	172581	104	431	120	149	608	109	599	137	134	113	113	404
276	220372	220510	172067	172492	109	406	130	127	575	153	606	145	135	110	120	405
277	220732	221005	171586	172047	88	420	117	155	581	160	577	135	134	103	117	421
278	220676	220117	172324	172423	94	431	111	140	601	159	565	140	140	111	93	420
279	221087	221371	170936	172321	95	413	112	128	540	132	552	156	126	86	123	434
280	220871	220899	172224	171760	87	434	102	128	628	125	603	158	132	101	107	407
281	220259	220306	172175	172860	105	437	107	143	570	134	616	132	129	107	104	437
282	220876	221238	171690	171678	91	412	107	152	593	133	584	144	143	105	111	411
283	219935	220975	172158	172419	97	434	124	154	594	128	626	160	105	104	104	427
284	220612	221041	171823	171977	117	418	102	153	602	129	625	134	131	108	104	399
285	220194	220546	171885	172827	93	401	112	130	588	137	571	126	147	96	107	420
286	220816	220980	171826	171816	118	426	98	135	601	130	589	143	134	103	109	444
287	220781	221445	171481	171861	105	426	124	128	572	157	606	135	133	89	119	445
288	220695	220724	171622	172439	96	430	113	147	631	134	607	147	149	85	94	390
289	220086	221115	172073	172293	115	463	127	134	633	145	554	155	128	106	112	413
290	220791	220689	171837	172145	100	408	126	146	559	131	613	151	131	94	96	403
291	220729	221535	171094	171917	103	412	136	143	599	137	598	147	118	109	118	394
292	220421	221308	171623	171898	90	425	106	145	588	145	610	142	126	98	139	414
293	220442	220765	172235	171829	111	401	109	117	594	116	578	127	140	104	116	414
294	220750	221060	171584	171985	93	414	116	122	575	136	545	133	140	110	115	426
295	220284	221286	172049	171835	103	429	124	131	572	133	553	155	129	101	99	433
296	220494	221860	171776	171329	101	397	112	146	570	135	586	156	132	93	110	411
297	219782	221483	172104	171982	88	397	99	132	574	119	599	142	130	106	101	420
298	220194	222076	171933	171152	113	404	112	151	609	124	589	158	124	114	113	383
299	219804	221730	172146	171794	104	413	107	150	592	125	604	130	136	116	103	422
300	219976	222280	171693	171355	111	424	116	158	608	133	585	150	133	106	110	411
301	219187	222424	172004	171861	109	428	114	136	601	137	583	140	118	114	114	410
302	220426	222354	171320	171468	108	416	116	130	580	130	552	154	140	102	95	409
303	219930	222165	171621	171809	104	412	120	135	614	155	576	119	122	94	97	396
304	220094	222466	171806	171139	103	413	117	167	574	150	603	124	147	118	102	422
305	219089	222649	172801	170698	105	391	103	150	592	148	560	152	108	75	113	424
306	219441	222647	171688	171645	108	394	118	147	623	155	617	126	137	97	136	400
307	219155	222996	171949	171432	103	377	121	121	619	143	565	137	154	97	114	425
308	219323	222471	172385	171201	97	399	128	127	521	143	595	167	134	101	106	409
309	218769	222978	172306	171231	109	403	119	130	619	127	550	141	117	110	106	408
310	220031	223374	171763	170190	106	386	125	127	628	151	582	141	144	81	106	399
311	219620	223064	171960	170884	101	429	107	155	574	132	622	169	123	99	97	402
312	219676	222590	172199	171101	107	411	124	144	578	135	578	141	134	111	117	376
313	219780	222516	172422	170659	93	392	126	127	574	120	569	140	129	126	92	403
314	219637	223180	172142	170706	104	450	95	157	593	145	579	139	137	96	121	437
315	219096	223775	172212	170366	99	414	91	144	566	134	590	132	148	115	124	395
316	219751	223962	171706	170095	103	403	121	151	608	152	581	125	122	107	115	418
317	218953	223438	172939	170073	97	425	105	144	599	154	560	139	161	92	128	433
318	219746	223881	171436	170284	93	435	112	134	581	115	523	152	132	85	107	423
319	218961	224198	171937	170322	101	449	113	135	595	134	576	140	128	101	105	419
320	219172	223320	172536	170319	105	381	102	124	614	135	611	145	123	89	117	379
321	219283	223857	172294	170076	104	411	116	131	551	124	570	136	122	96	107	407
322	218242	224130	172647	170247	93	407	113	149	577	128	586	137	150	122	124	400
323	219297	224370	171732	170072	95	448	107	153	620	138	584	122	141	99	109	389
324	219079	223698	172690	169744	109	379	121	136	610	126	561	148	138	88	108	412
325	219785	224023	171789	169753	97	417	116	147	595	147	589	129	141	103	96	396
326	218882	223850	172364	170208	108	424	105	150	591	124	598	123	124	98	127	425
327	218990	224262	171956	169969	97	423	119	125	599	127	604	140	141	120	116	400
328	219347	224053	172030	169877	99	433	109	146	577	126	572	142	161	97	117	428
329	218959	224190	172142	169820	98	436	121	118	584	137	602	153	116	98	101	414
330	218992	224602	172053	169485	98	450	106	147	600	128	598	132	135	103	113	410
331	218613	224458	172062	170181	113	386	117	134	566	126	588	124	128	114	101	404
332	218548	224896	171760	170057	108	421	111	131	554	122	576	127	110	93	122	392
333	219439	223844	171954	170101	92	416	110	141	579	132	553	122	135	86	116	389
334	219669	224588	171545	169571	116	375	119	146	618	120	587	147	127	94	114	400
335	219136	224758	172144	169191	95	408	120	157	593	138	570	150	140	107	119	409
336	219055	224886	171625	169758	89	446	113	115	587	146	568	130	144	109	121	387
337	218569	224767	171931	169907	102	452	116	147	575	136	589	157	137	109	107	404
338	219665	223842	171996	169487	104	384	113	134	583	132	596	146	133	105	111	441
339	219171	224466	171769	169680	93	421	95	141	542	136	604	134	133	71	114	420
340	218985	224057	172558	169526	98	403	122	134	610	129	592	132	145	114	111	363
341	218768	224931	171911	169449	107	405	108	142	606	134	599	152	137	90	125	396
342	218678	224542	171979	169838	95	383	109	136	627	146	578	141	118	83	105	414
343	219128	225034	171614	169398	105	423	122	156	606	130	587	146	132	102	129	414
344	219299	224417	171765	169519	119	407	128	144	584	131	566	141	116	95	125	376
345	219625	224375	171775	169502	107	386	119	137	581	141	581	145	128	104	103	387
346	219579	224570	171602	169364	105	396	117	139	607	137	598	155	139	100	105	378
347	219168	223797	172681	169356	119	384	119	147	591	122	531	131	149	116	114	390
348	219561	225058	171185	169341	110	415	124	130	632	139	599	125	126	102	124	421
349	218276	224717	172486	169829	113	428	109	131	570	162	600	157	111	90	104	405
350	219247	224559	171475	169912	88	398	118	138	588	126	596	139	130	107	110	428
351	219503	223745	170952	170830	123	408	120	146	581	150	581	141	144	108	110	423
352	218609	223763	171802	170929	110	427	83	127	645	143	573	155	126	93	111	394
353	219293	224178	171966	169525	110	445	121	138	654	125	554	131	142	104	122	402
354	218995	224692	171597	169641	90	415	118	120	615	113	598	125	135	107	120	393
355	218700	224501	172505	169240	86	440	109	153	566	141	553	136	127	96	105	405
356	219667	224324	171362	169482	114	410	120	136	601	136	563	149	113	105	120	413
357	219569	224394	170926	170061	99	398	107	146	558	146	586	158	132	101	110	401
358	219050	224248	171817	169831	124	434	88	138	589	134	548	146	147	93	102	386
359	219219	224309	171531	169853	93	396	111	144	576	132	574	135	125	107	113	419
360	218973	224018	171812	170204	106	409	132	142	608	125	561	161	123	104	115	444
361	219160	223862	171901	170075	89	407	113	134	574	110	607	164	126	87	105	416
362	219893	223733	171131	170323	108	387	126	165	555	128	555	149	133	98	109	405
363	219606	223614	171341	170079	108	395	141	145	578	142	582	145	134	91	122	407
364	219962	223225	171593	169966	104	382	132	129	566	127	563	114	121	119	103	466
365	219155	224173	171510	170057	112	388	98	144	541	133	578	145	149	91	91	387
366	219302	224302	171417	169905	128	393	114	114	569	140	597	156	129	112	115	382
367	219242	224096	171411	170146	106	403	126	154	630	137	587	169	124	115	105	387
368	220008	223440	171202	170233	122	390	122	130	616	135	603	158	127	99	104	398
369	219153	223118	172335	170285	110	423	130	136	604	132	592	159	147	111	117	439
370	218680	224029	172020	170156	104	427	129	144	609	132	560	129	141	101	101	404
371	219835	222990	171440	170359	108	420	102	139	585	132	602	171	136	105	108	398
372	219599	222992	171682	170533	113	402	115	153	553	126	604	133	130	91	113	428
373	219691	223310	171966	169654	89	409	123	132	584	127	546	145	149	98	114	432
374	220116	222277	171053	171133	106	416	112	152	624	130	628	144	150	98	102	426
375	219879	223308	171500	170016	106	429	106	131	586	139	555	129	131	88	106	410
376	219550	223757	171042	170460	121	409	112	154	558	117	608	159	114	87	104	406
377	218836	222972	171752	171060	108	448	120	128	609	150	605	133	128	108	106	424
378	219405	222748	171675	170796	113	396	117	142	556	126	576	137	121	116	114	419
379	219522	222769	171826	170644	103	409	104	153	593	135	646	145	121	104	115	431
380	219278	223371	171923	170113	106	397	120	145	623	156	592	129	137	93	96	397
381	219667	221954	172226	170800	106	419	112	128	578	137	541	156	126	102	109	404
382	219304	222586	171852	170663	121	447	137	142	610	134	616	166	149	78	117	404
383	219773	222961	171249	170550	85	406	112	132	555	139	543	119	149	92	110	415
384	219461	223215	171369	170463	105	437	142	134	621	131	604	145	158	98	110	394
385	219436	223404	171179	170457	106	406	125	155	595	133	604	135	127	112	114	393
386	219365	222762	171807	170465	114	428	131	134	600	133	552	161	139	97	116	418
387	219144	222425	171810	170987	114	445	119	157	609	151	594	156	120	84	122	429
388	218935	222795	171750	170858	115	418	115	150	585	139	551	154	119	104	118	411
389	219032	222684	172157	170553	99	435	121	163	603	130	644	148	134	97	126	388
390	219233	222174	172069	170832	106	441	101	120	580	134	618	147	136	113	107	403
391	220695	222219	171611	170021	119	409	130	135	560	117	581	150	126	102	106	453
392	219629	222212	171594	171099	102	413	100	133	528	144	571	147	123	97	107	397
393	219407	222148	172040	170679	112	397	111	151	598	134	589	136	122	93	121	419
394	220169	221893	172191	170033	101	415	113	156	626	120	559	123	135	94	122	423
395	219363	221833	172032	171178	98	421	114	135	590	126	599	141	132	105	107	419
396	219638	221674	172224	170775	101	418	101	136	632	132	593	146	141	126	110	383
397	220076	221626	172044	170692	109	449	122	141	646	140	578	124	162	99	111	383
398	219050	222500	171975	170791	103	444	117	165	599	129	617	132	127	96	133	456
399	219462	222055	171958	170770	105	435	116	138	572	138	600	128	148	109	120	424
400	219207	222162	172345	170621	94	434	123	140	583	141	578	127	135	120	118	422
401	219887	221642	171839	170770	95	423	112	137	609	143	585	151	135	115	107	396
402	218892	221536	172368	171295	113	428	112	119	593	127	606	132	130	96	121	392
403	220505	221521	171725	170712	101	425	110	143	599	141	541	150	160	99	119	424
404	219380	222026	171851	170946	103	429	113	145	592	154	601	142	130	106	134	414
405	219280	221741	171817	171258	102	433	117	138	552	124	557	156	115	107	101	425
406	219826	221575	172276	170536	86	438	113	148	619	125	574	162	131	105	104	412
407	219672	221567	172406	170551	109	458	99	137	588	117	563	141	124	106	105	393
408	219984	221297	172382	170315	101	431	109	146	604	132	567	145	147	100	122	430
409	219631	221087	172626	170787	121	421	114	142	611	133	594	158	136	106	98	428
410	219457	221418	171992	171148	122	430	105	151	657	148	585	148	120	104	101	404
411	219743	221658	171704	171003	103	415	124	134	592	156	563	121	135	102	103	429
412	220144	221136	171843	171068	97	455	124	130	624	133	566	125	133	106	138	389
413	220138	220976	172014	170920	79	436	117	159	603	118	563	157	140	106	118	394
414	219350	221162	172458	170876	107	442	103	158	595	131	603	142	141	113	118	410
415	218925	221767	172396	170983	118	434	115	164	587	112	590	155	139	113	123	435
416	219593	221383	171607	171352	107	385	99	130	613	149	624	153	155	107	126	450
417	219548	221166	171777	171375	108	440	108	170	586	149	596	126	156	114	128	411
418	220332	220799	171302	171549	89	415	98	126	600	140	625	155	138	92	99	432
419	219653	221321	171489	171414	103	465	110	146	606	144	606	137	147	97	124	428
420	219111	220913	172145	171882	106	407	116	141	618	134	605	146	135	101	100	412
421	219067	221996	171991	170818	117	441	127	118	538	124	610	134	148	84	119	413
422	219411	221446	171400	171602	92	415	95	134	597	123	601	138	113	77	119	387
423	219642	221121	172245	170931	112	425	117	147	602	127	584	126	126	104	132	403
424	219802	221582	171705	170701	100	444	114	156	591	138	583	144	128	110	131	447
425	219448	220807	171594	171851	91	399	102	151	531	121	553	160	145	108	126	432
426	220486	220855	171308	171039	97	408	110	167	599	145	606	146	146	88	111	434
427	219306	220643	172124	171820	119	416	116	158	610	136	598	154	139	116	106	426
428	220635	220788	171447	170909	103	428	116	159	587	133	661	121	130	100	121	432
429	219401	220430	171649	172377	91	410	108	145	623	120	595	152	164	107	95	410
430	219666	220456	171457	172199	100	420	116	147	604	125	559	136	128	102	101	422
431	219851	220412	172058	171511	85	408	113	136	621	138	620	132	118	110	110	416
432	219792	220835	172010	171233	104	429	117	130	566	131	611	154	129	105	143	386
433	219574	221284	171610	171362	106	450	98	156	581	124	594	148	135	119	109	417
434	219295	221171	171998	171302	111	424	112	119	589	150	621	146	158	110	102	403
435	219747	220875	171396	171547	104	393	123	145	621	132	618	128	143	96	113	433
436	220060	220892	170809	171974	122	429	95	149	588	138	645	167	125	112	106	415
437	220076	220306	171724	171666	115	428	103	180	615	150	558	138	140	92	102	423
438	219978	221305	171146	171315	114	414	116	170	599	122	622	146	136	105	130	446
439	219587	220273	172375	171649	96	374	111	123	630	130	594	154	132	115	107	416
440	220208	220949	171379	171153	101	387	124	150	567	135	614	156	136	86	112	408
441	219608	221491	171583	171198	92	402	130	128	581	143	651	157	129	93	116	398
442	219412	221341	171151	171788	131	393	127	129	604	132	614	164	126	93	130	459
443	219817	221146	171493	171090	96	415	120	128	601	131	630	149	122	117	127	436
444	220184	220294	171757	171575	99	424	107	143	596	115	598	122	132	128	82	436
445	220989	220123	171959	170619	104	411	110	129	634	127	576	135	119	119	109	407
446	219987	221104	171489	171009	101	414	135	147	603	128	599	147	131	103	92	409
447	220155	220393	172035	171102	100	394	120	144	638	121	584	163	144	118	133	426
448	219989	220102	171676	171795	101	395	108	161	646	145	630	122	135	117	116	411
449	219802	220709	171902	171191	111	400	130	129	617	130	587	149	111	107	102	427
450	219451	221295	171830	171326	110	413	104	140	588	163	606	134	127	102	116	464
451	220424	219801	171916	171539	105	394	103	150	602	132	636	129	144	112	96	426
452	219849	221030	171337	171460	96	433	133	124	599	141	567	153	146	98	121	437
453	220594	220359	170918	171762	105	414	117	141	545	139	616	179	132	74	100	406
454	220267	221354	170630	171332	96	381	119	125	602	139	582	134	125	101	117	429
455	220017	220523	170966	172205	95	381	95	143	627	139	559	155	146	95	120	432
456	220318	219843	171986	171333	87	375	113	133	577	142	617	179	135	102	109	459
457	220421	220979	170598	171542	113	396	105	151	605	123	563	149	133	119	102	406
458	219667	220761	171717	171288	87	434	117	146	612	133	596	135	130	90	116	405
459	220267	220564	171472	171083	101	397	127	147	592	117	627	177	130	108	99	371
460	221026	220377	170734	171243	117	404	103	138	600	141	608	139	151	103	121	415
461	220418	220987	170902	171211	99	414	122	141	556	124	585	139	122	101	123	444
462	220708	220042	171438	171574	106	421	120	150	596	137	591	147	130	109	133	415
463	220677	220263	171216	171251	104	421	109	121	631	119	596	140	141	105	135	451
464	221132	220083	170798	171461	103	436	112	139	566	142	594	164	141	95	102	433
465	220146	220155	171737	171533	113	393	121	140	618	129	566	168	141	92	110	408
466	220230	220501	171562	171334	104	375	98	132	604	121	561	151	118	106	119	401
467	220521	220838	171004	170971	102	431	82	146	620	116	579	145	141	96	133	435
468	220615	220622	170942	171463	88	401	118	128	586	140	631	168	147	111	118	430
469	221376	219814	170900	171378	104	443	121	148	580	102	603	144	129	92	113	412
470	220747	221007	170074	171622	101	409	121	117	605	148	591	151	141	99	108	432
471	220820	219827	171399	171387	111	438	117	126	572	127	597	144	131	102	108	399
472	221180	219869	171162	171166	99	410	119	148	605	159	611	134	142	124	102	419
473	220983	220709	170319	171584	93	444	122	146	599	145	602	136	125	94	108	400
474	220542	220539	171140	171397	103	435	111	169	557	144	609	154	139	105	138	441
475	220670	220624	170911	171363	114	423	135	144	594	133	558	140	132	106	139	427
476	220853	220277	171021	171393	86	414	125	153	588	138	607	154	126	117	108	416
477	221720	220371	171159	170325	103	434	118	145	616	113	587	136	141	102	98	400
478	221376	220615	170551	170963	116	414	129	148	635	117	640	155	124	94	120	377
479	221928	219637	170617	171435	109	400	96	126	600	128	617	132	126	87	115	433
480	221390	220567	170478	171119	96	404	123	140	606	150	531	164	125	95	118	425
481	220309	220692	171111	171373	90	431	117	153	610	115	626	166	124	116	118	409
482	221220	220739	170819	170635	124	423	117	161	620	138	587	144	137	122	107	424
483	221046	220980	171175	170471	107	408	122	134	620	134	635	146	128	107	123	443
484	221115	220929	170916	170672	116	396	90	144	582	142	565	160	141	88	121	399
485	221358	220382	170961	170869	93	431	107	155	588	133	573	141	124	90	123	416
486	221329	220917	170645	170798	115	443	126	120	580	132	579	128	110	102	114	417
487	220994	221056	170514	171012	88	435	119	122	607	112	574	132	136	92	121	438
488	220899	220839	170803	171202	98	374	141	133	576	111	599	156	116	112	113	436
489	221052	221205	171335	169894	107	395	113	144	627	137	562	132	139	93	138	401
490	221264	220685	170999	170517	114	418	116	139	564	122	645	157	128	121	119	423
491	221042	221107	170838	170557	104	415	120	158	625	110	610	165	138	101	98	437
492	220982	220763	171524	170181	110	407	117	178	575	114	591	105	144	104	117	414
493	221340	221439	170816	169825	90	472	146	134	598	153	621	137	132	99	108	434
494	220339	221630	171446	170173	107	434	111	143	603	129	563	148	131	84	130	427
495	221674	221119	171017	169705	90	425	122	152	560	121	544	163	155	79	111	421
496	221351	221361	171054	169835	113	436	107	130	590	143	577	141	146	89	123	441
497	221437	220849	170907	170284	115	414	122	152	599	107	581	155	112	108	117	386
498	221261	221987	170478	169873	111	432	117	141	595	155	605	116	148	94	137	416
499	220734	221437	171188	170310	100	437	123	160	634	126	612	129	138	114	109	445
500	221443	221259	171415	169509	90	442	106	143	654	135	588	154	114	109	129	441

## Sheet: Schones Interspecies
	Ancestral base count				Base change count (ancestral->current)
Position	A	T	C	G	T->A	T->C	T->G	C->A	C->T	C->G	G->A	G->T	G->C	A->T	A->C	A->G
-500	215510	215999	167365	167848	139	732	183	169	882	197	914	193	196	146	179	705
-499	215479	217307	166262	167736	120	767	189	209	850	190	875	206	209	129	165	734
-498	214855	217464	166555	167911	145	751	180	182	846	216	888	194	190	135	176	742
-497	215229	216688	166889	168004	127	752	189	175	880	183	867	191	194	132	178	759
-496	214738	216866	167079	168159	145	714	181	180	795	194	858	181	193	130	195	763
-495	216114	216423	166682	167634	138	734	172	183	868	199	858	186	183	136	158	735
-494	214995	217273	166177	168380	141	773	173	182	896	203	839	177	204	128	182	705
-493	214863	216196	167526	168281	114	764	175	167	894	199	877	203	220	147	184	772
-492	215242	216858	167501	167250	123	730	188	195	851	185	880	201	225	129	209	719
-491	216175	215866	167328	167470	126	774	185	177	945	217	924	171	202	134	181	744
-490	215600	216011	167602	167533	131	777	170	182	896	217	880	176	215	129	191	724
-489	215527	216291	166804	168213	118	760	171	179	887	186	840	190	180	149	199	735
-488	215578	216180	167651	167372	142	743	186	183	828	194	859	183	191	142	157	736
-487	215041	216908	168065	166896	129	736	205	219	858	179	960	193	217	129	178	771
-486	214610	216958	167445	167919	136	770	170	183	827	191	916	198	189	147	184	736
-485	214741	216832	167235	168119	117	758	175	165	887	184	862	195	215	149	190	736
-484	215062	216601	167356	167944	117	730	181	207	858	201	905	178	196	139	190	763
-483	215024	217276	167036	167519	144	749	190	192	869	178	893	194	190	128	183	747
-482	215128	216419	167499	167816	133	763	153	177	894	192	888	188	188	136	179	747
-481	214602	216781	167517	167978	132	762	172	180	903	192	934	186	199	110	166	714
-480	214701	216597	167606	167958	131	732	177	190	853	171	840	184	198	131	186	801
-479	215228	216139	167491	168053	133	748	184	202	874	200	901	172	194	122	188	749
-478	214494	216326	167603	168529	129	771	185	181	860	224	887	198	194	133	177	793
-477	214900	216144	168162	167781	156	720	180	187	799	222	919	210	203	161	177	745
-476	215105	216562	167513	167881	140	783	200	201	808	210	888	171	217	144	158	762
-475	214761	215999	167918	168405	121	743	194	180	868	208	867	178	195	126	183	717
-474	215245	217063	167132	167579	141	751	172	200	842	181	953	177	189	151	179	799
-473	214902	216419	167580	168105	141	744	187	176	812	206	892	220	207	125	188	792
-472	214296	216361	167944	168515	112	735	187	175	930	186	887	189	191	140	171	759
-471	214325	216683	167779	168438	124	746	163	186	908	197	871	185	210	144	178	776
-470	214654	216197	168194	168131	134	716	180	188	853	198	911	162	208	124	182	780
-469	214192	216882	167969	168120	135	770	207	174	828	207	816	175	191	118	174	766
-468	214609	216548	168158	167860	136	755	184	182	879	179	823	190	207	142	192	721
-467	213910	216289	168043	168961	130	724	180	199	926	212	900	181	185	141	173	741
-466	214801	216571	168236	167556	152	789	166	189	848	194	866	183	208	131	179	784
-465	215292	215438	168340	168028	118	701	189	167	893	190	876	201	188	150	177	712
-464	214298	216008	168281	168484	131	812	188	171	859	190	854	184	224	134	198	821
-463	214377	216248	167898	168583	126	745	177	186	859	178	904	192	167	127	177	736
-462	214352	216874	167500	168406	120	751	198	181	825	202	869	178	208	145	199	782
-461	214313	215858	168759	168083	134	766	171	187	872	205	908	200	195	135	177	712
-460	214554	215888	168364	168219	112	736	161	178	921	197	849	191	206	141	166	776
-459	214618	216108	168604	167761	129	770	188	162	893	204	896	199	191	152	157	742
-458	214091	216461	168609	167874	148	751	180	179	903	184	951	192	197	144	164	745
-457	214908	215801	168608	167851	139	713	177	186	913	184	892	177	194	117	195	701
-456	214685	216387	168213	167913	129	680	165	182	870	191	837	197	190	130	173	764
-455	215190	215476	168070	168467	133	746	155	184	849	184	849	206	168	145	189	764
-454	215337	215814	168129	168028	153	747	194	169	919	188	841	198	218	127	187	767
-453	215671	215705	168096	167815	136	795	170	168	929	184	930	163	187	132	191	722
-452	215026	215599	168282	168295	146	803	194	163	954	198	850	206	189	148	191	736
-451	214251	215960	168279	168771	144	768	200	181	821	168	868	191	187	132	174	768
-450	214853	216639	168134	167701	138	735	178	186	890	168	844	168	220	116	174	745
-449	214300	215368	168818	168762	120	747	197	187	885	199	891	173	196	151	160	794
-448	215300	215912	167953	168260	123	718	174	195	883	193	909	187	184	137	192	753
-447	214803	215724	168460	168396	133	749	180	198	879	191	880	176	192	140	177	762
-446	215380	215966	167908	168076	130	760	155	218	893	210	911	192	209	147	189	755
-445	214675	215242	168315	169185	141	782	178	210	903	209	916	198	217	144	182	745
-444	214773	215259	168733	168687	159	698	185	192	927	197	922	195	209	112	171	706
-443	215080	215242	168526	168576	112	733	170	200	848	210	854	200	204	131	189	771
-442	215792	214271	168396	168979	128	742	173	161	886	217	902	167	189	139	189	788
-441	214627	215370	168697	168809	143	704	168	189	911	185	911	192	183	134	167	724
-440	215442	214924	168580	168608	115	762	186	181	870	206	870	182	200	154	179	728
-439	215329	214684	169280	168290	132	796	197	198	902	168	891	193	194	138	171	707
-438	214643	215197	169139	168635	115	765	183	189	911	182	865	172	165	130	188	763
-437	215199	216069	168411	167916	117	726	197	188	869	224	853	203	193	120	173	756
-436	215707	214575	168833	168399	142	728	164	180	911	199	853	201	225	142	153	736
-435	215139	215951	168085	168299	141	753	190	191	870	190	875	191	226	142	176	712
-434	215213	215524	168459	168284	135	754	196	167	861	204	956	182	189	132	169	709
-433	215090	215602	168062	168814	132	777	170	190	863	199	918	189	217	127	180	717
-432	214530	215878	167874	169194	127	727	167	212	872	212	911	186	205	116	179	696
-431	214634	216065	168370	168417	132	720	189	179	859	182	862	168	192	141	169	728
-430	215601	215191	167867	168820	133	808	191	177	896	194	843	207	195	140	181	707
-429	215645	215021	167817	169139	134	767	185	188	894	196	881	212	203	122	176	780
-428	215941	214713	168462	168408	129	763	178	186	871	189	894	179	184	137	177	730
-427	215565	215128	168138	168671	138	721	186	175	905	224	918	177	211	142	186	761
-426	215179	215162	168242	169038	106	781	175	194	824	233	878	184	208	126	150	754
-425	216654	215557	167501	168088	136	727	197	187	927	215	837	172	171	127	178	758
-424	215880	215184	167688	168990	139	744	172	164	883	196	883	179	194	126	163	745
-423	215245	215298	168102	169131	124	750	181	192	841	199	883	181	197	130	193	741
-422	215888	215513	167365	169038	138	779	188	178	888	186	879	209	200	116	175	722
-421	215933	215707	167399	168724	120	702	176	189	829	202	876	178	183	129	205	715
-420	215928	215064	167528	169267	119	708	172	185	885	184	868	187	194	144	176	761
-419	216016	215313	167874	168661	133	783	183	194	879	198	864	191	204	133	186	696
-418	215535	215327	167780	169269	134	738	180	170	871	192	900	225	168	152	179	789
-417	215720	215383	168513	168381	131	790	178	206	919	214	867	177	217	144	185	827
-416	215953	215543	168075	168372	103	710	182	187	873	209	930	211	209	130	164	731
-415	215667	215660	167395	169164	138	709	177	189	872	200	926	183	208	137	210	735
-414	216584	214950	167150	169245	136	758	173	193	891	212	860	180	209	130	182	693
-413	215810	215672	167723	168841	131	742	176	199	887	181	950	170	178	135	184	743
-412	216033	215511	167425	169195	125	746	172	189	848	198	833	211	204	108	184	754
-411	215761	215662	167167	169539	130	718	181	193	902	209	886	182	198	139	174	693
-410	216497	215043	167908	168658	115	796	160	169	889	189	897	174	202	126	161	729
-409	216517	214096	168665	168950	144	815	156	166	849	197	938	181	197	152	172	753
-408	216349	215306	167643	168940	111	696	180	183	914	190	904	194	164	132	174	774
-407	216106	215250	167691	169183	133	743	166	185	900	207	905	178	198	119	191	692
-406	216524	214377	168353	168906	137	702	160	190	838	209	855	189	189	150	166	784
-405	216421	215264	167369	169148	126	716	197	167	868	209	909	178	212	138	170	784
-404	216234	215703	167302	169149	131	756	192	169	858	185	850	165	225	124	194	776
-403	216153	215236	168380	168617	108	774	185	187	909	208	903	213	184	117	181	750
-402	216705	215491	167885	168305	167	733	178	203	859	190	942	210	204	129	172	687
-401	216621	215415	167821	168612	127	748	207	187	882	201	899	186	173	112	164	768
-400	216225	214547	168543	169129	145	708	187	196	821	198	835	176	235	134	165	798
-399	216971	214990	167497	168975	142	760	177	180	882	206	925	176	228	119	159	775
-398	216300	215565	167272	169403	127	717	171	214	867	188	947	197	178	127	185	763
-397	216496	215629	167406	169075	129	741	174	208	855	177	871	209	196	141	183	749
-396	216462	215829	167267	169043	152	701	187	191	887	200	905	200	204	136	192	698
-395	217108	215457	167607	168558	119	776	181	179	838	190	916	190	197	120	185	723
-394	216932	215590	167396	168741	137	755	164	180	854	199	892	172	201	109	169	702
-393	217223	215105	167281	169099	122	705	191	191	888	197	884	185	208	131	140	745
-392	216986	215287	167312	169156	123	761	145	146	847	212	857	181	195	131	179	765
-391	217080	215241	167304	169064	142	723	191	183	879	185	868	186	191	138	202	763
-390	217019	215435	168078	168118	113	677	199	178	907	199	891	186	183	133	183	755
-389	216874	215081	168124	168682	124	724	155	174	888	208	891	192	200	128	173	693
-388	216505	215261	167564	169420	125	689	183	195	851	213	881	181	180	131	163	728
-387	217365	215497	167813	168113	136	706	164	172	888	220	899	201	187	134	172	728
-386	217207	215241	167473	168865	135	708	156	180	907	199	881	208	187	120	187	706
-385	216970	216147	166549	169173	127	759	156	178	913	190	885	209	199	117	172	695
-384	217573	214769	167447	169128	122	709	184	179	882	220	888	181	188	128	176	729
-383	216344	215775	167799	168995	148	743	168	205	931	201	867	195	199	113	162	797
-382	218068	214997	167465	168447	147	712	166	197	841	188	885	168	175	134	171	756
-381	216987	215340	167786	168918	117	796	182	190	863	192	918	180	192	136	187	722
-380	217738	215165	167468	168603	126	751	160	172	885	206	915	195	218	121	164	754
-379	217752	215177	167071	169096	122	692	199	182	872	188	882	194	215	151	211	722
-378	218088	215207	167247	168528	128	717	190	177	889	227	858	183	192	117	192	801
-377	217499	215440	167422	168675	129	743	184	191	906	235	923	193	215	134	184	802
-376	217115	215548	167381	169164	128	724	205	175	894	231	948	198	194	134	153	762
-375	217904	216192	166804	168285	132	753	202	191	856	197	892	197	164	132	161	753
-374	218166	215782	167140	168077	132	698	139	184	873	195	906	191	185	109	193	759
-373	218159	215437	167773	167862	139	732	172	164	896	192	861	198	201	140	189	755
-372	217603	214620	167795	169243	151	740	175	201	910	195	915	195	192	125	185	748
-371	218021	215627	167217	168431	144	729	212	175	862	188	895	194	185	134	187	769
-370	217793	215186	167182	169165	127	751	165	193	845	191	881	192	197	140	201	721
-369	218518	214249	167448	169085	133	707	193	174	870	195	856	210	202	140	204	781
-368	218446	215624	167330	167936	140	753	196	185	865	208	839	184	204	138	183	738
-367	218303	215259	167107	168750	126	714	193	189	860	209	909	195	208	133	178	696
-366	218525	215040	167349	168549	122	718	187	198	807	200	852	185	203	135	167	734
-365	218657	215496	166987	168230	126	753	185	189	872	178	840	180	189	129	186	771
-364	218846	214752	167044	168791	139	651	199	178	891	196	874	183	172	116	185	768
-363	218451	215333	167327	168299	148	756	152	169	901	185	819	195	204	143	180	765
-362	218594	215173	166553	169180	140	719	182	209	881	191	806	206	194	151	174	804
-361	217924	215788	166472	169348	120	699	201	187	824	186	837	198	191	122	176	782
-360	218328	215330	167081	168718	132	758	188	159	897	204	892	180	191	133	182	755
-359	218284	215600	166952	168681	134	745	166	177	856	207	902	184	181	145	172	685
-358	218091	215651	166603	169144	128	748	176	196	863	193	897	174	184	138	170	791
-357	218279	214963	166990	169263	121	734	174	203	879	192	889	185	179	156	178	753
-356	218572	214770	167169	169099	124	740	158	169	828	207	840	204	204	155	169	711
-355	219447	215057	166237	168818	131	702	168	201	872	192	866	206	174	133	171	731
-354	218310	215052	167123	169146	130	696	170	174	887	212	887	167	200	145	167	715
-353	219118	215016	166677	168854	141	733	201	176	883	188	894	165	209	136	195	718
-352	219728	215561	166636	167841	120	752	166	190	921	201	893	211	212	149	192	750
-351	219592	214211	166717	169291	145	756	158	170	866	180	914	174	185	126	184	709
-350	219515	215751	166450	168106	128	708	172	205	881	204	906	154	181	136	192	727
-349	219042	215717	166112	169078	133	714	158	160	846	206	935	166	212	136	163	697
-348	218896	215135	166727	169148	132	724	156	191	842	233	887	180	206	140	168	731
-347	219498	214974	167120	168379	129	683	173	191	822	203	970	185	180	123	179	729
-346	219155	215203	167210	168348	144	705	178	175	861	195	902	181	166	130	189	748
-345	219539	215123	166985	168247	130	722	163	213	838	168	849	162	186	127	197	719
-344	220001	214454	166915	168678	139	712	191	180	913	214	930	181	195	148	175	791
-343	218718	215592	166652	168953	121	730	169	195	882	201	891	206	171	145	167	740
-342	219438	215187	166341	168987	119	716	183	166	857	195	873	195	201	120	184	791
-341	219643	214982	166545	168851	134	705	176	196	863	192	906	151	209	144	196	722
-340	218586	215437	166692	169231	134	740	186	187	870	192	895	182	179	150	179	746
-339	219647	214970	166466	168897	134	734	173	179	826	222	885	215	187	118	170	740
-338	219346	215021	166822	168889	127	734	206	186	886	157	930	167	209	142	175	753
-337	219244	214379	167174	169278	139	772	172	209	820	195	918	177	223	131	156	727
-336	218623	215385	166512	169444	163	740	187	204	852	208	839	185	204	135	181	783
-335	219615	214263	166399	169669	141	744	172	186	888	216	915	186	200	153	167	724
-334	219834	215030	166377	168792	157	714	181	191	835	182	878	203	189	138	158	738
-333	218715	215404	166629	169189	136	742	184	187	854	178	879	191	185	131	190	737
-332	218442	215268	166814	169503	149	736	195	187	886	205	900	207	188	117	180	754
-331	219492	215963	166367	168217	131	748	169	201	859	220	860	173	207	140	194	736
-330	218525	215665	166748	169203	121	689	173	178	929	232	904	165	202	138	181	763
-329	218758	214698	166927	169730	119	770	168	190	862	187	827	180	170	128	195	738
-328	218390	215081	167120	169604	147	712	159	179	905	191	849	197	207	121	152	737
-327	218283	215564	167148	169286	114	699	189	173	902	202	857	195	193	137	171	774
-326	218897	215248	167271	168848	144	745	189	178	883	193	883	191	162	123	191	738
-325	218907	215617	166595	169195	130	747	173	181	877	197	872	187	192	116	171	760
-324	219297	215220	166416	169433	124	769	182	189	858	219	837	187	173	122	179	791
-323	218447	215145	167040	169890	112	739	175	163	854	195	852	175	203	139	184	797
-322	218401	215111	167524	169368	112	703	166	200	889	217	927	192	204	142	169	811
-321	218712	215055	166975	169750	118	743	159	178	908	196	876	179	193	151	202	756
-320	219056	215868	166798	168836	117	733	192	182	922	188	870	175	206	126	176	760
-319	218147	215107	167555	169769	125	726	186	170	874	202	862	214	196	135	191	806
-318	218822	215775	167055	168843	113	719	194	185	822	187	892	200	161	141	169	739
-317	218238	215765	167801	168799	116	738	178	182	847	217	827	202	216	135	191	726
-316	218217	215898	167773	168782	134	729	193	155	869	184	852	182	176	140	168	767
-315	218330	215386	166962	169899	128	708	161	186	894	190	932	184	226	140	189	782
-314	218045	215652	167282	169704	134	792	185	184	794	211	880	186	230	120	186	661
-313	218284	215205	168042	169150	130	747	190	185	941	191	862	188	204	127	191	770
-312	217998	215584	167874	169330	125	745	174	171	850	231	849	179	195	143	159	760
-311	217794	216211	167616	169227	115	784	201	185	856	226	900	164	190	134	166	734
-310	218456	214641	168320	169361	111	751	189	174	898	207	847	184	178	129	189	758
-309	217479	215524	168082	169674	137	783	188	193	900	200	803	183	229	147	186	763
-308	218299	215747	167463	169268	111	726	177	162	829	190	926	206	191	112	181	796
-307	217553	215059	168477	169763	140	753	197	207	866	176	905	186	223	127	205	746
-306	217444	215627	167983	169694	116	741	181	188	852	221	901	199	187	124	188	742
-305	217640	215982	167256	170049	117	738	166	177	879	182	878	183	205	111	213	754
-304	217168	215128	169226	169356	142	754	162	182	858	207	942	174	213	126	202	774
-303	216296	216711	168671	169175	119	756	180	189	925	218	898	191	186	140	202	746
-302	216990	216217	169035	168577	129	726	187	177	926	230	943	171	188	136	189	705
-301	217038	216080	168548	169146	142	738	175	186	876	205	864	191	209	129	169	762
-300	217395	216145	168319	168980	131	776	170	185	931	202	887	182	213	123	188	756
-299	216416	216092	168468	169779	130	773	209	192	910	189	842	184	220	129	175	741
-298	216790	216511	168690	168777	127	731	163	169	883	224	903	204	199	126	204	757
-297	215901	216633	168647	169595	143	763	188	186	846	198	864	200	228	124	192	741
-296	216537	216600	168737	168945	125	737	160	203	865	172	873	175	215	127	206	785
-295	215941	216169	168805	169874	108	784	190	193	895	215	863	203	204	137	167	765
-294	216199	216421	168906	169236	123	741	158	180	843	217	846	188	208	136	173	759
-293	216643	216475	169172	168642	139	753	182	190	886	219	882	192	194	135	187	784
-292	216006	216915	169346	168689	115	783	194	172	860	216	878	190	218	137	178	729
-291	215251	216538	169486	169669	109	761	173	181	841	217	840	188	205	132	169	752
-290	216091	216324	169183	169277	133	753	172	191	844	202	873	204	209	133	190	776
-289	215729	216639	168866	169645	108	730	185	178	813	213	852	182	203	129	177	734
-288	216101	216812	168927	169065	161	712	213	176	912	199	858	188	218	131	186	783
-287	215969	216884	169752	168304	126	815	174	211	905	203	885	190	219	136	208	763
-286	216146	216205	169162	169357	129	758	178	192	873	201	851	210	241	137	142	762
-285	216088	216366	169065	169309	134	725	171	182	876	211	861	185	215	129	181	743
-284	215666	217140	168905	169091	144	721	198	183	862	192	877	200	197	134	181	729
-283	215748	216394	169374	169315	129	726	164	172	861	202	855	181	186	121	177	762
-282	215930	216785	169367	168716	123	759	156	201	859	195	864	206	202	137	199	803
-281	215639	216857	169466	168866	125	746	168	201	850	185	860	184	226	116	182	795
-280	216162	216406	169382	168855	130	766	175	169	862	195	863	199	188	132	166	743
-279	214542	216906	169645	169723	115	764	145	170	918	196	877	171	207	133	184	742
-278	215792	217196	168949	168876	112	760	167	178	866	223	830	158	191	143	163	764
-277	214519	217070	169610	169542	116	770	167	205	905	205	926	202	210	132	162	782
-276	215609	216617	169604	168866	132	780	169	188	860	193	849	196	211	115	171	816
-275	215490	216825	169229	169256	139	771	176	198	826	212	863	211	213	125	161	750
-274	215387	216136	170127	169177	124	793	188	179	915	160	877	177	191	150	178	718
-273	215600	217032	169624	168616	146	807	186	182	896	190	834	189	188	123	168	752
-272	215841	216428	169831	168774	129	763	193	189	896	193	840	210	213	117	174	738
-271	215880	216435	169654	168909	124	737	167	178	838	190	849	157	210	137	191	720
-270	216005	216687	169481	168630	122	755	185	189	880	214	817	196	218	132	177	739
-269	215314	216672	170023	168893	123	749	189	217	842	200	911	182	203	125	177	772
-268	216260	216648	169359	168655	115	716	186	198	869	198	905	173	181	129	189	766
-267	215407	216704	169945	168795	125	751	188	216	895	207	848	180	198	130	191	755
-266	215841	216374	170053	168681	154	756	168	197	830	193	821	200	209	127	183	707
-265	215352	216546	169532	169488	118	755	177	192	897	192	916	184	194	138	153	790
-264	215480	216814	169861	168764	116	753	174	172	867	212	836	167	220	140	164	727
-263	214917	216727	169826	169412	130	780	183	178	876	205	885	189	192	125	197	783
-262	215929	216422	169459	169106	121	750	187	184	922	198	875	184	224	129	180	748
-261	216301	216245	169512	168925	135	775	166	172	869	222	910	180	200	152	185	732
-260	215159	216103	169824	169886	129	758	157	170	890	236	855	201	233	142	191	739
-259	216528	215978	169430	169067	150	694	152	177	858	189	873	185	217	149	180	732
-258	216188	216676	169250	168791	108	781	180	178	890	196	891	212	219	126	164	741
-257	216878	215727	169428	168910	116	764	189	174	901	232	853	186	198	145	194	736
-256	216110	216360	169370	169089	124	783	187	185	883	202	876	200	208	131	171	766
-255	215332	216385	169728	169533	145	691	177	193	884	190	863	201	225	156	150	740
-254	215793	216740	169207	169225	115	736	168	187	890	223	837	182	191	137	181	781
-253	216181	215880	169537	169354	117	758	170	175	847	200	913	196	195	128	171	750
-252	216728	216479	169164	168552	130	797	189	199	841	193	869	196	212	130	221	798
-251	216790	216109	168792	169229	164	822	185	195	831	191	830	172	182	122	203	752
-250	216249	216047	168872	169783	149	733	164	176	909	201	868	186	210	136	172	714
-249	216387	216188	168767	169708	130	742	180	180	823	178	866	174	196	132	183	725
-248	215983	215995	169392	169671	123	742	167	167	936	184	862	200	189	153	176	734
-247	216265	216050	169187	169533	154	706	172	193	870	191	838	176	194	122	191	734
-246	216914	215830	168797	169555	139	702	181	172	794	206	840	200	195	131	158	753
-245	216175	215599	169183	170136	136	724	167	179	908	196	872	174	199	132	194	742
-244	216868	215321	168652	170239	131	778	164	163	894	224	916	187	220	123	202	717
-243	217154	215590	168112	170147	130	787	183	185	883	210	880	184	199	142	175	760
-242	217110	215989	168464	169567	134	753	188	181	858	213	828	188	209	157	200	752
-241	217170	215526	168399	169950	141	763	162	160	836	198	853	169	211	124	164	768
-240	216982	215794	168274	169974	133	712	199	191	866	186	861	174	188	123	168	747
-239	217348	215414	168046	170306	129	717	184	159	854	207	905	209	215	137	185	746
-238	217564	215582	168231	169803	131	759	168	190	856	207	879	217	200	121	189	771
-237	217975	215522	167607	170080	115	751	176	198	890	232	847	183	209	133	176	742
-236	217618	214946	168475	170144	144	766	171	195	896	183	878	193	194	139	218	729
-235	217498	214747	168879	170243	117	754	181	212	862	201	876	191	200	167	194	736
-234	217451	215029	168262	170555	127	728	172	167	882	196	874	180	192	133	193	736
-233	216959	216255	168248	169880	124	758	165	183	866	160	847	199	196	131	180	751
-232	217510	215861	167452	170536	133	688	168	187	885	193	907	190	194	142	171	783
-231	217154	215114	168132	171021	133	693	171	163	856	191	870	183	227	132	175	713
-230	217420	215144	168200	170601	134	735	185	210	854	190	820	183	200	131	198	765
-229	217225	215637	167789	170842	130	745	187	187	846	214	897	183	196	133	173	753
-228	217093	214894	168083	171383	125	709	172	194	876	188	922	210	205	137	167	735
-227	217544	215002	168016	170923	125	733	185	172	865	213	865	199	208	139	224	725
-226	217409	215185	167941	170913	128	790	170	179	837	198	853	186	205	138	155	755
-225	217461	214733	168498	170870	142	763	166	162	818	215	866	179	220	130	201	779
-224	216801	215211	168615	170899	133	728	189	193	888	201	846	178	172	119	187	783
-223	217615	215114	167743	171023	137	716	162	152	820	201	821	189	200	150	183	774
-222	217166	215351	167231	171789	141	696	174	192	815	194	906	181	208	131	163	725
-221	216975	215286	168280	171114	134	724	177	194	840	204	842	190	188	126	177	790
-220	217413	215528	168050	170663	112	717	203	188	795	206	873	180	212	135	198	721
-219	216656	215606	168133	171234	136	734	215	196	851	192	863	176	210	159	178	726
-218	217104	215936	168141	170562	121	715	200	181	865	196	842	195	201	140	186	701
-217	217840	215539	167952	170495	143	737	176	187	783	210	853	176	224	114	169	733
-216	217378	215180	168289	171010	137	732	168	188	850	183	869	184	198	115	184	736
-215	217890	215233	167586	171127	117	713	180	170	814	181	880	176	211	126	180	764
-214	217835	214856	168624	170552	133	719	195	167	881	189	888	188	217	146	183	715
-213	217645	215172	168205	170816	138	715	173	175	878	213	835	190	188	117	179	705
-212	217838	215041	167670	171221	143	714	188	146	811	189	863	185	199	136	178	748
-211	217445	215069	168127	171222	114	716	180	166	874	220	904	173	180	141	163	776
-210	217968	215322	167588	170953	111	690	189	211	852	198	835	173	206	125	206	730
-209	217733	215240	167936	171111	138	751	172	178	811	201	873	152	208	120	160	740
-208	217393	215260	168293	171029	147	709	168	180	822	196	830	183	199	131	168	743
-207	217839	214846	168262	171065	135	687	191	152	860	195	872	179	191	122	180	764
-206	217706	215131	168624	170603	148	707	201	189	825	201	851	187	193	132	185	722
-205	217731	215797	168143	170469	130	771	175	185	816	203	856	184	203	125	154	727
-204	218535	214773	167788	171028	136	689	180	182	824	221	876	195	196	120	203	752
-203	217432	215315	168464	170949	119	760	189	187	851	192	853	182	181	125	156	748
-202	217774	215496	168204	170734	107	708	154	186	860	181	898	201	213	126	169	830
-201	217681	215355	168184	171065	120	757	162	155	878	176	860	201	196	132	186	725
-200	218336	214493	168855	170542	118	741	158	181	855	198	837	189	204	133	155	775
-199	217840	215981	168103	170241	140	763	180	185	789	196	872	209	202	123	181	730
-198	217355	215747	168733	170351	127	694	197	189	866	213	883	188	199	135	161	712
-197	217410	215927	168670	170130	126	698	167	175	849	197	791	184	201	114	180	704
-196	217737	215675	168404	170377	143	742	157	202	862	197	875	202	211	116	179	681
-195	217796	216411	167670	170285	116	751	193	171	849	181	843	152	189	139	198	756
-194	217184	216376	168497	170226	136	737	179	179	845	200	863	181	199	124	185	710
-193	217994	215905	168093	170299	131	667	181	183	834	179	807	161	183	134	167	719
-192	218391	215788	168472	169618	125	693	200	168	866	204	851	192	171	133	187	764
-191	217985	215671	168254	170465	142	707	191	156	835	186	872	181	214	136	176	707
-190	218669	215770	168033	169813	123	678	179	182	862	161	819	183	202	131	173	738
-189	218311	215670	168534	169805	135	758	166	183	849	195	877	181	210	142	197	706
-188	218539	216077	168534	169252	112	725	180	199	864	195	824	198	217	127	166	776
-187	219171	215380	168335	169642	126	729	171	196	846	189	868	197	190	141	189	720
-186	218055	216236	168145	170166	154	712	192	178	897	192	864	171	177	128	176	744
-185	218644	216509	167963	169379	103	721	183	182	852	193	850	162	192	132	157	739
-184	218589	216993	167491	169483	139	734	169	199	848	202	826	172	209	151	185	727
-183	218970	215359	168923	169402	132	734	151	193	853	209	859	189	208	132	194	726
-182	218665	216691	168243	168973	116	729	144	188	828	198	886	166	185	132	173	704
-181	218568	216403	168477	169077	134	699	188	177	881	192	800	200	196	111	177	770
-180	218777	216345	167862	169598	143	727	176	181	854	194	861	193	194	146	168	717
-179	219031	216323	167992	169169	130	791	196	165	857	213	893	177	186	142	145	696
-178	219019	215891	168417	169152	128	746	173	182	822	188	850	196	208	131	170	732
-177	219118	216336	167555	169480	143	690	181	176	864	192	822	187	184	129	195	689
-176	219697	216115	167345	169481	132	671	174	194	818	203	878	165	199	140	213	781
-175	218970	216407	168113	169100	102	682	157	179	844	182	877	201	185	123	198	682
-174	219975	216511	167465	168799	133	743	167	177	867	200	875	200	182	137	206	734
-173	219123	216485	167743	169400	123	728	183	189	842	177	841	186	191	121	173	749
-172	219368	216443	167583	169445	125	690	165	195	845	198	872	197	196	133	167	773
-171	219008	216976	168063	168844	118	704	177	204	821	214	809	182	194	139	199	709
-170	219479	216420	168093	168907	133	747	160	188	894	190	846	164	202	127	179	742
-169	219770	216892	167244	169052	125	737	149	195	802	209	837	175	190	134	186	723
-168	219715	216499	167263	169392	137	675	193	185	808	161	804	176	201	127	192	739
-167	220082	217044	167051	168663	112	757	204	164	845	187	853	187	199	130	174	739
-166	220341	216812	166543	169121	126	690	154	201	838	190	812	194	192	124	160	749
-165	219954	216400	167443	169155	113	734	169	158	833	193	854	202	210	124	175	755
-164	219898	216347	167194	169523	153	724	186	182	854	191	854	210	168	118	192	787
-163	220002	216642	167171	169202	135	730	175	168	836	207	845	205	200	125	165	736
-162	220344	216560	166642	169419	140	717	184	190	903	192	898	209	174	130	176	728
-161	220472	216248	166984	169215	127	720	155	180	791	211	867	166	174	147	185	672
-160	220363	216867	167091	168610	150	668	175	195	793	211	814	187	217	134	166	702
-159	220203	215851	167148	169715	137	768	155	202	851	164	847	169	190	144	199	747
-158	220471	216179	167046	169389	118	714	197	177	806	195	856	180	199	124	173	807
-157	220887	216418	166794	168975	107	740	190	196	826	215	841	181	212	144	206	743
-156	220460	216458	167235	168864	131	684	168	191	802	194	845	190	186	136	190	740
-155	220719	216452	166540	169322	105	739	171	175	848	206	854	187	206	157	167	742
-154	221191	216277	166231	169344	132	659	177	180	795	178	849	192	199	117	194	755
-153	220605	216762	166172	169590	130	703	178	181	837	214	814	183	207	132	175	722
-152	221013	216673	165964	169475	106	723	187	200	829	199	839	207	180	130	176	737
-151	221366	216643	165753	169490	144	713	166	180	790	192	876	182	182	120	173	741
-150	221479	215680	166337	169688	128	665	194	177	832	229	910	166	221	140	183	771
-149	222040	216409	165432	169336	119	732	197	192	794	204	854	172	193	133	179	742
-148	222295	215893	165886	169227	130	755	201	210	839	216	852	148	203	126	178	748
-147	222050	216065	165487	169643	119	706	176	183	847	180	871	234	207	126	189	745
-146	221941	215621	165734	169988	139	771	184	178	810	188	873	176	191	120	158	733
-145	222065	215318	166017	169771	135	734	177	196	772	213	885	171	188	120	182	729
-144	221624	215849	165889	169944	143	734	163	188	864	195	896	177	209	126	189	726
-143	221645	216645	165184	169893	109	713	148	176	796	181	879	161	196	119	175	760
-142	222576	215396	165035	170462	135	738	179	184	863	164	823	192	198	140	192	770
-141	222371	215547	165632	169942	131	711	166	200	857	180	864	228	206	147	167	708
-140	222393	215449	165292	170266	141	704	160	193	792	220	806	192	203	125	159	691
-139	223025	215631	164739	170055	125	726	184	189	775	203	831	188	189	133	191	768
-138	222749	215408	165147	170189	118	697	165	187	857	206	853	191	185	138	192	761
-137	222562	215047	165894	169993	140	665	170	188	830	211	855	186	199	130	180	736
-136	223386	215209	164846	170163	136	692	187	209	755	158	844	163	203	136	208	700
-135	222655	214850	165482	170563	130	685	159	190	803	204	881	151	200	129	171	740
-134	223072	215189	165111	170200	143	757	178	187	811	204	841	206	182	124	167	738
-133	222613	215346	165044	170631	108	723	188	200	839	194	860	183	199	123	172	748
-132	222739	215251	164965	170621	96	727	156	184	849	195	818	200	191	121	182	714
-131	222787	215405	165021	170423	129	739	185	198	856	202	892	178	206	128	180	759
-130	222931	215817	164715	170135	121	748	180	165	827	222	837	197	199	146	171	720
-129	222976	215260	164981	170455	116	702	180	184	839	182	864	190	209	142	188	726
-128	222909	216214	164343	170327	106	715	187	176	843	212	858	189	187	139	189	731
-127	222960	214976	165999	169878	143	714	187	190	780	207	834	181	203	142	163	752
-126	223940	215871	164638	169354	121	721	165	188	801	213	824	191	218	131	193	768
-125	223511	216168	164618	169544	123	677	183	182	821	208	879	154	221	130	179	776
-124	223016	216367	164840	169611	134	708	165	179	819	207	823	191	193	141	173	701
-123	224069	216718	164168	168892	118	673	176	166	855	204	942	175	207	117	183	758
-122	223887	215922	164264	169816	135	721	171	171	844	203	866	173	203	138	184	742
-121	224309	215824	163779	170049	107	733	181	160	906	192	828	162	207	139	188	718
-120	223704	216581	163394	170204	132	720	176	150	808	200	885	196	196	124	185	789
-119	224482	215484	163686	170303	125	734	188	170	834	178	905	196	181	155	188	758
-118	223682	215897	164574	169914	135	736	163	183	835	175	915	195	190	125	184	739
-117	224615	215475	163970	170054	138	694	162	178	861	192	865	201	218	131	175	788
-116	224437	215539	163691	170405	137	681	184	167	844	196	866	177	208	137	183	719
-115	224073	216020	163791	170374	139	742	180	203	811	201	894	201	214	134	157	718
-114	224603	215757	163999	169947	129	722	189	180	809	218	907	177	207	136	171	741
-113	224644	216111	162856	170542	122	722	195	191	832	187	865	185	187	126	180	761
-112	224090	215690	163586	170844	127	738	178	188	837	214	856	207	186	145	203	766
-111	224271	215721	163469	170712	122	752	179	190	836	203	895	189	232	136	173	739
-110	224330	215455	163402	171111	131	702	180	178	882	199	853	165	205	133	162	700
-109	224360	215291	163656	170996	124	724	194	157	822	216	843	206	213	151	172	697
-108	223953	215608	163341	171496	129	698	171	176	867	205	855	192	184	133	173	729
-107	224340	216167	163300	170553	116	692	187	172	819	193	931	176	185	141	204	738
-106	224278	216393	163114	170571	126	737	175	172	843	210	856	189	222	118	197	689
-105	224956	215088	163098	171211	118	728	184	177	848	186	910	212	224	161	169	721
-104	225018	215602	163021	170750	123	738	174	176	868	195	866	175	162	136	195	681
-103	225178	216327	162396	170566	132	731	180	181	896	185	893	215	216	133	164	721
-102	224735	215678	162284	171700	132	707	147	189	834	191	924	186	174	130	167	736
-101	224662	215500	162534	171786	128	640	170	216	813	199	852	192	192	134	174	758
-100	225228	214922	162603	171666	147	724	175	165	856	208	920	192	215	158	178	704
-99	225214	214680	162287	172221	130	692	188	167	877	186	847	175	221	158	178	758
-98	224721	214883	162504	172345	124	697	195	164	876	166	861	187	197	135	169	716
-97	224757	214996	162675	172083	127	749	162	189	835	222	932	211	198	133	154	755
-96	225306	214257	162495	172506	110	735	168	182	836	190	906	198	209	131	181	733
-95	224872	214721	161953	173066	113	736	156	187	863	173	896	201	186	133	183	723
-94	225284	214832	162050	172511	142	697	191	181	827	220	909	199	200	153	167	708
-93	226612	214264	161534	172411	134	690	170	177	833	180	890	191	210	154	171	724
-92	226261	213605	161263	173688	128	692	191	185	851	206	930	215	214	124	164	697
-91	225151	213204	161500	174836	137	728	168	181	875	192	913	182	232	129	156	770
-90	225367	213382	161150	174810	122	691	178	176	821	190	936	194	177	130	123	728
-89	225255	212963	161158	175354	112	730	164	208	852	228	930	210	223	110	157	700
-88	226683	212762	161095	174214	118	711	171	188	832	205	933	241	188	116	191	721
-87	226453	212497	160932	174967	135	664	172	184	879	163	942	178	191	117	160	741
-86	226319	213142	160294	175054	137	739	143	203	874	173	956	161	199	127	168	692
-85	227312	211555	160816	175214	126	665	148	184	898	213	911	211	200	136	183	714
-84	227962	213080	160027	173770	131	684	162	169	853	223	878	191	210	129	139	724
-83	230690	211295	158916	174018	142	687	163	169	887	181	934	204	220	146	155	752
-82	228696	210391	158207	177669	132	689	148	165	868	192	898	197	207	141	169	691
-81	229327	207724	158567	179347	126	706	170	190	929	176	992	181	204	108	172	752
-80	228781	206903	159643	179696	107	697	172	200	841	199	902	205	205	145	165	721
-79	228848	205162	160093	180915	121	698	168	187	894	177	937	191	187	133	160	654
-78	228757	204684	160640	180993	132	686	180	203	887	185	990	187	210	143	200	733
-77	229082	204351	159688	181903	125	643	177	192	851	186	958	177	218	141	146	715
-76	229113	203666	160418	181877	111	724	168	194	872	182	955	205	211	122	160	708
-75	229512	202339	160841	182478	112	690	178	210	902	213	990	201	218	113	178	715
-74	229248	201395	160518	183986	138	703	175	203	895	201	953	178	221	110	182	772
-73	229009	200193	161276	184706	137	650	176	180	844	200	990	192	194	115	156	741
-72	228743	198669	161819	185987	108	691	149	192	848	213	943	185	227	134	160	724
-71	228321	197887	162300	186731	127	665	167	184	850	193	990	180	229	119	182	766
-70	228255	196761	162322	187946	133	677	159	205	814	209	1015	195	234	134	177	736
-69	227938	195867	163414	188021	121	698	170	171	906	206	897	209	209	106	191	689
-68	228262	194444	163586	188979	120	709	178	185	875	194	939	181	209	92	162	711
-67	227397	194288	163524	190144	87	663	183	159	829	207	964	201	235	111	174	710
-66	227208	192873	164747	190491	110	681	176	220	911	197	982	195	245	110	189	692
-65	226696	192794	164739	191180	103	707	176	198	824	215	940	183	190	116	170	718
-64	225932	191565	165916	191954	117	710	169	189	896	213	951	181	212	127	186	708
-63	225179	191601	165330	193376	114	708	160	186	782	177	989	206	189	118	177	732
-62	224311	190727	166713	193687	127	736	171	195	829	204	958	187	209	101	162	694
-61	223601	190393	166561	194891	125	711	180	172	824	231	1057	201	202	116	169	662
-60	223329	189012	168057	195134	116	673	177	171	790	190	942	200	215	98	192	760
-59	222974	189474	168282	194774	124	735	170	162	842	215	942	175	204	101	187	690
-58	221618	187693	169645	196601	131	699	178	172	903	223	1024	186	274	130	151	728
-57	221445	187667	169798	196720	114	719	175	183	797	213	946	190	231	100	177	736
-56	220513	186746	169813	198597	102	730	169	178	786	196	962	186	225	127	171	729
-55	219455	186125	170902	199134	117	682	161	175	832	215	982	192	215	116	169	745
-54	216751	185351	172977	200640	106	756	173	168	924	211	946	196	258	114	198	768
-53	217693	186071	172786	199121	120	715	177	198	873	220	1033	183	204	133	149	802
-52	216349	186409	173757	199141	125	720	186	186	851	234	1006	185	249	105	185	767
-51	216127	187918	173390	198246	130	735	184	185	871	202	926	192	228	110	174	720
-50	215546	186908	173677	199567	120	740	141	193	867	218	921	194	241	103	184	753
-49	214764	187203	174546	199171	135	737	183	194	844	235	973	201	221	111	168	747
-48	213780	186774	175042	200162	128	710	167	180	914	210	953	211	231	109	163	778
-47	213836	186178	175526	200224	106	743	173	192	827	245	996	196	248	107	175	784
-46	212725	185739	176698	200687	96	738	153	181	855	234	992	166	242	113	158	830
-45	212077	186516	176261	200935	124	776	155	179	841	203	892	192	222	110	199	721
-44	210603	185409	177164	202791	123	719	141	192	868	211	970	183	218	109	167	720
-43	210494	184967	177931	202526	109	744	159	170	872	227	924	214	226	110	159	810
-42	209826	185529	178637	201872	92	742	177	168	866	223	931	202	224	102	182	797
-41	209308	185643	178644	202337	111	723	188	185	866	230	959	167	242	106	177	744
-40	208265	185458	179987	202342	95	769	148	195	869	215	949	176	279	111	198	750
-39	208673	184998	180288	202061	110	787	143	189	880	225	1001	201	239	114	171	773
-38	207296	185159	180087	203364	107	765	194	185	823	226	1002	198	228	108	215	768
-37	206736	185140	180390	203698	119	803	176	167	860	216	961	196	233	110	200	750
-36	206150	184503	181596	203646	105	729	171	167	839	230	1019	208	250	102	175	798
-35	205641	184122	182167	204062	103	802	165	186	838	239	947	191	237	86	182	768
-34	203906	184772	183311	204047	128	770	136	187	863	226	917	180	239	111	152	805
-33	204490	185313	183330	202966	120	805	181	192	888	231	928	193	231	121	167	789
-32	204305	185946	182698	203187	121	808	170	184	884	235	972	208	218	118	177	749
-31	203802	185361	183677	203338	90	786	175	180	876	233	973	174	246	104	176	719
-30	202246	186055	184204	203625	118	771	181	193	850	198	949	194	258	112	186	800
-29	201890	185339	185088	203801	111	771	190	170	938	232	956	190	241	123	166	805
-28	201981	185382	185666	203002	109	790	182	199	897	227	918	191	267	114	178	823
-27	201593	185797	185095	203533	128	802	161	181	925	207	971	206	277	110	196	797
-26	200948	185300	185727	204022	114	745	151	157	917	201	1005	183	248	105	163	810
-25	200355	185643	186297	203820	98	787	176	165	919	248	949	190	256	113	202	809
-24	200315	184922	187460	203459	109	798	173	194	887	241	972	183	256	97	183	824
-23	199075	185368	188108	203554	118	787	167	179	912	254	963	198	242	90	158	801
-22	199364	184503	188287	203906	112	758	184	182	867	256	972	168	236	112	191	795
-21	198739	186331	187639	203383	118	826	174	175	894	222	958	192	234	126	186	831
-20	198079	185885	189103	202988	110	815	166	178	900	252	919	203	223	107	176	832
-19	197354	186678	189990	202006	109	757	179	192	931	232	936	165	263	107	146	800
-18	196808	186060	189778	203451	100	778	196	159	942	252	995	187	245	104	187	813
-17	196777	186226	190151	202940	98	744	182	183	877	259	981	173	255	105	163	800
-16	196589	186142	190549	202774	116	764	174	169	890	225	924	163	260	102	179	795
-15	195238	186335	191685	202836	102	770	155	200	859	216	932	187	233	115	178	717
-14	194914	186030	192039	203049	98	803	174	183	910	239	910	178	256	115	196	828
-13	194562	187193	192550	201693	97	779	191	191	915	264	952	186	216	111	178	772
-12	194346	186958	193408	201296	110	772	197	203	952	198	952	212	248	97	186	838
-11	193939	186961	194229	200865	101	806	163	198	913	238	907	179	260	119	173	799
-10	193740	187787	194047	200431	107	755	196	165	885	222	919	185	251	107	172	815
-9	192391	188204	194496	200929	120	794	184	175	906	234	986	187	238	111	179	829
-8	192392	188396	194745	200472	105	734	193	177	921	241	922	191	262	110	179	794
-7	191914	188879	195066	199972	103	806	166	186	935	227	930	178	247	91	165	778
-6	191718	188951	195842	199324	108	814	202	221	903	239	1018	154	216	120	166	775
-5	191366	188783	196729	198966	105	754	156	180	948	225	851	171	224	110	184	818
-4	191520	189149	196579	198608	100	850	200	182	969	252	943	181	213	111	179	759
-3	190271	189557	197239	198884	99	768	187	190	887	260	976	173	249	123	170	801
-2	190750	189885	196720	198560	91	825	194	180	926	189	899	184	248	93	164	788
-1	190065	189448	197418	198926	98	768	196	183	943	242	891	193	210	91	155	828
0	190952	190028	197509	197375	96	750	179	195	1014	251	894	180	229	96	179	767
1	189952	190038	198238	197681	121	757	190	191	917	258	968	191	233	112	154	811
2	189268	190608	198645	197409	122	810	170	183	959	240	950	203	256	113	204	793
3	189441	190759	199143	196521	107	808	159	195	926	254	953	204	252	109	196	821
4	189114	191446	199021	196177	103	757	189	186	901	264	951	172	250	114	203	829
5	188829	191588	199878	195452	96	756	162	181	885	267	943	187	245	95	177	785
6	188798	192167	199461	195357	111	814	151	172	899	272	986	199	237	107	167	766
7	187556	192959	200131	195206	101	840	161	181	972	232	942	191	246	108	173	767
8	187742	193273	200018	194804	101	853	181	185	881	259	951	200	270	103	169	744
9	186561	193745	200978	194507	91	860	164	189	956	285	915	187	261	118	174	783
10	186786	193038	202103	193904	127	783	189	176	920	254	929	184	260	91	192	784
11	187524	194229	201432	192742	111	776	157	176	971	230	936	163	245	107	181	780
12	186362	195393	201273	192909	118	800	188	199	968	246	900	203	235	121	184	782
13	186216	195419	201248	193019	139	762	194	196	934	268	887	184	243	90	188	781
14	186361	195580	201781	192205	115	772	192	173	925	260	904	197	242	113	167	773
15	185737	196509	202634	191067	92	769	174	210	924	234	912	193	242	118	164	770
16	186582	196510	202688	190206	100	830	229	194	1027	243	895	189	221	108	183	796
17	185617	197298	202277	190730	105	854	180	163	981	239	891	186	250	109	150	817
18	185650	198184	202646	189445	107	742	175	173	908	235	865	178	214	111	188	736
19	185618	197899	203038	189381	107	804	177	206	955	249	926	164	238	127	185	781
20	185574	198040	203004	189314	98	781	186	176	967	226	897	171	247	107	182	760
21	185385	199244	202570	188745	100	814	178	197	877	240	924	182	254	113	166	808
22	185053	199646	202883	188394	115	814	174	191	960	207	920	209	212	108	176	786
23	185138	199813	204053	187069	100	824	182	201	898	231	896	160	231	115	191	822
24	185199	201246	203468	186187	120	777	173	160	980	236	848	178	211	93	192	816
25	184860	201543	202986	186693	122	717	149	180	988	226	913	174	234	101	211	755
26	185188	201589	202821	186483	124	770	192	168	972	236	911	191	236	115	187	770
27	184295	202510	203796	185397	96	765	175	187	965	218	850	177	252	102	168	813
28	185197	202366	202857	185538	106	797	185	201	951	263	940	185	226	104	172	800
29	184582	203053	203402	184880	93	811	163	171	1005	246	859	172	245	103	182	788
30	184062	203321	204335	184236	92	761	176	180	971	261	905	177	225	115	170	710
31	184743	204138	203839	183305	104	785	153	210	980	253	879	183	225	122	159	722
32	183973	204219	204187	183565	110	792	173	183	947	239	909	192	232	111	175	780
33	183994	205751	204010	182204	117	799	181	193	1007	243	909	189	286	121	154	744
34	182979	206392	204324	182201	102	847	178	189	950	246	872	188	218	105	177	736
35	185023	206529	203458	180958	99	816	150	165	951	245	822	176	213	119	180	810
36	184616	206956	203079	181155	109	768	160	214	970	252	902	185	216	105	180	758
37	185206	207475	202602	180573	100	790	175	193	1000	234	886	171	216	118	180	728
38	184800	208041	203391	179559	94	778	189	169	950	234	842	195	225	117	192	703
39	185445	208126	202743	179567	95	748	181	184	897	218	855	177	235	112	177	768
40	184430	209643	202777	178991	119	806	196	189	964	228	802	201	202	107	166	764
41	184718	209597	202677	178778	93	749	180	196	1010	217	857	198	246	117	192	772
42	184814	211613	201966	177443	109	784	178	182	994	202	851	153	224	93	177	757
43	185112	210871	201956	177962	120	751	148	195	995	231	877	200	210	116	171	739
44	185583	211769	200675	177869	104	725	179	197	940	218	893	185	210	100	172	737
45	185447	213569	200581	176268	106	829	228	199	944	240	840	180	227	93	183	747
46	185709	214439	199370	176277	115	801	209	188	987	248	860	190	230	106	157	724
47	185886	214530	199152	176218	102	777	180	176	947	222	852	191	194	116	168	748
48	185785	214294	200283	175461	109	721	164	182	965	224	905	194	233	108	188	736
49	184706	214387	201484	175214	106	793	163	197	959	277	884	175	193	112	175	727
50	183916	215098	202439	174304	107	768	159	173	918	225	906	177	222	111	153	730
51	184641	217138	200848	173013	114	736	176	181	947	232	846	191	213	138	146	674
52	184896	217779	200380	172633	109	766	175	156	899	262	871	191	185	102	197	806
53	186079	219258	199090	171209	121	755	191	211	964	209	920	210	189	125	177	674
54	185974	220613	197431	171592	119	717	166	197	923	221	873	177	204	107	157	715
55	186065	220772	197389	171312	101	734	193	178	974	236	778	189	197	129	187	734
56	186888	221884	196829	169902	99	703	166	203	1002	254	841	191	202	125	171	737
57	187771	222483	196090	169201	108	736	163	197	980	213	840	176	192	130	160	704
58	188269	222847	195772	168613	113	722	162	188	935	220	828	166	223	124	162	737
59	189012	223549	194872	168035	112	701	152	186	927	228	908	186	211	116	185	757
60	189232	224679	194461	167102	102	751	183	188	975	198	820	204	205	115	191	708
61	189297	225315	193887	166935	134	768	176	178	950	235	820	209	185	126	178	675
62	191001	225557	192216	166648	117	713	196	168	947	223	859	185	223	129	196	700
63	190729	226905	191847	165921	125	732	187	202	1014	201	845	192	221	130	177	657
64	192622	227119	191009	164617	116	712	159	206	969	233	868	187	191	133	167	706
65	192093	227577	190159	165494	99	772	186	214	985	205	827	199	216	153	191	723
66	193211	228102	189949	164068	131	728	156	202	966	220	915	171	180	117	169	709
67	194322	227981	189098	163928	112	750	170	183	1029	215	807	181	210	127	151	676
68	196120	228244	187992	162954	135	766	173	177	965	213	811	194	211	134	166	689
69	196895	229686	186144	162541	120	731	148	197	944	212	908	196	200	113	165	734
70	197634	228867	186699	161995	127	695	165	216	982	174	890	194	205	120	178	723
71	199237	228632	185211	162065	127	712	176	184	947	230	883	208	209	135	157	739
72	199996	229608	184026	161389	113	706	180	186	926	198	848	197	195	115	165	700
73	200509	230098	183395	160953	115	750	170	218	972	203	862	177	185	134	174	707
74	201324	229080	182923	161632	121	706	175	187	942	227	850	224	193	125	151	737
75	202714	229563	181931	160750	128	691	168	201	992	187	837	199	212	111	164	677
76	203498	229103	182405	159930	140	695	198	207	950	207	863	175	201	131	154	681
77	205055	229393	181104	159353	135	705	178	193	951	200	836	192	190	121	185	710
78	206662	229589	179383	159235	114	710	176	201	976	228	813	198	192	124	164	677
79	207721	230773	176577	159771	110	757	157	201	944	216	886	178	208	114	181	671
80	209030	227631	177280	160956	138	748	161	199	919	200	954	198	185	112	167	655
81	209294	228575	176759	160145	108	724	181	204	936	226	905	194	188	123	199	654
82	208888	227732	177459	160821	114	683	176	204	917	235	879	203	190	128	177	697
83	210040	227543	176896	160433	128	749	153	188	897	203	839	207	175	120	188	682
84	209503	227614	176777	161010	126	715	173	198	960	209	896	177	196	123	176	669
85	210157	226750	177054	160785	141	699	177	182	979	212	877	176	182	140	161	729
86	209971	227376	177054	160287	132	729	165	205	916	209	848	211	195	127	172	707
87	211107	227722	174980	160808	129	757	185	183	902	168	861	183	207	117	157	701
88	211561	226796	174649	161584	137	715	172	198	870	198	845	154	210	149	160	705
89	212507	227232	173895	161037	123	722	159	219	889	209	843	199	190	154	168	767
90	212354	226668	173813	161747	108	725	189	167	925	218	854	197	216	122	152	748
91	212564	226598	174313	161100	143	722	175	186	922	201	873	202	196	112	173	702
92	212801	227039	173258	161424	129	692	165	194	916	199	894	210	205	158	176	755
93	212442	226219	173724	162083	140	758	175	178	854	206	808	195	217	97	184	765
94	212917	226276	173658	161644	134	726	168	174	882	178	799	179	177	115	156	712
95	213045	226185	173124	162080	147	751	162	178	896	229	889	181	197	121	178	706
96	212527	226204	173606	162021	114	707	185	172	902	203	875	176	196	117	167	687
97	213665	226432	173023	161303	124	806	179	208	934	187	879	185	172	123	187	708
98	214089	226375	172077	161943	122	733	161	194	878	220	838	209	166	126	162	715
99	214562	227110	170462	162294	133	717	163	180	926	210	943	180	204	119	162	724
100	214077	225317	171775	163193	145	747	189	196	856	215	880	174	202	128	161	651
101	214518	225420	171446	163031	145	702	177	186	916	212	807	200	192	128	154	694
102	215128	225509	171176	162577	132	697	181	191	939	202	888	175	194	136	166	745
103	214556	225614	171100	163112	153	748	174	214	889	197	893	181	199	158	216	713
104	214665	225143	171029	163437	144	741	174	182	872	194	859	212	195	103	174	721
105	214534	225038	171313	163341	142	744	187	204	870	210	888	200	216	137	178	685
106	214885	224978	171322	162991	129	771	173	178	906	196	834	176	187	115	186	712
107	214072	225570	171500	163023	122	718	175	192	880	204	854	173	169	122	161	694
108	214416	225142	171046	163620	133	703	182	190	834	199	866	161	181	132	176	679
109	215812	224629	169901	163763	142	727	192	161	861	216	847	196	192	121	186	705
110	215133	225216	170394	163390	160	713	171	186	857	223	810	174	227	136	182	728
111	215539	225105	169793	163775	158	731	189	170	912	189	825	192	220	114	167	728
112	215287	224803	170178	163928	139	698	162	197	874	181	812	195	221	107	168	722
113	215046	225993	169062	164036	114	685	175	214	903	220	878	183	189	119	144	739
114	214921	224032	170687	164458	146	770	188	194	866	184	877	181	187	125	187	706
115	215242	224600	170066	164085	128	691	172	183	798	210	828	183	201	126	167	716
116	215705	224399	170017	163972	130	773	166	192	893	204	793	176	217	103	150	749
117	215497	224709	170020	163752	128	751	172	185	874	188	829	179	214	136	162	731
118	215204	224584	170109	164044	149	711	212	216	857	199	859	179	182	127	165	729
119	216088	224490	168677	164612	137	757	183	184	869	179	878	163	181	122	188	726
120	215553	224062	169135	165068	118	745	184	203	852	202	872	190	174	118	167	707
121	215140	224143	169324	165243	123	736	196	170	880	220	807	155	198	124	155	668
122	215730	223573	169453	164976	140	716	135	196	827	228	800	194	196	152	176	720
123	215089	223800	170246	164601	108	711	178	209	896	186	823	197	174	144	166	668
124	215021	223802	170103	164639	140	734	181	185	825	209	816	196	206	147	157	754
125	215698	223876	169691	164312	122	756	174	190	807	213	839	160	197	145	192	739
126	215399	223200	169938	165018	108	741	149	195	850	183	836	176	204	124	189	762
127	215028	223576	169937	165013	147	737	160	180	882	213	854	183	196	113	166	724
128	214606	223458	169906	165558	117	740	190	179	839	209	823	179	180	145	186	721
129	215218	223293	170443	164623	125	720	167	192	841	227	797	169	192	119	179	723
130	215614	223426	170020	164457	151	725	190	176	818	217	838	181	214	113	159	761
131	215096	223525	170157	164726	134	732	177	177	865	209	854	180	185	124	161	694
132	215251	223233	170040	164997	104	708	165	195	862	193	829	182	225	140	178	703
133	215365	223364	170239	164513	141	760	168	183	855	221	815	201	193	123	168	739
134	215330	222570	170485	165061	135	773	170	188	866	222	808	168	212	125	168	743
135	214963	222921	170136	165420	118	757	181	198	840	194	840	159	196	116	175	725
136	214854	222662	170389	165437	134	739	181	175	810	203	876	190	183	128	184	689
137	215778	222843	169464	165089	126	739	166	172	894	199	790	181	200	109	199	730
138	215689	222572	169667	165345	127	733	162	186	843	207	832	177	206	135	191	689
139	215413	222684	170263	164819	128	754	165	216	866	166	875	194	205	129	150	691
140	215771	222223	169771	165399	134	733	167	195	839	172	821	155	193	141	160	706
141	215294	222599	169502	165692	118	717	177	174	862	213	835	176	207	142	188	659
142	215644	222776	169390	165324	142	721	176	186	891	189	789	173	170	129	171	784
143	216505	221958	169031	165645	132	737	187	191	806	153	845	186	211	131	182	739
144	216057	221702	169452	165927	135	772	173	200	904	219	832	160	226	138	184	689
145	215515	221834	169363	166339	112	705	189	171	842	198	799	203	197	138	172	737
146	215721	222138	169911	165263	168	712	209	191	854	190	822	201	209	121	183	727
147	215944	221733	169568	165749	131	754	171	215	830	234	810	198	180	118	176	783
148	215814	221627	169457	166086	134	762	182	193	827	196	804	184	199	137	177	777
149	215571	221715	169893	165933	137	729	193	144	920	191	820	191	186	134	184	707
150	216162	221772	169274	165773	123	710	162	177	864	199	884	187	235	131	175	674
151	215411	222076	168960	166560	138	787	174	178	833	187	868	172	201	125	168	720
152	215751	221757	168806	166738	138	687	185	212	885	202	848	186	180	154	175	708
153	216473	221637	168612	166201	135	775	183	191	831	191	871	207	207	113	165	722
154	215845	221421	168958	166691	126	754	191	186	881	190	859	174	211	128	182	725
155	215935	221009	168992	167009	100	737	173	181	833	200	828	176	171	137	167	726
156	215172	221627	169708	166444	120	769	191	201	827	197	782	190	191	130	182	695
157	215190	221559	169430	166561	131	756	165	180	913	189	874	157	195	128	187	668
158	216141	220694	168991	166886	122	703	185	194	786	211	849	168	192	117	175	722
159	215799	220688	169337	166797	151	777	212	174	860	191	809	182	216	134	166	678
160	215728	221004	169148	166854	146	754	178	168	838	235	838	168	193	138	169	667
161	216648	220018	168697	167342	138	753	162	180	810	191	873	193	216	128	185	731
162	216434	220070	168574	167643	113	720	203	186	831	200	783	174	197	138	160	765
163	216146	220528	169313	166671	115	683	153	188	878	203	839	156	187	156	188	753
164	216508	220065	168430	167605	125	752	166	167	891	181	811	184	180	136	171	686
165	216112	220442	168984	167157	127	750	164	203	838	217	811	191	189	124	175	707
166	216450	219926	169512	166762	151	705	197	199	840	207	807	158	192	122	167	736
167	216079	220442	168403	167765	135	736	178	177	887	198	850	187	190	133	152	733
168	216239	219774	168428	168290	147	701	158	197	899	198	839	195	202	118	167	710
169	217103	219611	168410	167567	150	702	179	205	828	190	826	189	199	127	182	720
170	216413	219247	168919	167944	129	732	176	195	838	201	829	174	198	143	168	725
171	215894	219494	168830	168419	124	757	197	188	843	190	823	182	185	135	156	756
172	216207	219574	168837	168056	135	761	182	208	857	203	843	163	168	118	173	722
173	215879	219866	168707	168148	150	736	196	183	827	199	791	173	194	121	175	744
174	215901	220104	168662	167990	125	727	194	185	890	216	815	169	185	134	171	745
175	216633	219154	169496	167352	130	755	190	197	894	189	822	185	208	126	139	767
176	216355	218799	169143	168271	133	790	187	183	843	184	799	200	200	123	157	729
177	215650	219994	168669	168291	137	720	183	186	882	186	860	193	183	130	181	756
178	215773	219423	168813	168553	133	698	191	193	842	180	860	197	207	127	174	682
179	215868	219287	168993	168407	132	716	193	172	837	193	861	190	179	123	175	743
180	215965	218488	169082	169025	124	750	176	185	859	208	831	185	191	132	187	808
181	216529	218672	169062	168394	131	757	205	188	856	173	847	172	178	152	166	716
182	215095	219371	169091	169030	137	686	179	187	823	190	800	184	190	136	176	724
183	216126	219018	168981	168392	147	752	194	179	861	202	848	165	178	146	184	722
184	215189	219092	169571	168753	134	702	192	196	862	201	810	184	215	136	173	738
185	214945	219134	169646	168814	142	741	196	185	876	222	853	173	209	123	197	737
186	215832	219382	169167	168208	114	672	188	181	878	190	862	179	206	132	167	756
187	215622	218264	169755	168963	126	760	174	173	848	181	846	177	196	148	171	760
188	215131	218880	170050	168467	120	776	208	192	870	201	849	200	175	129	160	782
189	215608	217685	170087	169131	118	728	194	201	803	210	852	173	184	124	169	757
190	216043	217767	169732	168907	132	754	201	179	852	197	863	159	166	147	176	717
191	215603	218356	170187	168223	140	753	166	184	854	231	842	183	209	125	193	712
192	215075	218732	170374	168190	147	726	173	190	877	198	857	186	191	137	168	744
193	214900	218191	169488	169723	138	698	183	199	786	197	883	183	175	115	157	775
194	214856	218074	170522	168853	125	725	175	170	857	191	859	154	198	124	142	741
195	215021	218547	170248	168461	160	740	191	188	877	203	882	166	223	111	168	730
196	214814	217934	170496	168955	124	734	169	182	865	199	839	181	175	145	191	722
197	214901	218572	169769	168879	144	692	180	157	862	211	850	168	176	112	161	701
198	214701	218113	170024	169356	134	730	180	192	949	204	808	190	207	107	175	778
199	215258	218003	170592	168337	120	678	178	182	831	188	848	166	208	127	160	679
200	215270	217876	170281	168737	120	715	183	183	870	194	886	190	192	141	140	701
201	215378	217768	170255	168790	134	792	160	195	834	208	888	162	199	147	181	759
202	215062	218241	170950	167895	121	699	186	184	896	213	858	174	214	137	184	748
203	215237	218428	170432	167942	130	741	176	197	927	190	916	203	198	123	192	727
204	214751	218118	170528	168533	142	720	169	194	856	217	855	207	191	135	189	737
205	215374	218045	170259	168287	126	732	168	200	838	176	863	174	197	117	176	734
206	215320	216847	171048	168736	135	726	171	178	854	195	871	166	216	134	197	723
207	215099	218143	170495	168258	122	787	174	165	828	204	821	180	220	119	180	762
208	214423	218195	170982	168415	150	780	172	186	900	196	936	212	219	123	183	712
209	215040	217789	170750	168452	135	737	182	190	878	170	850	210	220	127	174	781
210	214188	218083	171327	168453	132	719	183	169	893	201	843	175	194	137	171	736
211	214896	217891	170978	168276	126	759	160	184	868	193	869	178	195	120	172	728
212	215128	217770	170880	168277	133	808	183	184	836	188	870	194	203	128	207	768
213	215116	217746	171109	168057	125	748	172	167	882	201	847	188	194	136	160	722
214	214315	218862	171044	167732	167	781	161	202	844	200	831	168	172	114	163	718
215	214606	218378	171119	167876	134	784	192	171	840	185	851	179	203	111	186	719
216	213708	218536	171460	168219	142	691	166	171	867	217	867	186	218	129	176	771
217	215029	217568	171407	167849	133	746	184	182	868	193	805	157	187	130	169	730
218	214494	217578	171256	168476	123	741	190	174	837	193	893	194	189	129	174	728
219	214369	217870	171084	168447	140	761	156	209	888	214	848	174	189	131	160	738
220	215003	217663	170889	168089	122	735	220	198	812	199	843	200	188	109	169	769
221	214322	218145	170754	168432	140	717	193	188	843	185	906	188	203	136	159	739
222	214651	218107	170959	167931	134	712	180	187	875	183	836	174	189	148	184	732
223	215211	217517	170300	168580	161	702	192	163	812	195	874	173	189	140	187	701
224	214975	217906	170726	167980	136	723	157	185	870	216	861	186	185	133	185	761
225	214764	218302	170690	167733	115	720	183	183	861	197	825	188	182	122	198	786
226	215217	218215	170349	167710	133	738	153	169	851	200	911	168	186	154	169	735
227	214670	217932	170798	168083	136	756	195	179	850	190	871	184	209	151	170	729
228	214708	218197	170364	168186	128	733	199	187	860	218	804	168	204	131	172	741
229	214182	218070	170770	168405	125	734	189	178	916	198	857	175	196	119	167	755
230	214823	217821	170648	168133	129	740	188	210	874	209	802	187	199	121	171	715
231	215145	217441	170645	168177	136	764	193	196	860	169	845	180	197	131	190	716
232	214863	217190	170758	168579	137	767	163	181	870	187	846	167	206	122	177	730
233	215412	217750	170240	167975	123	752	154	179	930	197	875	176	187	117	167	726
234	215132	216848	170828	168525	121	766	166	177	904	216	848	198	201	126	196	708
235	215018	217767	170657	167813	133	729	155	193	904	207	866	158	203	154	194	738
236	215064	217927	170502	167780	131	763	195	202	899	193	831	163	199	139	187	721
237	214258	217703	170611	168658	126	780	208	182	845	202	893	182	178	139	175	795
238	214675	217766	170659	168129	138	712	183	198	831	197	885	171	210	107	159	727
239	214872	217623	169940	168821	130	729	177	183	884	203	885	189	208	144	194	755
240	214641	217076	170795	168681	129	688	191	169	845	194	882	161	201	122	183	700
241	214965	217063	170313	168795	129	696	186	207	886	182	873	178	189	119	164	736
242	215367	216909	170064	168822	132	741	164	197	830	214	839	191	174	155	171	773
243	215181	217449	170121	168381	125	737	160	204	896	204	902	197	208	130	187	734
244	215394	216823	170057	168916	141	774	174	186	924	193	817	180	217	121	169	731
245	215719	217111	169170	169131	129	755	158	182	850	218	878	177	197	111	162	724
246	215654	216825	169674	168881	135	676	192	191	923	215	936	206	195	110	181	750
247	215311	217075	169823	168894	125	735	180	180	862	193	901	192	178	133	164	774
248	215120	216645	169801	169508	131	739	165	189	848	190	834	174	191	133	175	745
249	215740	217027	169329	169006	130	692	158	173	853	199	887	164	203	129	172	723
250	215192	216833	169376	169809	144	697	177	195	839	204	879	198	196	121	164	746
251	215114	217117	169406	169516	139	763	194	217	818	199	906	186	193	145	188	746
252	215661	216648	169661	169182	126	790	166	189	888	196	862	185	213	139	217	708
253	214995	217057	169814	169181	124	754	187	193	842	189	911	208	196	134	177	784
254	215727	216742	169400	169207	152	746	203	166	888	197	891	189	178	126	164	750
255	215190	216581	169341	169937	139	712	157	182	887	203	869	187	201	140	178	738
256	215797	216690	169213	169318	138	723	163	177	863	189	876	214	177	142	205	765
257	215565	216874	169385	169130	146	747	163	170	895	209	869	189	193	123	185	743
258	215804	215996	169214	169903	151	736	158	200	881	190	846	178	183	120	176	761
259	215721	216460	169213	169517	134	771	174	213	867	213	909	187	203	127	177	745
260	216083	216964	168565	169293	121	722	171	170	870	184	892	211	198	131	187	738
261	215975	216151	168627	170153	136	756	179	185	811	193	891	176	223	123	186	717
262	215810	216123	168894	170150	129	800	186	179	887	215	865	182	194	139	188	800
263	216696	215837	168939	169419	130	731	186	173	874	168	886	203	201	132	183	708
264	216174	216368	168654	169673	129	700	219	173	876	203	892	175	195	122	184	786
265	215485	216316	169056	169959	152	739	184	180	850	199	886	166	192	136	166	761
266	215934	216116	169039	169674	127	788	200	184	910	208	880	183	197	131	179	716
267	216208	215766	168642	170254	131	731	186	189	788	203	889	206	217	120	161	726
268	216040	215586	169261	169981	127	733	187	180	889	194	889	179	199	118	183	750
269	215769	216078	169422	169547	133	697	160	200	858	217	845	187	188	110	176	701
270	216880	215601	168894	169481	135	753	197	178	845	189	880	188	216	136	174	773
271	216587	216220	168560	169466	149	785	198	192	869	192	841	200	207	123	181	710
272	215789	216141	169088	169738	122	751	172	180	915	221	886	180	206	132	168	697
273	215986	215668	169880	169288	132	772	186	205	887	192	895	191	195	133	197	747
274	216274	216332	168881	169269	124	777	209	175	843	176	901	178	196	130	180	785
275	216788	215524	168486	169931	136	774	190	175	922	192	866	202	193	129	188	778
276	215810	215731	169398	169816	138	698	197	194	925	240	893	162	207	132	176	773
277	216243	216358	168836	169431	130	779	185	204	901	214	880	197	203	129	195	807
278	216123	215512	169585	169711	122	760	203	187	870	192	857	187	182	138	158	764
279	216558	216583	168188	169682	141	715	174	203	843	209	870	178	189	139	155	801
280	216265	216080	169523	169103	125	744	154	178	880	216	846	168	190	128	177	750
281	215868	215645	169300	170121	138	776	207	179	870	188	897	195	178	134	170	807
282	216206	216541	169050	169054	138	768	190	180	872	205	925	189	208	136	181	724
283	215525	216127	169430	169791	132	691	188	167	860	192	960	202	173	136	169	754
284	216124	216300	169123	169316	117	739	154	226	853	205	903	169	206	147	186	693
285	215727	215894	169106	170224	127	749	204	175	852	217	877	209	187	144	174	726
286	216205	216436	169061	169205	143	727	185	186	880	166	900	211	201	124	205	794
287	216252	216718	168709	169219	147	724	170	170	881	206	837	178	222	125	183	741
288	216188	216164	168965	169692	144	786	182	199	874	197	882	181	206	127	180	787
289	215589	216378	169442	169556	150	785	179	167	885	211	851	187	199	132	185	746
290	216168	216088	169208	169392	111	774	183	177	940	194	864	165	216	121	169	713
291	216330	216842	168412	169218	132	720	206	184	899	221	888	190	203	124	194	769
292	215961	216598	169015	169201	136	748	173	196	831	184	893	195	202	142	191	783
293	216060	216075	169553	169164	133	741	178	222	880	207	938	196	224	141	166	754
294	216275	216301	168851	169397	135	713	179	197	845	190	888	186	224	146	168	756
295	215883	216525	169351	169014	122	721	173	207	884	191	877	192	210	123	170	797
296	215966	217242	168829	168813	132	753	185	162	852	210	894	192	191	120	159	771
297	215302	216780	169413	169312	120	731	183	187	893	201	835	173	211	131	175	785
298	215758	217490	169160	168457	142	734	180	190	893	190	871	196	190	149	194	751
299	215282	217094	169400	169124	111	774	193	168	912	199	868	192	198	127	179	749
300	215445	217598	169091	168737	136	692	200	219	917	226	876	205	221	106	177	770
301	214795	217779	169284	169035	125	770	195	189	841	204	843	181	213	142	169	786
302	215985	217512	168611	168739	129	753	151	174	892	200	832	192	184	153	199	693
303	215425	217540	168868	168945	148	776	176	181	950	209	891	167	168	138	159	732
304	215675	217637	169053	168346	135	788	166	197	835	188	851	196	203	122	180	780
305	214646	217911	170085	168000	132	733	200	203	878	202	851	191	187	115	184	737
306	215069	217902	168825	168910	153	728	172	194	892	229	902	190	196	114	174	768
307	214661	218304	169115	168590	115	734	211	167	889	188	891	182	191	138	207	731
308	214767	217850	169625	168438	136	773	186	178	898	195	845	225	187	125	163	739
309	214239	218216	169550	168661	143	767	210	200	861	225	915	192	187	140	190	793
310	215713	218385	168987	167598	116	722	165	178	887	203	908	196	201	135	183	728
311	215231	218169	169143	168114	132	727	194	198	918	198	856	187	222	107	161	714
312	215167	217748	169376	168358	132	719	214	162	846	185	853	231	214	139	184	717
313	215222	217790	169720	167938	129	747	166	169	910	211	887	199	198	121	192	749
314	215153	218294	169396	167773	140	770	164	179	858	204	840	181	164	134	190	761
315	214542	218990	169413	167679	126	733	150	181	889	209	894	199	192	152	159	738
316	215270	219149	168898	167252	142	719	197	199	878	178	834	185	178	122	174	726
317	214388	218520	170361	167383	134	765	172	188	921	207	864	174	210	116	172	804
318	215327	219170	168631	167494	100	759	171	182	917	199	886	206	182	127	187	768
319	214480	219339	169188	167551	140	808	188	181	904	190	874	177	202	138	173	761
320	214783	218551	169737	167522	129	727	175	192	878	203	876	194	202	138	197	735
321	214755	218988	169483	167269	148	734	207	164	897	197	813	163	202	111	182	770
322	213818	219301	169811	167556	144	688	179	171	882	224	889	187	202	169	178	739
323	214890	219481	168909	167146	145	724	170	185	863	198	862	171	215	134	152	735
324	214602	218961	169726	167144	135	778	191	197	861	186	872	206	198	120	206	756
325	215154	219309	169021	166864	135	755	181	202	846	204	870	194	223	130	179	731
326	214417	218968	169490	167483	141	767	162	197	893	201	885	187	191	142	178	791
327	214474	219514	169105	167221	135	780	185	177	923	199	881	215	189	144	169	659
328	214683	219268	169216	167066	133	772	164	187	881	211	892	181	221	124	162	747
329	214458	219323	169392	167093	126	749	171	184	866	218	879	200	202	137	184	735
330	214515	219775	169353	166618	141	733	201	183	949	219	838	179	219	153	194	732
331	214189	219680	169146	167264	128	730	199	183	899	203	830	163	169	133	203	735
332	213929	219869	169114	167365	132	753	181	181	848	202	802	208	183	122	170	712
333	214907	219085	169046	167235	119	737	187	199	864	194	882	175	186	140	163	714
334	215028	219767	168647	166719	137	760	184	186	834	207	876	189	198	149	187	735
335	214364	220063	169319	166431	145	696	191	202	888	196	834	205	200	126	170	722
336	214330	220008	168746	167116	134	753	170	170	860	192	908	164	202	122	162	705
337	213965	219913	169102	167149	139	784	192	199	868	227	880	191	211	142	187	694
338	214926	219075	169222	166754	130	704	174	189	890	226	876	191	188	142	168	707
339	214473	219657	168846	166944	134	788	168	175	854	174	878	194	207	127	186	737
340	214298	219134	169739	166750	128	675	168	190	849	186	902	165	204	150	183	738
341	214174	219988	169041	166619	136	710	164	181	891	216	860	197	200	143	184	693
342	214005	219700	169162	167068	131	775	195	190	879	184	851	183	190	125	177	713
343	214456	220093	168811	166610	135	735	185	186	903	197	885	180	203	122	169	749
344	214792	219447	168909	166768	138	727	189	197	918	208	871	173	197	121	189	751
345	215021	219405	168881	166604	121	773	176	199	890	183	845	182	193	123	184	708
346	214815	219786	168848	166453	134	758	184	183	910	215	846	172	205	137	185	681
347	214677	218867	169872	166447	110	794	206	205	889	211	859	180	216	150	173	734
348	215104	220013	168349	166360	123	781	170	198	901	183	849	182	161	128	149	775
349	213666	219809	169375	166915	148	715	178	160	842	196	865	202	182	129	197	711
350	214644	219534	168592	167040	125	716	181	198	891	188	861	179	208	120	189	728
351	214776	218730	168156	168086	123	759	185	189	930	241	862	218	202	141	182	696
352	214043	218739	168783	168104	126	740	173	168	866	188	874	201	186	138	164	730
353	214638	219264	169202	166659	149	731	186	186	893	222	820	205	208	137	169	697
354	214400	219688	168654	166892	126	744	178	203	865	182	897	200	208	127	185	706
355	214261	219570	169549	166297	145	778	189	191	864	208	845	173	199	149	182	730
356	215167	219350	168391	166744	136	742	195	185	874	199	944	191	200	126	183	763
357	214965	219520	167869	167270	118	753	171	188	894	211	916	185	199	125	179	670
358	214338	219468	168796	167034	135	758	148	179	853	228	840	159	197	112	182	737
359	214557	219334	168692	167098	149	744	180	184	858	198	832	184	222	132	163	772
360	214389	219006	168820	167401	155	696	199	180	902	184	869	178	184	155	166	736
361	214530	218939	168946	167209	131	760	162	200	891	180	890	198	177	110	173	739
362	215239	218664	168288	167376	119	693	164	178	858	203	867	181	207	134	175	709
363	214953	218568	168499	167368	135	727	195	190	896	191	940	182	219	146	178	768
364	215322	218235	168641	167183	134	729	182	172	901	196	912	189	232	115	185	758
365	214472	219180	168501	167272	135	755	207	165	918	183	899	195	196	122	165	698
366	214716	219145	168521	167017	127	713	176	179	836	194	864	185	195	131	179	696
367	214597	219051	168509	167225	131	715	148	181	873	233	856	189	217	152	175	718
368	215233	218385	168306	167398	146	710	178	181	876	190	850	204	180	128	185	740
369	214390	218260	169324	167392	139	738	172	183	838	230	881	192	198	123	169	749
370	213980	219119	168932	167231	105	730	175	178	837	181	905	179	218	130	174	670
371	215158	218008	168377	167668	135	755	197	187	890	219	863	201	197	121	184	728
372	214729	218089	168759	167685	143	713	188	205	932	202	901	175	188	133	161	705
373	215014	218303	169040	166768	134	727	167	181	910	191	850	169	224	143	176	794
374	215477	217415	168057	168180	147	759	177	221	901	181	885	178	215	123	179	722
375	215074	218268	168569	167201	141	725	197	191	893	207	826	201	231	106	159	736
376	214750	218779	168042	167592	105	773	167	192	859	198	878	162	205	131	164	745
377	214061	218087	168789	168176	143	775	199	189	860	196	882	170	220	142	154	735
378	214589	217936	168701	167893	132	726	189	175	885	201	882	206	201	138	174	689
379	214978	217692	168812	167741	130	716	166	192	892	183	903	169	177	132	171	706
380	214680	218478	168659	167297	137	726	180	180	873	182	865	198	194	107	201	702
381	214828	217032	169233	168013	111	701	183	193	879	166	913	195	174	136	176	721
382	214680	217591	169029	167709	132	731	188	188	978	185	880	198	204	121	174	769
383	214807	218184	168201	167654	145	783	174	182	844	175	928	165	230	126	176	713
384	214748	218190	168436	167480	149	756	206	224	864	203	910	202	204	110	170	733
385	214717	218371	168119	167586	119	723	184	208	921	194	899	168	203	136	174	736
386	214653	217647	168823	167616	152	747	203	174	880	194	870	181	195	149	191	754
387	214427	217475	168749	168077	129	725	199	172	861	223	900	202	182	128	168	743
388	214092	217900	168865	167857	129	746	167	155	883	191	903	182	198	133	186	730
389	214324	217596	169209	167584	133	806	171	196	875	186	872	175	199	125	170	754
390	214472	217264	169231	167765	144	759	186	187	881	197	917	195	191	126	162	778
391	215928	217096	168705	166940	141	767	189	196	874	208	845	169	182	134	178	679
392	214823	217214	168569	168086	114	698	183	197	854	189	881	197	181	143	157	710
393	214656	217153	169047	167774	150	757	177	201	897	206	911	188	215	130	181	731
394	215472	216804	169299	167092	130	736	168	207	916	196	844	192	213	145	188	757
395	214567	216817	169030	168226	138	750	178	189	871	177	933	198	193	138	181	743
396	214800	216710	169269	167855	132	777	197	196	874	186	863	216	203	143	174	731
397	215163	216548	169114	167650	118	772	164	192	920	208	816	197	174	132	170	738
398	214261	217456	168889	167785	128	761	181	208	869	168	842	201	197	139	182	768
399	214561	217070	168970	167817	164	723	189	200	924	186	886	162	177	146	185	722
400	214326	217133	169241	167746	140	705	204	209	870	206	906	173	213	128	196	723
401	215119	216654	168763	167921	133	721	169	191	872	200	853	208	194	131	163	719
402	214160	216476	169298	168519	130	762	172	181	913	197	938	191	231	138	153	773
403	215522	216435	168734	167716	124	704	186	186	860	205	885	188	215	124	158	720
404	214505	216971	168811	168042	131	714	172	164	921	189	909	185	208	131	173	782
405	214531	216691	168831	168201	146	745	178	177	915	214	872	152	183	111	180	790
406	214918	216393	169167	167761	119	719	182	178	903	184	869	189	201	135	161	737
407	214708	216556	169300	167656	135	780	186	180	833	203	835	198	208	142	169	732
408	215240	216272	169393	167353	140	760	174	198	915	211	874	185	201	140	182	765
409	214818	215957	169625	167791	143	728	181	194	851	177	869	189	205	107	163	744
410	214737	216342	168980	168139	142	743	193	167	896	217	843	191	192	143	206	730
411	214935	216736	168568	167900	132	754	182	197	828	191	873	191	198	133	179	716
412	215264	215966	168790	167962	124	677	191	178	891	193	872	193	211	115	166	736
413	215152	215902	169057	167913	134	733	176	223	906	187	849	198	215	122	168	741
414	214423	216286	169422	167831	149	757	166	201	924	214	849	192	190	143	174	745
415	214072	216580	169331	167966	123	759	180	207	879	200	854	187	209	115	201	756
416	214720	216302	168694	168256	134	748	177	178	904	216	911	198	194	136	182	790
417	214607	216114	168679	168508	128	788	169	205	827	200	891	191	173	128	183	795
418	215355	215659	168239	168613	143	723	160	211	830	183	858	180	233	129	170	745
419	214764	216219	168366	168533	144	747	187	172	891	194	900	182	193	113	202	748
420	214118	215835	169053	168850	140	713	164	185	941	172	828	185	199	177	193	709
421	214085	216897	169067	167745	147	758	177	187	872	226	872	186	195	125	183	739
422	214520	216331	168491	168545	118	782	160	201	853	206	924	174	194	120	190	699
423	214650	215971	169289	167956	131	719	178	176	925	176	926	165	198	126	185	698
424	214827	216391	168697	167860	144	760	174	190	902	214	863	202	183	143	164	748
425	214456	215821	168520	168882	153	750	172	222	834	197	884	210	217	131	191	752
426	215600	215794	168154	168019	145	709	176	203	899	211	919	181	199	148	201	774
427	214427	215466	168807	168961	150	740	178	195	828	186	911	190	198	130	151	736
428	215470	215741	168411	167999	131	724	171	198	924	183	906	196	214	135	194	693
429	214284	215272	168621	169380	121	716	178	165	853	160	862	173	215	155	163	713
430	214585	215569	168232	169167	138	714	177	187	860	217	850	170	220	139	170	703
431	214965	215382	168829	168353	121	757	195	186	884	169	880	195	210	144	164	779
432	214782	215619	168813	168269	146	745	200	201	856	189	893	200	194	145	177	727
433	214532	216080	168529	168375	131	750	183	199	831	202	875	164	185	137	192	699
434	214380	216053	168835	168194	140	719	195	185	883	185	888	191	198	165	165	732
435	214791	215632	168526	168404	128	720	165	184	917	196	887	180	205	124	200	743
436	214966	215779	167769	168763	117	738	157	222	908	201	872	194	189	118	189	718
437	214993	215203	168525	168635	110	786	170	201	842	199	829	190	205	147	185	723
438	215115	216057	168100	168107	146	708	156	200	865	193	872	202	223	137	175	763
439	214581	215117	169219	168464	134	752	181	193	919	184	885	197	177	129	188	760
440	215043	215591	168385	168224	125	697	172	200	897	206	888	182	223	117	185	725
441	214642	216341	168293	167996	113	754	188	169	856	219	903	172	177	125	190	724
442	214356	216102	168138	168683	155	744	192	184	916	213	884	178	217	128	194	811
443	214700	216040	168589	167964	155	727	171	195	923	202	945	186	185	144	179	717
444	215169	214898	168587	168665	125	699	155	162	912	176	899	169	188	168	180	742
445	215999	214782	168909	167537	135	743	180	185	955	198	896	199	185	128	188	739
446	214983	215884	168326	168091	143	724	180	203	906	189	904	217	188	130	171	719
447	215083	215295	168884	168079	115	699	193	190	891	201	867	208	207	144	184	760
448	215058	215004	168531	168763	135	761	201	161	868	198	873	166	174	128	166	758
449	214805	215544	168667	168243	135	760	177	171	883	174	911	187	188	141	176	764
450	214515	216144	168642	168003	144	719	157	175	867	195	857	155	196	141	171	704
451	215516	214418	168761	168535	138	781	153	182	889	200	878	170	186	129	162	766
452	214846	215674	168193	168479	127	702	187	179	905	193	954	193	177	121	173	753
453	215688	214981	167863	168700	138	681	178	180	861	191	892	186	175	134	163	778
454	215192	216022	167723	168350	137	709	187	177	863	218	873	168	178	124	183	723
455	215005	215250	167818	169131	121	705	181	207	825	210	790	192	199	116	195	743
456	215274	214738	168805	168346	139	773	183	167	868	182	886	181	196	120	178	788
457	215486	215751	167597	168418	119	762	174	184	861	212	884	174	185	121	180	717
458	214666	215502	168533	168361	120	748	180	165	948	177	845	194	228	113	145	768
459	215292	215413	168253	168086	128	770	176	180	859	166	848	211	195	168	210	750
460	215996	215028	167718	168257	131	730	183	178	845	194	930	211	215	126	162	782
461	215538	215780	167616	168114	142	736	196	186	885	200	852	190	189	120	191	793
462	215630	214780	168182	168549	138	754	187	166	862	201	897	170	176	121	187	726
463	215586	215033	168147	168394	153	767	181	193	878	201	891	158	183	117	177	728
464	216170	214746	167795	168390	133	727	187	190	844	201	834	185	219	130	170	780
465	215161	215077	168393	168577	129	750	179	152	906	182	905	212	238	123	196	784
466	215114	215288	168319	168345	132	765	180	175	860	193	873	175	184	144	169	729
467	215578	215678	167903	167902	138	832	165	177	873	188	887	194	201	128	211	762
468	215481	215392	167833	168275	124	716	177	183	868	194	871	208	201	123	172	739
469	216158	214762	167717	168302	155	798	222	205	866	197	857	189	187	139	179	781
470	215696	215838	166966	168495	130	759	182	164	889	171	926	179	190	138	183	746
471	215672	214685	168350	168323	133	754	171	194	878	206	879	190	187	137	186	763
472	216073	214867	168028	168161	149	714	187	186	878	208	899	212	214	146	154	742
473	215840	215468	167319	168520	112	747	160	177	870	194	887	204	208	127	185	761
474	215238	215448	167978	168360	128	775	175	192	910	192	855	193	213	118	159	771
475	215563	215524	167646	168332	141	760	189	183	891	204	870	188	193	138	172	795
476	215766	215101	167812	168394	136	765	188	208	860	195	916	184	184	150	164	751
477	216579	215161	168001	167356	118	787	187	184	861	183	879	159	229	142	163	754
478	216329	215441	167388	167929	147	778	176	202	914	208	901	199	213	142	160	791
479	216736	214422	167536	168414	126	715	178	190	854	194	904	177	195	118	176	751
480	216258	215462	167354	167963	102	755	189	193	890	230	853	189	200	146	175	778
481	214991	215538	168128	168288	114	776	200	185	890	195	890	199	185	153	197	731
482	216252	215452	167814	167460	147	780	187	200	880	179	964	163	188	151	189	766
483	216005	215789	167997	167165	140	742	183	212	835	193	828	183	187	137	193	789
484	215968	215642	167714	167607	139	737	172	194	836	169	849	184	189	144	189	730
485	216087	215226	167920	167771	136	743	168	179	880	212	884	197	186	136	166	747
486	216073	215765	167382	167709	121	739	167	165	887	208	888	147	187	147	151	714
487	215838	215853	167526	167793	136	713	186	190	893	203	851	185	180	130	203	774
488	215762	215674	167620	168010	157	731	180	163	846	173	901	187	184	121	165	752
489	215920	216102	168303	166756	147	798	160	191	901	215	867	195	195	138	188	743
490	216125	215496	167938	167503	128	749	180	161	852	198	938	220	210	146	193	776
491	215977	215856	167670	167542	132	773	182	213	857	180	893	202	184	123	184	800
492	215950	215645	168412	167085	143	791	193	194	856	185	909	182	203	141	188	754
493	216270	216259	167672	166804	141	771	201	198	898	201	874	190	187	113	162	756
494	215285	216286	168246	167168	148	745	179	165	884	198	873	205	204	129	171	812
495	216514	215910	167881	166627	143	753	176	181	912	184	885	211	197	136	192	736
496	216310	216027	167902	166669	147	725	179	179	906	218	849	185	206	130	199	809
497	216243	215654	167724	167298	138	758	204	178	936	202	873	205	167	135	175	786
498	216193	216757	167233	166765	132	715	183	202	874	157	911	195	199	138	190	769
499	215441	216138	168006	167248	122	765	187	192	847	203	890	195	180	116	162	730
500	216121	216038	168289	166382	142	786	161	187	917	192	879	176	181	126	182	752

## Sheet: Barski Intraspecies
	Ancestral base count				Base change count (ancestral->current)
Position	A	T	C	G	T->A	T->C	T->G	C->A	C->T	C->G	G->A	G->T	G->C	A->T	A->C	A->G
-500	106655	106777	97675	98657	36	189	58	63	291	71	305	70	74	38	45	162
-499	106962	106380	97832	98605	54	210	61	75	287	68	278	72	68	38	52	186
-498	106350	106820	97994	98807	54	218	59	69	260	69	273	62	73	50	61	191
-497	106480	106550	98197	98787	34	197	53	49	288	61	286	60	66	32	54	165
-496	106641	106491	98015	98623	44	175	53	76	292	78	306	62	84	41	57	170
-495	106419	106044	98891	98592	43	178	56	66	268	60	306	80	65	41	46	198
-494	106594	106788	97902	98528	49	178	58	51	298	70	281	80	63	53	44	156
-493	106345	106117	97975	99395	54	173	48	60	296	88	287	71	82	43	59	168
-492	106113	106305	98496	98935	54	186	50	46	293	70	324	73	69	41	54	168
-491	106572	106858	97906	98488	39	198	47	70	281	80	299	67	68	34	57	197
-490	106700	105970	98134	99013	49	163	52	57	305	80	298	83	87	50	46	161
-489	106593	106240	98283	98714	36	185	64	74	284	74	311	63	56	42	64	186
-488	106596	106191	98234	98859	29	204	55	71	298	63	301	60	79	42	54	181
-487	106727	106285	98001	98930	52	203	46	72	308	63	314	70	78	52	56	180
-486	106338	105949	98163	99362	38	166	56	72	295	71	318	74	73	41	49	187
-485	106143	106151	98310	99326	45	192	51	65	285	82	268	66	62	40	43	174
-484	106145	105707	98746	99399	47	176	51	67	243	71	302	65	72	45	52	182
-483	106298	106116	98615	98869	43	203	57	81	298	71	329	74	81	30	59	203
-482	106270	105932	98600	99059	34	184	56	65	277	69	283	55	73	49	62	193
-481	106460	106287	98309	98892	31	150	61	66	272	78	283	62	80	49	48	174
-480	106080	105815	98517	99424	28	169	45	83	294	86	286	69	75	43	58	163
-479	105842	106107	99105	98777	56	191	43	70	274	68	287	82	71	26	53	191
-478	106161	106248	98626	98875	35	153	62	69	258	63	282	57	74	38	56	181
-477	106093	105977	98471	99256	38	168	57	57	286	57	282	76	71	24	52	179
-476	105952	106639	98419	98944	47	199	52	78	314	66	299	72	81	43	63	182
-475	106358	105851	98590	99155	46	190	60	59	320	65	316	56	82	49	48	182
-474	106201	105568	99036	99086	57	171	54	67	316	60	310	67	67	32	56	191
-473	105999	105991	98949	98942	48	203	58	66	312	63	297	68	75	43	67	181
-472	105810	106399	99123	98548	45	195	46	64	280	80	288	63	76	45	54	162
-471	105863	106024	98938	99022	44	171	49	63	318	82	295	86	79	45	51	184
-470	106333	105757	98902	98737	34	181	42	64	279	79	289	73	90	41	58	197
-469	106043	105602	98876	99391	37	171	59	78	302	71	297	63	68	29	54	192
-468	105813	105916	99036	98979	36	178	70	67	299	66	252	82	78	56	54	169
-467	105949	105999	98691	99046	43	178	59	70	289	71	295	84	77	37	51	186
-466	106050	106085	98972	98806	50	166	52	59	295	79	277	70	69	42	55	177
-465	106287	105480	99165	98844	50	190	59	65	270	63	296	65	74	44	66	180
-464	105552	106049	98971	99228	35	139	47	72	271	76	267	70	67	42	55	170
-463	106251	106117	98912	98537	48	187	61	63	298	73	281	66	81	37	54	202
-462	105843	105760	99575	98691	36	198	41	71	271	79	299	81	73	36	63	202
-461	106074	106097	98837	98802	44	174	39	64	303	78	291	61	69	56	59	163
-460	105182	106374	99417	98905	62	186	57	76	282	84	260	55	93	47	49	173
-459	106302	105287	99639	98678	49	198	56	57	285	77	285	72	73	46	48	165
-458	105401	105921	99017	99378	47	178	71	67	294	68	287	66	77	40	57	140
-457	106151	105320	99242	99170	63	193	46	72	295	68	292	66	75	48	48	184
-456	105580	106243	99027	99167	41	180	49	71	300	76	279	68	75	40	54	182
-455	106027	106229	98787	98744	64	192	56	65	276	58	271	55	69	55	56	195
-454	105713	105793	99154	99196	49	174	34	83	319	71	327	43	83	42	68	167
-453	105518	105722	99425	99173	42	191	65	57	284	80	301	96	87	37	42	158
-452	105515	106307	98906	99118	47	176	44	61	311	87	287	63	70	47	60	180
-451	105772	105886	98895	99231	45	184	51	79	285	66	293	78	76	47	56	182
-450	105266	106069	99394	99191	46	160	55	71	292	80	301	65	78	39	60	176
-449	105423	105807	99747	98956	46	185	52	71	285	70	280	77	71	52	40	165
-448	105807	106019	99142	98897	42	179	44	75	291	57	304	67	88	51	61	173
-447	105348	106097	99300	99112	37	190	52	79	277	68	305	64	72	46	53	182
-446	105993	105699	99013	99244	47	161	62	65	299	75	283	72	83	38	49	177
-445	105945	105975	99051	98909	31	198	52	75	316	59	306	73	64	46	57	161
-444	105382	106095	99069	99496	50	175	47	62	300	81	316	74	80	34	64	171
-443	105565	105501	99104	99823	44	174	47	76	282	71	290	74	76	42	59	185
-442	106156	105886	98832	99115	43	182	54	60	294	77	296	59	76	45	51	166
-441	105788	105592	99254	99261	43	179	45	62	276	77	291	97	74	43	55	188
-440	105888	105923	98930	99032	36	188	52	65	321	84	333	67	70	57	54	176
-439	105481	106073	99278	99074	65	178	68	70	325	78	306	69	75	35	50	171
-438	106061	105519	98896	99413	46	169	61	75	309	63	301	50	74	49	55	196
-437	105897	105453	99522	99103	47	185	58	64	310	76	339	74	68	37	47	181
-436	105909	105854	99238	99075	42	193	56	73	294	75	300	69	84	43	55	162
-435	106150	105124	99253	99353	53	175	52	68	256	77	278	62	80	47	53	188
-434	105519	105111	99580	99690	47	180	58	48	275	72	289	64	74	45	59	164
-433	105702	105674	99462	99028	35	203	61	73	289	76	284	55	62	52	56	187
-432	106013	105608	99041	99157	43	189	51	66	283	71	293	67	70	43	55	183
-431	105911	105696	99400	99027	35	194	51	80	290	69	332	67	66	43	73	159
-430	105965	105364	99301	99192	53	172	50	68	292	68	270	81	82	39	57	191
-429	105568	105327	99711	99328	45	187	50	71	308	70	300	64	59	35	50	151
-428	105729	105616	99671	98887	47	170	54	69	331	76	294	58	72	36	47	176
-427	105595	105554	99330	99420	45	178	57	81	301	60	298	67	78	47	49	202
-426	105912	105852	98960	99277	37	189	57	54	268	66	301	54	80	39	44	178
-425	105452	105262	99537	99714	40	211	61	62	275	82	288	65	75	53	60	184
-424	105857	105583	99262	99182	47	169	43	70	276	81	302	75	61	48	49	177
-423	105851	105684	99101	99438	38	195	49	65	297	78	307	53	85	52	43	179
-422	105839	105904	99206	98920	51	194	52	60	323	65	287	52	78	39	44	172
-421	105776	105424	99691	99193	42	190	53	71	291	68	290	65	81	44	48	171
-420	105339	105516	100090	99036	41	175	59	74	290	73	310	74	77	46	57	156
-419	105900	106037	98835	99153	35	196	40	70	281	75	277	66	86	36	42	173
-418	106159	105514	99183	99125	49	186	42	78	287	79	278	73	65	42	53	201
-417	105825	105196	99410	99507	44	190	49	76	309	60	297	75	58	40	68	188
-416	105593	105552	99562	99267	39	171	44	92	286	69	319	78	70	27	51	187
-415	105754	105744	99542	98984	51	169	58	72	293	65	304	65	75	48	61	198
-414	105477	105673	99341	99409	37	174	51	67	304	71	310	83	67	43	49	184
-413	106065	105686	99343	98889	50	178	47	67	304	72	283	71	78	54	60	159
-412	106260	105619	99152	98875	46	167	57	88	330	82	274	73	79	32	41	198
-411	106128	106027	98575	99262	36	178	62	57	320	84	254	69	84	38	47	176
-410	105922	105260	98860	99977	38	164	46	76	303	63	280	64	73	56	49	170
-409	106453	104990	99733	98939	44	183	51	67	333	70	291	60	70	39	52	186
-408	106594	105775	99017	98601	43	187	46	65	306	67	299	87	78	37	58	213
-407	106001	105565	98723	99656	44	189	56	62	277	79	292	81	84	40	52	175
-406	105265	105211	99119	100122	40	181	62	69	303	71	331	63	63	31	51	173
-405	105966	105673	99479	98829	44	170	63	80	306	67	295	63	80	44	70	167
-404	105511	105522	99544	99415	45	167	56	64	266	66	309	77	63	51	42	184
-403	105724	105591	99648	98988	46	163	46	78	296	74	298	67	65	51	58	191
-402	105956	105325	99455	99183	52	155	51	70	282	68	306	70	73	37	48	205
-401	106130	105615	98980	99369	46	181	58	56	286	78	298	76	63	35	50	159
-400	105858	105491	99169	99482	40	198	56	68	290	77	300	62	65	36	61	175
-399	106165	105038	99402	99547	44	180	54	67	322	73	294	60	55	47	41	169
-398	105776	106023	99187	98934	52	177	67	58	288	51	321	72	62	48	47	189
-397	105276	105783	99262	99837	46	176	62	82	269	70	289	61	72	40	45	156
-396	105967	105500	99068	99512	45	187	58	64	278	65	300	65	83	45	61	166
-395	105737	105791	99248	99329	45	191	57	83	296	81	301	68	71	58	57	181
-394	106057	105545	99111	99397	38	186	50	73	290	80	296	74	69	39	60	180
-393	106116	105543	99343	99141	43	181	51	67	274	85	300	53	71	42	54	182
-392	106701	105771	98577	99022	44	178	58	69	283	63	266	49	74	31	41	198
-391	106320	105636	99105	99207	42	163	46	79	301	80	288	60	83	46	51	174
-390	105741	105807	99284	99261	43	154	55	67	310	77	273	59	62	53	56	175
-389	106178	105577	98767	99632	46	192	47	60	282	76	277	55	71	55	47	185
-388	106190	105178	99605	99230	48	171	48	64	272	85	282	75	73	35	42	191
-387	105866	105627	98975	99789	38	182	63	75	319	51	294	74	75	40	55	199
-386	106223	105409	98635	99800	36	198	53	65	318	79	282	74	82	47	56	168
-385	106019	105403	99381	99539	31	210	55	68	305	72	303	53	73	51	56	166
-384	106357	105441	99011	99464	44	164	42	58	289	86	281	71	61	47	58	165
-383	106108	105817	99108	99284	32	174	48	68	281	67	288	55	79	43	51	190
-382	106575	105320	99384	98975	39	177	55	76	293	51	309	66	66	44	52	188
-381	106877	105156	98982	99175	44	191	50	68	292	64	288	53	76	45	59	172
-380	106390	105278	99066	99528	37	170	43	72	303	67	304	69	60	44	50	178
-379	106476	104797	99504	99556	35	152	50	77	281	69	315	75	67	37	48	178
-378	106322	105364	99102	99390	37	179	47	66	266	64	285	71	76	33	52	183
-377	106079	105525	98941	99618	41	207	45	61	296	77	304	67	84	41	56	160
-376	105360	105468	99613	99729	49	192	60	87	313	89	317	75	76	37	60	179
-375	106091	105454	98960	99817	40	179	59	71	303	88	312	59	72	45	43	167
-374	105969	105711	99094	99568	51	176	60	69	301	68	282	68	65	44	48	193
-373	106430	105149	99508	99190	37	183	48	58	303	71	325	80	62	42	60	172
-372	106386	105536	99399	98996	47	186	54	64	289	78	295	66	68	44	51	195
-371	106231	105937	98833	99410	49	175	56	69	296	86	307	81	63	42	48	166
-370	105945	105801	99051	99481	39	183	48	72	291	72	294	64	62	56	65	142
-369	106156	104878	99616	99678	39	174	52	56	285	69	296	58	70	41	53	151
-368	106397	105377	98977	99644	28	157	35	74	320	73	307	69	73	53	60	164
-367	106479	105330	98997	99607	51	161	53	70	302	68	289	63	80	42	52	189
-366	106555	105020	99456	99461	48	184	55	61	300	71	303	62	79	42	47	176
-365	106612	105233	99178	99237	44	171	46	61	297	73	307	82	90	37	54	186
-364	106133	105435	99118	99684	45	208	55	71	297	60	285	73	73	40	57	161
-363	106281	105628	98976	99509	50	174	46	81	276	71	282	70	70	64	50	194
-362	106450	105216	99558	99244	44	196	46	76	318	52	291	81	70	44	55	202
-361	106920	105543	98540	99510	43	175	65	80	302	67	329	67	67	48	45	170
-360	106475	105395	98787	99692	38	190	53	79	262	82	299	65	51	53	46	171
-359	106630	105026	98659	100080	37	183	50	70	264	65	328	75	66	42	55	173
-358	106303	105302	99391	99410	46	193	44	74	302	61	310	79	90	43	46	176
-357	106716	104965	99272	99550	39	164	63	58	280	78	332	69	73	44	60	192
-356	106495	104821	99242	99872	41	146	38	69	293	64	257	62	74	45	50	162
-355	106844	105279	98900	99423	39	197	53	69	284	74	282	56	74	38	47	182
-354	105885	105465	99551	99569	44	160	70	72	296	80	299	62	77	51	57	147
-353	106878	105012	99150	99527	40	178	55	59	315	72	294	59	71	57	50	174
-352	106697	105229	99062	99548	43	178	67	61	303	69	295	67	66	31	46	182
-351	106155	105337	99291	99743	34	173	45	69	284	70	299	77	80	49	52	194
-350	106270	105243	99142	99859	45	178	58	71	274	63	318	62	72	43	57	172
-349	106806	105363	99064	99315	45	173	43	57	266	77	309	60	55	51	62	169
-348	106632	105009	99329	99681	44	168	46	69	290	94	287	75	73	46	61	164
-347	106025	105601	99294	99606	44	181	58	73	300	77	312	77	70	45	52	189
-346	106713	105105	99265	99438	44	166	50	69	343	77	277	62	65	46	54	186
-345	106912	105134	99188	99315	43	184	51	76	286	71	297	58	73	38	59	181
-344	106522	104879	99102	99955	48	172	59	63	299	69	254	73	70	43	49	180
-343	106143	105641	99148	99613	36	169	50	70	302	77	292	68	76	44	53	162
-342	106286	105358	99647	99290	42	176	57	71	307	65	318	77	61	42	46	178
-341	106598	105418	99224	99265	44	188	55	78	281	80	296	76	87	40	51	182
-340	106472	105573	98640	99944	50	165	54	70	255	75	276	65	100	53	39	171
-339	106511	105129	99822	99203	44	184	50	59	271	61	266	72	63	45	53	189
-338	106487	105595	99118	99340	34	184	53	74	282	71	295	56	74	45	55	174
-337	106712	104976	99391	99524	34	177	32	57	285	73	297	74	81	36	57	198
-336	106812	105267	99185	99294	44	179	50	53	273	74	275	74	81	44	49	214
-335	106630	104953	99728	99231	41	194	57	80	293	60	265	63	67	47	54	168
-334	106814	105017	99084	99668	41	195	44	69	284	63	301	54	83	48	48	176
-333	106552	104742	99250	100102	38	173	37	70	298	76	308	65	71	41	46	173
-332	106435	105041	99115	100038	38	168	51	61	287	77	272	70	71	40	51	140
-331	106065	105210	99358	100067	42	179	59	88	289	80	320	63	77	41	49	166
-330	106625	104999	99280	99692	38	165	48	56	301	83	294	73	69	41	63	206
-329	106462	105170	99285	99731	42	163	45	75	295	83	286	75	70	57	55	166
-328	106035	105092	99437	99963	43	171	51	62	283	67	312	79	72	47	46	170
-327	106785	105181	99280	99306	39	172	49	62	261	52	282	65	78	38	45	181
-326	105941	104933	99971	99728	36	204	47	72	285	59	278	50	80	40	46	194
-325	106359	105465	99465	99291	42	176	46	70	308	78	278	73	63	41	43	177
-324	106363	105263	99039	99923	37	180	54	76	317	62	307	63	77	55	46	168
-323	106505	104850	99467	99738	46	180	55	71	277	67	302	63	71	40	60	165
-322	106385	105008	99590	99632	46	215	49	62	299	74	269	67	71	44	52	193
-321	106244	105307	99347	99706	40	190	58	68	278	77	307	74	72	44	49	179
-320	106814	104585	99448	99829	54	161	48	64	289	74	294	66	84	40	47	157
-319	106365	105137	99181	99910	42	176	54	69	258	80	303	64	69	22	58	187
-318	106497	105035	99817	99305	33	183	54	70	294	64	261	83	70	53	56	162
-317	106359	105605	99307	99350	43	172	39	64	281	82	289	60	69	34	57	161
-316	106617	105595	99025	99479	45	173	57	63	314	90	287	66	80	50	51	181
-315	106547	104505	99285	100131	46	190	60	71	287	74	316	60	103	46	39	198
-314	105717	105267	99449	100271	46	172	54	51	302	73	291	66	65	36	52	190
-313	106095	105156	99904	99533	46	204	56	65	302	89	295	74	73	39	52	182
-312	106294	104811	99396	100113	42	203	59	51	302	64	328	80	68	44	51	191
-311	106523	104534	99785	99749	38	161	60	63	277	81	329	82	85	43	60	156
-310	106468	105354	99351	99505	34	177	47	66	291	82	288	58	86	43	77	185
-309	106381	105024	99750	99494	41	180	47	72	271	65	306	69	70	34	65	218
-308	106597	104403	99867	99790	35	188	55	75	271	64	328	68	73	53	60	185
-307	106298	105106	99388	99925	33	193	49	67	303	69	301	84	65	51	66	169
-306	106071	105263	99086	100311	35	200	47	66	287	76	326	84	70	48	64	147
-305	105981	105154	99887	99751	41	160	49	62	290	66	289	68	65	55	45	186
-304	106054	105823	98719	100112	51	158	45	63	284	67	284	75	75	33	44	187
-303	105903	104743	100010	100027	48	178	47	67	293	62	291	68	60	40	53	147
-302	106220	104873	99719	100012	40	191	49	67	313	69	288	66	79	45	40	171
-301	106494	105058	99514	99524	39	177	59	70	262	69	293	57	78	39	45	180
-300	106008	105193	99828	99675	40	181	53	65	321	70	266	68	73	35	51	189
-299	106368	105036	99733	99577	31	167	45	71	305	72	268	67	68	52	47	184
-298	105785	105109	99994	99715	34	167	55	66	280	57	287	65	77	41	49	155
-297	105883	105097	99714	99992	53	185	66	70	295	77	300	66	79	39	48	177
-296	106311	105059	99764	99574	37	161	61	71	299	63	277	67	86	33	55	184
-295	106115	105260	100059	99318	35	186	64	63	274	87	277	71	78	35	55	161
-294	105983	104565	100255	99887	46	161	44	68	315	80	318	59	86	51	46	188
-293	106245	105264	99244	100004	50	168	59	72	284	47	276	68	68	42	52	178
-292	105734	104929	100158	99915	33	216	50	64	281	70	284	76	65	38	50	190
-291	105895	105820	99364	99642	43	172	38	87	285	72	295	69	77	49	52	182
-290	105898	105293	99646	99848	38	184	42	69	301	81	298	74	92	48	53	164
-289	106259	104747	99721	99930	41	169	47	80	317	86	270	67	73	47	47	172
-288	105751	105036	100423	99529	41	178	56	76	289	70	298	57	70	50	48	184
-287	106098	104982	99932	99730	39	190	40	67	309	76	304	74	77	48	52	168
-286	105905	105419	99477	99902	41	170	52	54	292	73	291	74	69	44	61	206
-285	105743	104996	100270	99654	39	161	51	74	294	87	300	72	93	37	58	193
-284	105441	104954	99913	100342	42	186	48	71	284	77	294	79	76	37	48	172
-283	105622	105281	99852	99921	38	189	52	55	289	71	291	75	90	48	59	180
-282	105761	105062	100095	99766	50	207	36	61	308	92	289	75	84	39	60	179
-281	106109	105415	99583	99615	42	184	50	60	286	71	317	64	75	45	42	184
-280	106248	104405	99927	100035	47	164	51	66	272	75	295	64	78	51	43	164
-279	105838	105197	99666	100014	52	178	41	71	279	71	304	64	85	44	47	171
-278	106190	104860	99555	100068	33	179	55	70	307	78	262	59	55	41	53	171
-277	105616	105250	99604	100256	36	188	57	63	274	69	307	78	63	46	53	175
-276	105789	104773	99998	100013	48	174	50	79	315	78	301	64	61	35	59	171
-275	105899	104966	99846	99929	39	182	53	72	299	68	292	67	70	56	57	193
-274	106326	104257	99609	100504	34	198	65	59	261	65	334	84	75	39	47	185
-273	105573	104950	100059	100254	42	173	58	68	273	65	279	63	81	45	62	209
-272	105770	104823	100040	100157	47	178	43	54	289	82	279	65	55	43	56	173
-271	105684	104985	99534	100407	32	199	48	66	287	86	280	64	78	44	45	167
-270	105500	105219	99992	99888	40	162	57	69	311	80	284	63	65	53	49	184
-269	106227	104887	99790	99801	38	194	63	72	318	72	311	65	82	39	45	167
-268	106118	104652	99891	100038	33	186	59	77	287	63	305	69	81	48	50	185
-267	105939	104348	99869	100479	44	164	51	75	282	73	299	75	74	30	54	195
-266	105897	104674	99644	100500	38	182	63	61	262	70	294	78	77	38	50	193
-265	106013	104878	99287	100528	42	203	61	60	279	74	314	61	85	42	52	179
-264	105628	105092	99562	100406	40	167	58	71	290	80	304	72	76	40	58	158
-263	105626	104825	100358	99946	43	189	57	60	325	67	266	55	74	37	65	191
-262	105641	104869	100513	99727	43	172	51	55	299	76	283	85	87	41	63	175
-261	105304	104592	100498	100403	42	179	47	77	279	73	300	67	77	44	56	160
-260	106014	104822	99998	100015	52	166	53	72	288	85	312	67	65	36	45	200
-259	105549	104746	99752	100687	43	189	39	89	278	93	273	88	83	49	57	191
-258	105350	104831	100257	100282	43	173	53	72	268	79	311	64	83	35	49	167
-257	105655	104742	99894	100451	41	187	45	61	275	76	289	58	74	31	54	181
-256	105431	104767	99683	100884	55	189	56	77	287	66	311	63	78	40	62	177
-255	105449	105247	99871	100050	50	192	49	68	271	75	275	58	73	35	51	209
-254	105878	105511	99381	99979	38	175	52	64	292	82	288	67	77	38	59	178
-253	105222	104743	100027	100658	49	185	60	63	312	74	261	60	78	38	66	188
-252	105620	104930	99473	100723	38	187	59	77	277	86	294	52	69	44	52	189
-251	105610	104580	100341	100173	48	189	56	75	290	86	301	51	84	30	47	172
-250	106088	104706	99403	100500	41	177	49	54	298	66	284	75	80	50	52	168
-249	105847	104726	99229	100930	52	187	47	70	351	71	309	99	65	41	60	170
-248	106149	104004	99551	100954	36	168	46	71	289	86	311	60	93	42	62	202
-247	105929	104408	100030	100405	44	168	53	79	305	65	295	75	75	42	62	164
-246	105804	104462	99593	100880	41	177	49	59	266	89	280	57	91	35	57	183
-245	105265	104745	100251	100444	46	188	50	71	276	62	301	70	78	46	42	183
-244	105661	105067	99514	100505	35	156	51	68	313	72	301	68	73	43	52	191
-243	105467	104683	99979	100562	34	163	53	72	313	75	306	69	65	42	47	176
-242	105596	104528	99873	100745	39	197	38	61	302	72	274	80	84	45	52	196
-241	106140	104361	99728	100456	36	178	57	85	279	79	317	62	74	34	57	150
-240	105999	104349	99818	100551	59	182	55	85	301	70	335	74	78	43	51	177
-239	105654	104817	99268	101146	47	187	65	85	289	73	282	78	72	35	45	176
-238	105467	104818	99784	100626	55	191	47	85	304	77	281	76	72	47	46	187
-237	105422	104422	99544	101202	39	179	54	63	290	74	299	68	87	45	54	196
-236	105815	104305	99426	101225	50	176	42	77	284	66	299	69	88	43	52	181
-235	106555	104469	99196	100554	51	190	64	70	288	71	314	61	93	33	65	165
-234	105192	104586	99840	101119	42	207	54	62	279	53	322	73	92	36	55	163
-233	105746	104351	99877	100874	42	172	44	63	301	72	288	61	82	34	56	162
-232	105471	104699	99120	101514	53	191	60	67	297	73	325	58	75	29	45	187
-231	105691	104813	99616	100716	31	174	46	70	280	78	298	90	71	36	52	190
-230	105828	104338	99640	101196	32	182	46	60	306	78	268	66	82	35	53	169
-229	105369	104938	99850	100770	41	175	50	72	252	72	312	60	74	39	52	170
-228	105561	104616	99747	101001	43	172	41	58	307	73	280	72	70	39	60	156
-227	105071	104660	100120	100960	55	186	49	54	277	76	289	77	76	43	55	167
-226	105753	104368	99859	100881	42	182	43	53	285	77	301	78	92	38	40	186
-225	105703	104804	99689	100809	49	183	58	53	295	83	285	64	71	44	52	167
-224	104987	104568	99571	101885	50	188	47	71	283	69	293	75	72	52	49	199
-223	105233	104458	100430	100839	37	181	58	81	306	66	294	63	80	46	44	160
-222	105524	104585	100236	100737	39	165	47	82	276	66	266	55	75	52	54	194
-221	105844	104224	100171	100738	47	178	56	70	269	69	302	65	83	53	56	161
-220	105398	104343	99608	101596	43	186	60	69	285	86	285	63	61	42	49	172
-219	105226	104292	100508	100995	48	158	51	74	272	61	322	65	84	40	52	181
-218	106043	104787	99336	100757	47	181	52	63	290	86	272	64	72	52	41	193
-217	105412	104435	100078	101159	47	181	35	59	287	82	291	55	66	44	58	193
-216	105442	104208	100006	101360	43	147	63	75	315	75	296	67	78	49	53	183
-215	105882	104619	99472	100986	38	189	49	58	303	71	295	71	79	39	52	172
-214	105510	104209	99953	101558	32	191	56	60	310	77	315	76	77	54	62	191
-213	105794	104703	99524	101057	43	207	56	82	302	86	297	70	62	49	41	182
-212	105278	104375	100114	101389	35	194	45	59	283	68	312	68	78	32	51	203
-211	105547	104521	100396	100639	53	154	54	67	286	70	311	67	73	54	52	166
-210	105425	103906	100653	101101	34	191	58	69	281	82	270	56	65	58	54	187
-209	105483	104554	99973	101178	50	177	55	70	282	81	293	82	87	46	46	173
-208	105834	103884	100802	100566	51	152	44	63	292	72	285	76	69	40	55	173
-207	105301	104830	99793	101175	41	172	55	68	266	74	307	86	71	40	35	165
-206	105537	104255	99886	101318	39	167	48	65	276	72	281	73	77	43	48	184
-205	105284	104694	100007	101102	52	184	47	88	297	86	297	79	83	46	54	192
-204	105366	104729	100292	100719	42	174	48	63	278	74	306	75	67	41	63	173
-203	105053	104869	100513	100693	29	194	47	77	293	100	281	58	69	47	61	173
-202	105236	104918	100183	100784	33	178	44	63	305	70	267	69	78	50	57	180
-201	105904	104579	100367	100329	40	178	61	61	264	67	264	53	78	35	58	183
-200	105092	105025	100138	100834	35	180	46	75	274	91	312	67	63	47	54	163
-199	105298	104735	100349	100788	43	182	56	61	272	81	285	85	64	33	46	170
-198	105606	104737	100562	100243	47	177	51	59	315	73	281	80	69	35	51	179
-197	105332	104752	100124	100921	35	158	52	67	294	73	294	74	78	42	59	198
-196	105337	104745	99968	101144	60	177	54	55	269	78	288	75	79	48	41	204
-195	105518	104498	100537	100539	38	165	41	59	307	63	330	67	77	40	57	185
-194	105952	104412	100618	100247	26	174	48	74	284	74	298	57	57	42	61	177
-193	105473	104927	100311	100372	50	174	38	65	302	75	262	61	83	40	56	172
-192	105535	105049	100354	100146	38	184	59	69	267	68	311	71	67	30	71	180
-191	105156	104983	100596	100541	41	179	52	73	298	81	328	66	74	39	49	169
-190	105509	105119	100005	100548	42	181	61	61	254	70	286	70	78	32	42	178
-189	105419	104615	100542	100506	45	177	56	67	284	68	317	69	61	46	51	165
-188	105519	105243	100716	99637	33	181	42	66	289	71	293	62	75	38	55	176
-187	105426	105097	100652	100050	34	185	66	71	275	78	262	73	86	48	57	179
-186	105502	105451	99939	100292	38	178	61	67	274	77	263	74	71	35	60	184
-185	105513	104837	100397	100444	40	195	48	74	292	57	310	75	68	41	63	167
-184	105865	105171	99753	100343	39	185	48	79	271	67	303	59	66	49	45	162
-183	105070	104836	100570	100611	46	201	54	63	300	77	295	67	58	40	45	184
-182	105622	105300	100613	99676	38	184	42	84	310	80	311	53	79	40	60	205
-181	106140	105001	100489	99510	26	163	45	70	271	82	277	61	71	35	64	177
-180	105759	105472	100373	99582	43	169	59	85	266	61	295	72	87	36	51	163
-179	105717	105394	100266	99834	43	189	46	77	306	68	304	77	72	34	65	169
-178	105652	105657	100209	99649	43	151	52	54	297	83	291	71	72	41	64	165
-177	105573	105269	100478	99890	49	194	47	57	276	71	303	86	79	42	58	171
-176	106048	105462	100140	99434	40	167	52	80	276	77	322	69	61	48	54	194
-175	105675	105518	100514	99468	37	179	56	65	312	81	298	67	77	41	55	161
-174	106095	105580	100553	99098	36	177	48	71	275	84	286	63	81	54	51	166
-173	105854	105895	100219	99187	46	181	57	76	292	85	287	66	64	46	68	163
-172	105894	105193	100957	99131	37	178	50	69	271	67	300	67	63	36	49	174
-171	106012	105916	100575	98793	36	183	49	67	298	76	265	68	71	45	47	169
-170	105427	105621	100745	99458	50	165	49	80	312	85	291	74	85	47	53	200
-169	105492	105661	100933	99128	28	180	53	73	269	72	285	69	71	49	47	162
-168	105804	105852	100775	98931	32	189	57	58	307	70	293	69	66	42	50	192
-167	106201	105658	100204	99213	40	191	51	66	295	73	268	61	67	39	67	175
-166	105735	105974	100034	99572	52	159	41	75	280	91	326	72	68	35	64	182
-165	106051	106425	99969	98763	39	217	55	58	274	65	268	64	81	45	42	161
-164	106007	106291	99899	99047	36	173	47	58	276	75	298	64	72	50	43	198
-163	106215	105993	100077	98973	44	186	52	60	288	75	271	64	62	41	54	191
-162	107128	105811	100144	98250	44	160	51	57	277	83	321	80	60	57	72	177
-161	106417	106174	100163	98405	37	184	48	85	290	60	300	79	82	45	45	176
-160	106344	106335	99988	98551	36	153	40	82	279	73	315	59	90	36	58	200
-159	106506	106262	100438	98039	54	169	56	76	282	67	277	54	74	40	60	197
-158	106654	106251	99565	98757	50	159	53	74	279	85	298	64	85	42	54	199
-157	106922	105918	99853	98538	34	163	44	81	306	73	317	64	70	48	47	193
-156	106510	106506	99866	98373	51	193	53	88	303	63	281	65	70	39	54	193
-155	106554	106520	99768	98525	45	177	55	85	322	76	319	69	73	48	55	171
-154	107394	106628	99118	98232	41	206	54	75	269	66	294	72	83	41	58	170
-153	106296	106559	99936	98619	47	164	46	81	253	71	285	62	83	47	65	187
-152	106792	106504	100154	97831	44	195	49	82	299	72	281	73	60	31	51	176
-151	106919	106428	99688	98341	37	169	57	75	286	61	282	70	72	51	62	173
-150	106965	106559	99565	98277	50	191	66	68	289	77	283	54	73	46	57	185
-149	107042	106848	99164	98190	57	164	54	73	299	68	294	71	62	41	66	172
-148	106560	106549	99592	98553	44	179	64	65	304	76	299	70	81	33	56	175
-147	107062	107398	99075	97750	40	172	47	74	295	71	261	60	69	41	56	185
-146	107068	106369	99433	98545	47	175	43	73	269	88	318	71	77	39	49	185
-145	107420	106470	99744	97887	52	181	67	76	250	85	302	73	76	50	64	158
-144	107293	106596	99230	98148	35	172	61	60	318	65	273	72	79	45	57	172
-143	107453	107046	99020	97934	42	206	66	75	279	87	279	71	73	39	65	178
-142	107542	106813	99109	97928	43	177	73	57	265	58	272	78	85	41	53	207
-141	107473	106580	99205	98265	39	158	48	70	285	68	277	81	68	51	50	187
-140	107674	106754	99228	97680	42	173	52	52	245	70	307	57	83	48	60	185
-139	107869	106522	99097	97846	32	169	55	62	307	70	301	62	61	45	60	172
-138	107405	106672	99512	97793	47	187	57	54	297	72	274	74	68	46	62	194
-137	108184	106794	98482	98011	46	164	56	77	284	73	318	58	63	47	60	194
-136	108071	106714	98716	97904	46	196	43	78	287	72	294	59	73	37	48	198
-135	107949	106756	98689	98006	40	189	43	65	291	69	307	63	78	43	58	182
-134	107839	106554	98849	98199	48	171	66	72	282	84	268	93	74	50	67	183
-133	108341	106648	98751	97655	37	165	43	73	304	74	297	70	77	54	49	164
-132	108369	107077	98233	97737	42	182	50	52	331	71	285	56	70	47	70	188
-131	108372	106603	98017	98397	42	149	66	74	273	78	289	74	83	50	62	192
-130	108039	106352	98300	98743	39	176	53	70	270	78	288	83	60	40	61	173
-129	108735	106049	98149	98460	55	183	51	67	273	65	314	72	69	41	68	185
-128	108473	106548	98211	98384	41	167	53	73	302	85	279	67	71	31	48	187
-127	108915	106500	97739	98364	43	201	43	67	282	70	243	63	75	41	65	172
-126	108679	106331	98096	98364	45	187	70	70	257	80	289	71	61	28	62	183
-125	108519	106622	98313	98040	45	173	43	64	266	99	276	69	76	33	54	174
-124	109089	105873	98170	98346	53	185	53	58	291	69	269	69	78	38	49	203
-123	108552	106434	97820	98636	41	187	64	65	293	68	267	68	78	48	49	185
-122	109044	106402	97480	98585	45	162	43	63	285	79	289	69	66	41	62	191
-121	109646	105714	97187	98919	36	161	55	86	256	74	280	58	89	38	57	187
-120	108840	106317	97747	98669	44	168	39	64	257	74	270	57	73	48	51	172
-119	109762	105762	97277	98663	41	165	50	66	245	58	271	57	73	44	57	179
-118	109138	105837	97373	99005	42	153	73	66	260	77	305	85	60	52	55	169
-117	109524	106065	97518	98457	50	185	57	80	271	75	255	62	80	44	56	193
-116	108768	106217	97249	99249	38	175	53	61	255	77	290	79	84	52	52	191
-115	110010	105535	97095	98913	42	172	58	68	277	70	299	59	83	54	48	189
-114	109461	105994	97061	98984	42	192	58	74	258	79	273	76	72	35	57	170
-113	109274	105949	96960	99382	25	201	52	82	259	75	268	72	70	46	57	179
-112	109602	106139	96737	99076	41	187	61	63	268	62	263	69	79	41	49	179
-111	109976	105454	96974	99168	45	157	54	62	272	86	284	78	76	36	54	198
-110	109728	106024	96211	99519	51	196	47	70	259	75	270	72	89	54	58	169
-109	110006	105116	96353	100199	46	175	50	63	275	64	300	73	72	54	53	191
-108	110230	105316	96586	99380	55	179	53	58	273	82	280	63	76	53	66	180
-107	109790	105522	96846	99478	45	155	56	72	273	63	295	74	71	33	47	188
-106	109902	105720	96459	99587	35	173	49	63	281	77	306	70	79	48	55	192
-105	110046	105119	97042	99416	54	188	42	73	282	70	307	65	72	55	59	183
-104	110050	105688	96576	99283	44	164	45	65	281	80	271	75	81	41	63	201
-103	110265	105225	96172	100036	48	191	64	64	266	73	300	74	72	35	72	187
-102	110348	104606	96896	99728	40	161	51	68	282	80	280	62	76	34	63	185
-101	109951	105500	96029	100034	40	171	46	71	279	66	276	77	97	59	55	165
-100	110839	104340	96007	100371	51	159	48	56	271	76	281	75	67	46	51	182
-99	110434	104843	96183	100167	44	142	47	60	291	71	303	86	69	47	68	167
-98	110573	105321	95574	100246	47	170	52	60	243	68	311	70	64	51	59	188
-97	110133	104666	96040	100843	38	184	43	57	249	81	299	79	83	38	49	193
-96	110484	104340	95781	101074	41	165	55	50	224	82	301	76	74	36	47	159
-95	111047	104415	95662	100561	49	189	54	64	300	78	309	65	64	47	58	186
-94	110568	104083	95825	101318	42	169	44	61	293	88	289	68	70	44	51	182
-93	111059	103929	95462	101234	43	151	54	66	273	83	305	84	76	41	55	180
-92	110811	103668	95686	101593	37	177	49	57	282	92	288	77	89	32	50	203
-91	111328	104119	95208	101080	45	160	47	87	281	82	292	68	70	51	55	183
-90	110595	104003	94882	102186	37	179	48	73	239	75	249	69	57	36	56	205
-89	110877	103419	94912	102489	44	183	38	72	276	53	292	64	70	39	44	165
-88	110808	103216	95349	102417	40	183	26	68	290	77	268	81	64	47	49	166
-87	110819	103121	95019	102735	54	150	63	54	296	60	255	63	74	41	61	210
-86	110821	103033	94831	103120	35	151	42	72	254	74	289	64	61	40	55	189
-85	111160	102778	94889	102961	60	167	39	60	271	63	279	57	81	41	58	179
-84	110685	102810	95140	103151	28	160	50	65	239	77	285	66	63	52	51	197
-83	110462	102485	95018	103966	33	176	51	69	265	68	316	68	72	32	63	175
-82	110281	102102	94902	104442	44	161	53	73	256	62	250	65	78	50	35	170
-81	111117	101555	95000	104118	31	155	39	56	272	69	290	67	82	31	54	195
-80	111532	101473	95140	103782	40	162	48	63	253	64	300	68	68	42	45	198
-79	111120	101254	94653	104924	29	175	47	66	255	49	308	79	69	32	61	172
-78	110828	100901	94698	105457	45	166	48	64	248	56	268	76	65	32	51	156
-77	110558	100732	94419	106082	43	173	53	61	277	73	288	52	86	43	57	187
-76	110272	100726	95043	105826	43	152	50	60	267	72	305	79	75	36	51	191
-75	111095	100201	94557	105988	31	192	53	76	291	79	309	78	68	36	50	175
-74	110942	99848	94554	106586	33	191	61	82	257	65	288	72	65	50	46	195
-73	110133	99328	94923	107531	45	149	46	56	252	71	301	63	76	46	48	173
-72	110373	99245	94946	107285	39	167	47	58	263	79	280	72	65	31	41	175
-71	109973	98443	95695	107751	48	188	41	69	266	59	292	67	76	36	61	188
-70	110405	98390	95699	107327	39	165	52	54	266	77	305	85	89	41	45	184
-69	109773	98452	95553	108137	43	173	55	50	288	65	314	86	73	43	42	176
-68	109771	97644	95706	108867	39	156	56	62	274	65	322	70	70	50	64	156
-67	108943	97754	95980	109220	33	158	48	62	267	60	332	65	77	42	48	191
-66	108957	97797	96089	109131	48	164	49	60	258	57	281	72	81	52	61	164
-65	108588	97399	97059	109013	29	168	36	73	255	73	297	87	88	39	49	157
-64	108926	97250	96524	109336	35	156	49	53	244	64	299	70	68	37	43	214
-63	108698	96694	97161	109503	36	157	45	72	254	78	307	83	83	35	43	159
-62	108197	96094	96986	110623	41	170	31	63	261	73	304	65	81	35	55	193
-61	107796	95870	97717	110569	36	150	43	56	278	63	336	64	88	40	54	171
-60	107895	96059	97890	110188	41	156	46	64	251	69	304	74	74	40	33	180
-59	108077	95792	98058	110160	33	168	47	63	268	79	252	77	77	34	50	165
-58	107222	96315	98036	110342	31	185	55	65	294	68	316	73	75	35	53	178
-57	106969	95427	98351	111288	31	165	43	66	313	75	330	75	67	28	57	193
-56	106670	95258	98805	111328	36	149	35	66	284	61	337	84	92	45	51	166
-55	106497	94816	99184	111587	38	125	44	72	287	84	272	68	84	37	53	187
-54	106658	94252	99511	111625	48	145	49	61	283	78	318	56	87	33	37	184
-53	106683	94791	98899	111657	36	159	43	68	272	77	338	68	84	34	58	177
-52	105941	94317	99650	112147	34	148	40	59	263	63	317	66	74	29	46	174
-51	106024	94089	99670	112252	40	162	38	61	294	61	320	72	83	37	42	173
-50	105839	94226	100426	111680	36	157	39	63	291	75	285	63	74	39	41	154
-49	105248	93932	100258	112804	29	163	48	67	275	58	302	84	81	20	55	167
-48	105327	93827	100756	112152	40	176	48	68	319	78	365	73	74	31	48	172
-47	105481	93512	100793	112144	52	178	54	57	261	69	287	69	97	40	41	169
-46	105063	93137	100503	113387	32	166	53	55	288	73	293	65	86	32	46	174
-45	104475	93767	101392	112475	35	151	35	76	278	88	316	61	89	38	57	165
-44	104071	93094	101846	113015	33	148	49	75	295	72	304	64	95	36	51	150
-43	104339	92810	102173	112800	38	184	45	59	315	68	296	75	69	31	34	172
-42	103603	92702	101777	113834	30	168	35	75	268	80	331	70	87	31	53	176
-41	103665	92831	102672	112841	41	153	30	62	288	84	319	76	70	43	37	198
-40	103836	92382	102740	113190	30	154	46	73	313	76	322	61	77	35	61	181
-39	103127	92677	102315	113870	28	164	51	71	325	74	315	72	75	34	48	160
-38	103112	92702	103104	113092	35	184	45	64	306	72	358	64	99	28	34	168
-37	102568	92548	103440	113489	30	191	48	74	296	77	302	69	87	35	49	175
-36	102391	92935	102848	113749	40	172	50	64	314	74	314	73	84	24	36	172
-35	102239	92603	103284	113890	25	158	50	69	301	75	354	54	69	25	44	178
-34	101470	92759	103842	113905	31	167	44	73	286	78	328	70	72	39	52	161
-33	101778	92403	104331	113466	37	151	46	73	326	68	302	66	83	30	54	157
-32	101239	92697	103998	114105	35	154	47	69	328	79	322	65	85	38	38	179
-31	101348	92532	104358	113740	31	165	32	67	313	71	300	67	88	36	37	174
-30	100572	92605	104929	114005	26	190	49	60	294	72	340	68	83	22	45	182
-29	100743	92573	105179	113426	34	177	50	67	283	86	339	69	89	28	41	180
-28	101403	92205	104864	113514	42	158	49	66	283	78	298	62	70	34	49	172
-27	100662	92492	105153	113639	35	187	38	66	274	67	339	57	94	37	36	160
-26	100239	92767	105321	113546	36	161	43	76	312	76	309	77	90	37	35	176
-25	99854	92493	106118	113670	26	179	43	68	308	69	328	66	89	30	48	177
-24	99903	92781	106035	113228	41	188	37	65	276	73	344	70	80	26	37	144
-23	99513	92610	106446	113370	29	162	45	58	302	61	350	75	84	36	62	179
-22	99565	92834	106188	113446	26	176	51	67	266	84	330	64	71	38	71	171
-21	99152	92246	106887	113718	28	167	49	73	326	84	318	78	81	29	50	149
-20	98677	92707	106672	113978	35	180	46	59	317	93	345	69	82	29	44	173
-19	98701	92682	107130	113524	39	157	44	66	351	86	326	60	90	32	48	202
-18	98395	93275	107329	112937	32	153	33	69	323	82	369	59	73	24	32	160
-17	98061	93421	107021	113462	38	160	43	73	324	67	345	75	89	33	50	158
-16	98344	93309	107915	112386	29	171	48	68	311	96	342	70	85	26	51	172
-15	98165	93360	108101	112336	30	166	35	64	332	80	323	64	75	41	50	158
-14	97334	93397	108412	112812	39	169	41	77	321	72	339	90	81	39	54	161
-13	97415	93355	108408	112740	41	154	47	59	338	82	353	79	72	39	44	173
-12	97289	93893	108798	111915	30	172	45	68	340	71	318	64	78	29	69	181
-11	97403	93173	108976	112405	40	165	42	60	326	75	332	70	70	31	45	171
-10	96914	93663	109253	112143	38	179	37	74	316	85	331	67	85	42	28	171
-9	97041	93501	109062	112405	27	176	45	64	316	71	340	67	76	34	59	166
-8	96102	94243	109368	112200	43	154	53	62	358	92	309	65	78	34	42	179
-7	95895	94269	110193	111650	38	181	43	67	347	81	327	88	80	28	54	180
-6	95791	94841	109733	111717	44	169	45	76	295	74	322	78	91	28	39	183
-5	95923	94624	109769	111590	28	177	44	81	374	76	300	60	78	41	51	177
-4	94882	95177	110322	111546	31	190	40	82	324	86	322	83	77	41	43	157
-3	95622	94307	110397	111612	32	184	35	69	344	76	343	74	79	25	52	164
-2	95250	94562	111098	111003	30	158	39	62	319	66	305	61	68	31	39	174
-1	95110	94905	110362	111458	32	185	39	73	324	94	350	57	78	33	39	185
0	94715	95289	111206	110825	33	183	39	59	358	81	348	73	67	29	42	162
1	94965	94836	111061	111082	24	155	42	46	336	88	319	62	51	27	50	181
2	94979	95339	111029	110631	30	180	49	73	344	97	327	88	80	38	50	152
3	94246	95623	111318	110806	44	189	42	83	377	70	315	72	82	33	49	185
4	94482	95921	111375	110084	38	173	47	62	313	74	320	60	69	36	41	174
5	94043	95931	111597	110421	33	166	27	59	319	74	342	62	66	35	50	152
6	94087	96354	111805	109773	38	143	41	74	353	82	340	79	79	42	37	163
7	94051	96565	111593	109708	40	197	43	69	326	85	349	74	76	25	49	153
8	93734	96175	112368	109692	25	200	51	68	324	89	351	73	75	32	50	163
9	94241	97004	111765	109026	23	173	51	73	309	76	367	66	81	41	38	157
10	93664	96470	112244	109461	41	167	36	60	340	75	334	82	89	27	42	180
11	93842	97045	112137	108995	27	192	42	65	303	87	321	63	75	26	37	158
12	92890	97527	112578	108911	32	143	55	57	310	87	341	68	96	24	53	173
13	93182	97510	112397	108922	36	171	60	68	386	84	296	75	84	30	43	173
14	93243	97908	112459	108347	34	209	57	82	338	95	324	75	69	36	50	172
15	92390	97847	113213	108371	32	174	48	60	327	98	320	61	90	37	50	167
16	92930	98397	112538	108113	31	178	45	72	351	70	332	65	85	37	39	157
17	92669	98838	113197	107371	34	179	42	52	320	76	343	76	88	26	57	187
18	92722	98769	113442	107053	41	162	49	91	330	80	306	65	68	35	41	185
19	92416	98974	113136	107514	25	168	49	78	319	72	336	61	74	44	45	180
20	92941	98507	112843	107593	37	170	41	78	343	74	326	61	87	38	37	174
21	92679	98877	113264	107101	33	185	64	80	299	89	330	63	71	34	45	172
22	92499	99515	113500	106585	29	194	37	72	367	84	321	74	72	34	37	180
23	92629	99664	113819	105916	34	170	47	57	340	83	327	56	70	34	54	164
24	92239	99797	113538	106449	23	176	46	81	324	78	290	74	77	32	43	168
25	92434	99786	113739	106138	39	174	52	71	300	79	342	66	63	32	41	188
26	92538	100689	113091	105636	32	179	38	60	305	78	327	70	88	35	49	207
27	91910	100688	113610	105766	36	174	59	56	322	89	321	60	73	37	61	180
28	92180	100998	113666	105220	36	163	48	73	317	79	317	74	74	27	27	168
29	92256	101458	113213	105177	33	146	52	62	316	92	316	48	70	27	50	160
30	92266	101180	113699	104897	35	170	54	73	340	87	332	77	75	40	41	158
31	92369	101582	113465	104783	25	202	49	65	326	78	285	66	82	34	42	154
32	92656	101999	113239	104175	47	166	57	54	345	93	318	62	82	27	35	179
33	92245	101912	113909	104000	19	169	42	68	322	90	318	72	77	35	47	191
34	92933	102275	113695	103220	43	165	52	53	322	64	311	65	77	33	49	174
35	92531	102450	113771	103291	33	174	60	61	302	100	296	61	68	28	51	142
36	92853	102288	113471	103432	32	183	58	69	297	87	325	86	80	33	49	164
37	91768	103626	113482	103074	33	180	53	68	338	90	307	74	77	24	35	145
38	92447	103419	113336	102961	24	195	40	64	327	86	310	63	69	22	44	151
39	92801	103826	112791	102654	42	180	54	72	302	89	304	56	76	34	33	161
40	92245	103644	113136	102952	34	162	40	56	318	77	248	59	71	25	34	170
41	92710	104286	112601	102343	32	180	46	63	322	93	312	72	73	28	49	151
42	92780	103615	112896	102684	30	192	36	67	335	71	303	53	78	33	37	181
43	93184	104587	112747	101484	22	172	48	81	305	73	308	70	71	30	46	176
44	93141	104397	112573	101825	24	188	44	79	310	82	288	68	79	19	49	156
45	93941	104363	112621	101133	36	161	57	68	337	100	300	47	79	38	35	190
46	93113	105215	111978	101562	29	182	61	66	316	77	317	62	61	48	50	149
47	93672	104433	112379	101661	26	172	50	64	313	87	280	66	83	32	53	162
48	93474	105651	112095	100796	35	182	47	60	293	61	261	72	61	36	45	164
49	94201	106009	111564	100224	27	165	50	73	324	88	295	66	68	29	49	158
50	93812	105544	111951	100670	42	174	46	79	313	92	307	59	79	27	38	181
51	93895	106253	111799	99995	32	159	40	69	328	106	296	51	80	44	48	163
52	94138	106123	111739	99953	32	186	57	64	284	86	292	61	93	36	35	170
53	94230	107140	110829	99696	40	190	52	73	297	71	260	70	62	33	36	137
54	94274	106851	110949	99886	39	192	40	82	300	74	277	73	71	28	50	165
55	94476	106853	110877	99682	40	183	42	76	283	72	292	64	71	33	38	169
56	95210	106867	110687	99092	33	175	56	68	327	107	289	64	75	30	52	179
57	94617	107713	110924	98703	25	178	50	76	310	75	303	65	62	33	53	148
58	95696	107431	110826	98019	38	180	67	64	296	71	254	51	95	30	53	131
59	95796	108152	109695	98243	32	210	63	62	284	70	255	63	70	22	40	157
60	95412	108163	110218	98086	39	165	49	75	321	69	262	55	68	45	45	178
61	96135	107813	110178	97802	36	160	45	75	300	70	283	63	58	33	46	183
62	96527	108208	109943	97108	24	167	50	75	303	64	275	60	73	37	41	182
63	96268	109239	109313	97160	40	181	64	71	308	77	303	64	81	37	51	167
64	96992	109160	108737	96943	51	161	54	68	296	77	253	61	84	47	44	158
65	96775	109535	108673	96965	46	182	38	57	297	71	264	59	71	39	45	153
66	97459	109392	108662	96308	37	175	47	61	325	89	284	74	70	25	40	162
67	97076	109622	108999	96229	27	182	53	66	283	76	272	69	81	38	49	176
68	97685	109818	108563	95845	37	179	32	67	290	83	294	74	68	43	46	171
69	98124	110414	107828	95518	42	192	62	74	300	77	280	75	62	39	51	176
70	98324	110228	107378	95811	46	160	48	63	317	79	277	50	59	30	54	173
71	98615	110464	107156	95614	39	184	50	65	283	87	281	62	48	34	37	194
72	98914	110239	107051	95672	38	198	48	70	300	88	277	63	69	40	47	172
73	99424	110626	106550	95244	38	179	41	67	274	73	290	57	75	34	43	189
74	99370	111007	106567	94840	43	186	46	67	264	79	270	61	76	38	51	148
75	99179	111520	106037	95049	51	184	44	56	307	73	243	56	73	41	37	204
76	100012	111072	105436	95318	42	202	48	65	278	66	277	62	71	33	40	178
77	100079	110854	105874	95097	39	173	51	73	274	64	256	65	66	44	47	154
78	100704	111195	105138	94737	48	196	47	60	311	74	257	74	74	40	49	179
79	101020	111466	104545	94746	41	185	53	65	284	67	286	65	65	40	48	189
80	101334	111732	103550	95008	52	175	69	58	306	78	260	63	78	48	63	188
81	100732	111336	104083	95679	50	168	43	68	272	78	270	70	68	44	60	189
82	101735	111041	103698	95277	44	169	49	72	300	72	260	63	65	39	55	158
83	102549	110969	103797	94426	46	176	51	63	298	68	279	71	57	30	52	208
84	102323	111400	103205	94927	39	184	55	72	295	72	285	63	60	33	55	186
85	102879	111774	101901	95080	36	188	52	68	264	62	271	57	61	42	45	174
86	102287	111380	102635	95391	48	193	57	67	311	72	274	76	71	39	41	153
87	103026	111180	101904	95532	49	186	55	64	291	64	262	68	69	53	46	189
88	103090	110793	102328	95462	48	195	52	58	298	78	280	69	63	33	52	177
89	103603	110976	102003	95100	51	179	60	63	263	73	285	70	73	41	53	172
90	103460	111251	101205	95930	58	175	54	61	294	59	290	66	67	46	48	166
91	103694	111404	101100	95470	52	163	60	70	295	66	272	63	76	51	40	186
92	103268	111185	101383	95917	53	172	55	72	261	86	276	67	79	42	47	169
93	103573	111654	100616	95860	45	197	44	63	302	72	278	69	69	37	48	178
94	103876	110920	100920	95944	30	161	57	64	302	79	291	73	72	43	54	164
95	104247	111118	100755	95519	43	193	55	71	255	84	251	66	94	38	42	182
96	104286	110598	100531	96174	43	158	49	61	278	61	298	79	66	55	56	176
97	103606	111076	100708	96238	51	181	50	67	302	77	251	53	83	37	53	150
98	104342	110837	100452	96088	48	184	41	70	303	71	280	63	81	41	35	181
99	104274	110906	99821	96548	49	171	47	74	286	66	283	67	82	45	52	188
100	104837	111018	99850	95865	40	183	61	70	291	85	275	60	73	58	34	196
101	104707	110723	99371	96708	54	189	65	80	253	76	256	81	76	45	51	170
102	104610	110319	99810	96734	45	177	51	76	271	70	289	74	61	45	47	186
103	104827	110702	99248	96701	48	184	58	64	289	74	281	71	73	43	54	158
104	104658	110466	99501	96776	34	182	53	65	274	58	287	65	64	33	43	183
105	104906	110514	99093	96933	43	171	63	63	283	82	269	65	60	43	35	154
106	104940	110627	99150	96730	49	195	59	66	300	83	247	72	68	44	45	158
107	105378	109966	99509	96759	52	192	58	64	296	65	293	75	71	42	50	165
108	104852	110092	99717	96822	34	183	47	69	286	74	238	83	90	49	39	190
109	105362	109808	99560	96602	40	154	56	61	276	58	259	74	80	44	61	178
110	105175	110141	98842	97270	48	158	49	55	291	70	283	67	77	51	41	164
111	105167	110495	98564	97195	44	167	45	69	273	85	283	75	59	44	58	175
112	104702	110485	98981	97318	33	190	52	57	264	72	246	72	66	39	51	188
113	105205	110264	98629	97335	43	176	55	60	303	68	256	50	80	50	54	193
114	105272	109558	99277	97298	48	195	58	63	268	67	275	73	74	53	47	186
115	105582	109804	98834	97156	51	196	50	71	253	92	269	62	89	45	47	161
116	105659	109548	98413	97794	43	190	55	49	310	75	279	69	72	39	56	150
117	105706	109648	98549	97451	46	185	53	74	296	65	269	76	66	43	58	171
118	105985	109772	98381	97157	41	187	62	68	294	67	288	63	81	27	47	188
119	106222	109249	98084	97726	38	178	59	68	296	73	268	81	80	35	62	179
120	106095	109634	97907	97586	36	170	63	45	303	83	269	71	72	46	51	165
121	105978	109674	97955	97794	35	201	54	76	274	90	282	71	69	32	48	179
122	106412	109751	97697	97484	43	176	51	60	311	85	280	82	81	32	51	159
123	106086	108930	97987	98287	37	180	54	86	266	68	271	70	72	48	55	183
124	106201	109267	97709	98339	40	186	51	49	265	69	268	62	90	41	42	178
125	105693	109164	98530	97965	41	178	65	67	277	77	294	72	79	43	57	178
126	106488	108450	97927	98420	55	210	46	61	285	77	259	60	58	51	45	187
127	106792	108795	97665	98029	44	199	51	65	268	74	271	65	74	53	38	193
128	106531	108489	97824	98383	35	144	52	71	274	66	300	61	63	42	49	200
129	106570	108407	98139	98172	57	180	46	63	270	89	283	85	77	57	62	199
130	106338	108958	97975	98010	42	193	60	68	273	66	296	74	72	43	55	187
131	106260	108992	97720	98402	44	185	50	53	298	65	299	85	71	46	53	190
132	106080	109025	98120	98149	56	190	52	60	287	81	277	68	70	31	56	156
133	106422	108787	97572	98469	47	164	55	62	289	75	294	85	87	44	50	196
134	106448	108349	97559	98839	40	171	63	64	263	76	262	55	72	46	57	156
135	106916	108355	97847	98219	39	173	51	78	267	75	272	70	75	49	62	173
136	106330	108480	97661	98839	52	181	57	82	298	78	270	62	71	43	53	157
137	106636	108127	97538	98985	50	186	61	66	301	70	277	57	82	44	73	174
138	106871	107948	97302	99154	38	162	58	71	268	83	289	74	57	41	57	177
139	106763	107795	97595	99066	40	174	56	51	314	78	275	69	75	48	54	198
140	106500	107897	97613	99273	46	186	50	60	294	66	291	65	81	36	56	155
141	106361	107641	97889	99585	38	193	51	75	283	74	300	77	81	31	56	186
142	106471	107430	98199	99314	46	168	53	68	265	76	292	69	72	33	55	171
143	106584	107440	97758	99463	38	183	56	51	303	70	301	73	83	41	61	196
144	107067	107280	97335	99654	42	169	58	58	290	74	274	67	80	37	60	184
145	106557	107488	97565	99709	42	160	43	72	275	69	280	59	64	54	59	154
146	106424	107039	98342	99392	38	199	59	82	285	60	291	76	61	42	56	193
147	106344	107298	97861	99703	42	196	60	65	319	64	301	63	89	42	64	180
148	106520	107238	98007	99338	45	185	52	70	267	96	301	70	69	32	44	200
149	106521	107417	97487	99947	47	194	62	55	308	85	304	72	81	43	59	156
150	106745	106915	97657	99972	47	177	52	59	287	59	264	77	66	49	56	198
151	106607	106925	97924	99881	49	175	52	70	305	84	309	70	73	48	61	176
152	106350	106561	98174	100116	32	199	62	68	302	80	294	72	73	40	45	179
153	106195	106962	98459	99653	51	192	53	57	273	81	271	66	73	30	57	188
154	106410	107599	97844	99563	50	168	50	71	297	84	280	83	84	37	46	161
155	106441	106737	97949	100093	40	165	45	80	282	65	288	60	69	36	59	182
156	106283	107224	98105	99583	52	171	58	62	293	66	278	64	54	36	46	190
157	106561	106738	98115	99780	57	176	51	70	285	80	275	76	82	43	57	194
158	105942	106503	98828	99916	40	179	46	58	284	86	327	73	59	30	39	182
159	106136	106544	98325	100124	39	206	51	63	280	67	293	70	78	40	45	162
160	105408	107048	98686	100163	45	189	54	72	306	88	298	61	74	39	44	182
161	106232	106263	98004	100757	44	179	50	67	260	78	308	73	71	39	46	162
162	105965	106104	98888	100178	43	194	59	57	316	78	305	61	83	46	39	187
163	105676	106751	98699	99981	52	183	61	70	295	68	307	76	74	47	49	171
164	105414	106669	98541	100553	35	183	56	60	287	76	330	64	67	38	50	175
165	105265	106826	98714	100303	40	181	60	61	299	86	269	61	89	42	58	158
166	105732	106043	98901	100487	48	172	46	72	264	94	278	61	68	35	45	172
167	105984	106298	99134	99734	55	190	48	68	288	75	283	74	73	48	56	188
168	106143	106402	98647	100015	45	187	57	69	296	87	270	78	66	47	63	163
169	105399	106369	99107	100190	47	199	53	73	276	68	263	78	72	40	46	178
170	105661	106054	99380	100193	43	171	46	65	330	79	300	65	67	36	46	172
171	105287	106176	99076	100653	54	186	44	58	345	62	272	69	66	36	51	168
172	105076	106123	99191	100706	49	195	61	73	292	82	313	64	84	37	48	165
173	105320	106331	98657	100870	37	167	48	67	285	57	295	84	76	46	45	163
174	105454	105836	99294	100431	42	168	46	74	264	92	271	67	61	40	40	156
175	105575	105674	99368	100511	37	181	62	68	262	77	300	75	64	27	46	177
176	105348	106028	99477	100276	52	185	65	61	285	74	289	74	77	42	52	157
177	105144	106250	99061	100727	49	176	50	64	298	73	267	68	92	22	49	182
178	105347	105639	99676	100436	45	196	59	64	290	75	318	72	68	34	54	185
179	105262	105950	99270	100666	46	169	52	71	287	76	300	78	83	45	56	191
180	105714	105756	99362	100428	39	174	45	54	275	75	281	73	70	56	54	183
181	104751	106057	99494	100739	36	187	44	66	301	69	274	70	74	37	64	174
182	105037	105778	99736	100565	47	157	61	56	294	78	270	60	67	25	34	164
183	104471	106170	100055	100554	45	183	40	55	277	70	299	72	82	40	37	176
184	105015	105519	100072	100575	37	178	68	72	294	72	280	63	80	32	49	187
185	104294	106128	99956	100706	49	215	63	74	314	69	258	71	87	43	49	185
186	104983	105827	99970	100422	46	198	44	66	295	74	296	70	76	57	44	179
187	104614	105589	99794	101037	46	176	54	68	276	92	283	75	74	43	53	191
188	104328	105782	100165	100815	62	193	62	56	268	65	284	65	85	46	42	159
189	104935	105503	100099	100615	43	163	55	81	283	66	319	76	69	53	46	189
190	104659	105824	99956	100633	45	205	46	72	295	75	287	79	72	32	60	174
191	105010	105675	99970	100391	41	176	47	66	291	58	275	88	78	37	50	181
192	104570	105342	100500	100784	36	176	62	73	276	89	301	67	75	38	47	166
193	104724	105483	99900	100823	48	165	58	64	321	67	302	63	65	39	49	183
194	104685	105140	100551	100664	45	166	50	72	265	74	282	67	71	36	46	177
195	104282	105759	100600	100387	49	189	55	65	277	87	297	59	69	48	49	187
196	104324	105499	100541	100743	49	165	55	63	263	89	328	68	68	37	51	180
197	104015	106117	101095	99859	39	178	56	65	315	67	316	69	86	38	58	164
198	104118	105576	101140	100129	29	180	52	51	300	81	279	97	76	37	50	170
199	104570	105765	100582	100097	44	164	62	75	311	92	308	67	65	46	48	190
200	104343	105308	100650	100732	42	198	62	58	306	77	317	64	80	39	67	152
201	104317	106002	100538	100247	35	181	58	72	268	71	270	62	63	44	61	192
202	104220	105717	100723	100373	57	183	57	69	315	79	307	52	88	26	62	228
203	104505	105557	100584	100288	31	163	51	81	318	70	314	71	57	41	42	168
204	104787	105314	100522	100314	50	180	59	61	281	69	307	71	86	32	59	172
205	104405	105651	100643	100315	46	182	42	53	273	58	318	62	88	41	57	150
206	104488	105267	101031	100168	43	141	43	74	283	70	278	77	68	40	58	181
207	104538	105943	100719	99807	47	177	45	75	290	88	246	75	76	33	58	170
208	104236	105661	100821	100191	44	176	55	62	296	73	297	80	68	40	51	188
209	104139	105158	101054	100505	39	189	47	61	311	65	277	52	68	42	43	164
210	104311	106214	100915	99489	43	187	39	66	273	69	318	64	76	44	67	183
211	104124	105781	100904	100227	60	174	53	84	286	62	274	61	84	43	62	168
212	104139	105784	101106	99998	38	176	53	58	302	73	282	56	73	40	57	165
213	104471	106056	100667	99737	42	173	53	71	299	68	295	69	70	42	52	174
214	104143	105505	101076	100305	38	171	61	65	310	79	315	80	67	54	61	176
215	104623	105307	100985	99958	42	147	58	79	290	82	277	75	72	43	45	181
216	104100	106237	101155	99358	40	144	56	69	255	69	287	74	88	46	54	169
217	103457	106378	100790	100224	40	199	51	65	321	95	290	68	73	43	48	178
218	104446	105817	100840	99766	43	172	46	65	310	76	320	76	64	56	52	163
219	104179	105774	100917	100010	48	167	45	51	280	80	268	56	75	44	62	192
220	104208	105497	101225	100028	32	188	52	54	273	87	250	57	69	40	56	199
221	104411	105456	100738	100254	50	187	53	70	292	71	294	62	66	45	47	183
222	104620	106125	100345	99773	39	192	58	71	290	72	312	63	72	52	53	163
223	104223	105820	100862	99965	42	165	49	70	303	66	300	63	69	47	50	176
224	104239	105605	100958	100026	33	176	47	75	301	76	305	72	77	40	52	192
225	104274	106147	100575	99846	46	211	43	81	276	69	308	63	70	44	51	182
226	103818	105616	101516	99806	32	172	33	58	316	73	314	66	76	50	64	176
227	104819	105489	100703	99840	32	189	55	80	310	75	308	70	64	40	59	181
228	104267	105790	100860	99965	45	183	52	73	271	74	301	61	93	45	59	164
229	104549	105407	100460	100600	31	166	56	77	317	57	305	75	85	57	52	177
230	104326	106004	100418	100089	34	158	61	87	298	75	286	69	69	39	46	165
231	104434	106147	100610	99782	34	168	53	76	284	93	290	60	85	53	51	158
232	104487	106192	100345	100034	42	188	50	72	306	70	294	76	55	39	55	172
233	104687	106016	100542	99678	43	183	55	61	288	80	304	75	67	55	60	186
234	104287	105806	100773	100022	30	174	64	64	277	73	320	77	64	55	45	158
235	104364	105567	100506	100441	47	184	45	73	290	81	312	66	83	42	49	160
236	104626	105307	100530	100498	49	177	39	61	313	61	322	71	80	40	56	185
237	104837	105649	100652	99730	27	165	54	65	298	68	280	66	72	38	62	173
238	104340	105613	100847	100021	35	179	58	67	267	82	287	67	79	46	48	173
239	104219	106215	100667	99594	43	182	55	54	299	71	280	70	63	39	47	181
240	104599	105635	100583	99890	34	167	50	63	296	94	295	68	66	38	34	192
241	104820	105916	100363	99712	35	184	51	80	304	64	316	62	73	54	52	188
242	104172	106138	100276	100159	44	192	50	65	287	80	284	58	75	46	51	173
243	104320	105900	100671	99709	47	179	51	67	299	71	275	54	84	47	41	176
244	104015	105963	101053	99793	51	189	45	52	303	76	300	73	62	50	57	180
245	104685	105498	100572	100002	40	178	64	69	289	90	282	68	70	45	49	173
246	104840	106033	100149	99651	36	174	45	65	286	63	301	74	67	52	47	186
247	104121	105895	100766	99887	42	202	56	73	260	66	292	84	74	47	54	178
248	104341	106057	100815	99394	28	158	50	70	301	77	281	60	63	46	57	174
249	104369	105871	100486	99976	39	152	57	70	315	79	285	70	71	36	44	154
250	104291	105934	100428	100196	51	178	43	64	290	88	307	53	66	31	64	178
251	104237	106431	100005	99928	46	163	53	73	312	89	285	64	71	43	54	160
252	104203	106253	100577	99665	36	165	42	67	295	89	291	50	76	45	51	169
253	104984	105259	100688	99692	41	183	48	73	300	64	284	66	83	34	45	165
254	104599	106073	100234	99735	44	160	47	75	311	71	301	71	71	46	56	156
255	104521	105628	100688	99957	37	183	41	70	293	80	279	73	70	37	39	177
256	104348	106465	100177	99700	46	172	40	76	264	76	277	72	72	38	56	175
257	104926	105546	100722	99410	39	177	51	71	284	58	276	72	74	44	59	174
258	104505	106260	99943	99826	47	163	61	65	314	66	298	71	76	64	54	191
259	105074	105441	99951	100135	31	173	44	74	275	59	319	78	76	36	64	154
260	104158	105728	100396	100297	37	178	43	73	281	69	306	65	89	39	54	156
261	104299	106103	100331	99775	35	185	60	72	289	73	291	76	61	38	52	182
262	104560	105520	100150	100319	37	191	48	61	303	86	317	61	83	39	62	191
263	104722	106010	99838	100032	49	196	48	75	324	76	274	62	66	40	49	202
264	104501	106103	100048	100110	42	173	51	68	292	64	293	69	56	45	55	177
265	104560	105926	100308	99930	43	174	66	70	303	73	282	62	88	51	43	189
266	104793	105595	100623	99710	31	200	41	74	292	106	285	70	80	41	41	206
267	104922	105602	99758	100351	53	177	51	64	310	83	318	81	72	35	47	175
268	104979	105284	100015	100381	38	168	56	72	306	67	280	61	71	34	46	162
269	104424	106402	100115	99742	44	205	55	75	329	63	326	75	90	31	54	182
270	104552	105994	100004	100022	38	172	41	75	310	72	270	59	87	49	45	181
271	105234	105531	99868	100071	37	166	43	79	283	53	329	77	88	36	53	172
272	104592	105586	100368	100221	46	187	48	63	287	67	262	63	67	44	49	160
273	105071	105846	99972	99723	43	179	49	65	298	75	283	63	69	37	52	181
274	104690	106296	100085	99697	46	172	54	73	319	62	271	74	66	32	62	164
275	104430	105718	99989	100617	38	167	44	52	308	95	322	88	79	41	41	175
276	105057	106228	99297	100113	44	172	60	64	305	98	293	67	62	39	46	180
277	104828	105960	99867	99970	44	191	58	70	302	83	268	64	79	50	56	190
278	104430	105954	100407	99935	47	165	57	67	297	70	284	70	66	42	49	189
279	104997	105808	100190	99617	41	161	60	83	266	70	272	65	88	51	55	181
280	105125	106047	99552	100073	50	173	64	48	290	81	320	65	74	41	44	187
281	104703	106181	99896	99888	46	176	45	53	326	85	272	66	75	54	48	198
282	104041	106018	100181	100542	39	188	55	77	281	78	266	62	64	37	59	177
283	104521	106537	99916	99696	45	211	47	71	289	72	332	64	72	36	62	202
284	104872	105889	99863	99996	44	146	48	70	291	86	290	85	74	42	58	180
285	105161	105813	99691	100030	44	178	28	71	290	73	299	62	77	52	50	213
286	104692	106035	99859	100188	50	172	55	64	280	71	305	61	69	39	48	181
287	104842	106055	99799	100087	41	190	44	68	269	53	285	82	86	43	41	163
288	104485	106416	99635	100171	62	188	53	65	339	80	291	64	84	56	59	197
289	104333	106459	99512	100486	41	166	61	64	260	77	307	70	81	49	60	161
290	104700	105767	99495	100698	35	183	41	66	278	87	265	63	83	41	54	174
291	104662	106059	99751	100215	49	177	37	67	272	67	311	75	67	54	66	176
292	104487	105976	99715	100495	45	178	45	84	289	64	296	58	85	45	47	174
293	104990	106157	99540	99860	43	171	46	68	276	75	272	69	73	48	40	193
294	104768	106502	99415	99966	47	155	65	73	297	92	297	73	83	30	45	180
295	105139	106115	99612	99960	36	173	54	69	269	78	296	75	64	29	51	193
296	104476	106465	98784	101043	42	174	64	59	296	72	295	68	66	43	44	174
297	104766	106638	99118	100218	34	179	57	69	279	74	274	60	56	50	57	187
298	104169	106907	99540	100091	44	178	51	54	295	79	283	81	74	41	47	172
299	104745	106306	99405	100208	46	153	52	58	290	71	302	80	63	43	48	185
300	104488	106574	99721	99849	49	149	64	67	272	76	294	59	76	38	52	188
301	104774	106383	99551	99870	41	193	61	86	318	63	261	72	66	45	50	176
302	104732	106736	99688	99580	45	197	59	60	283	67	295	81	72	43	44	160
303	104281	106640	99765	99912	39	196	60	56	308	78	300	73	70	46	56	173
304	104763	106678	99475	99704	40	159	58	83	293	68	305	64	79	56	65	160
305	104513	106230	99912	99968	35	197	55	57	261	83	296	64	76	51	59	165
306	104506	106705	99521	99964	37	183	63	62	270	65	289	72	73	39	62	173
307	104516	105812	99795	100387	38	165	55	74	293	71	290	78	75	39	50	169
308	104991	106658	99294	99619	43	172	44	64	278	69	272	81	83	34	55	171
309	104599	106915	99305	99755	50	148	63	66	314	90	274	68	66	39	54	179
310	105081	106366	99515	99738	36	165	55	78	297	97	317	68	79	55	35	166
311	104336	106680	99276	100285	33	186	52	70	298	72	276	87	71	29	42	181
312	104779	107047	99450	99319	46	179	67	60	289	73	281	60	68	36	54	173
313	104803	106438	99490	99919	31	172	53	62	296	72	294	72	66	37	58	168
314	104576	106629	99349	99916	43	165	60	76	308	81	292	56	72	49	42	181
315	104675	106632	99573	99665	39	169	59	63	273	91	278	60	66	37	35	172
316	104975	106380	99686	99613	49	189	63	84	279	75	301	77	69	46	48	172
317	104477	106434	99754	99890	43	171	50	76	331	88	292	80	60	48	52	173
318	104824	106771	99428	99604	45	192	50	59	275	72	306	62	82	45	46	153
319	104969	106426	99743	99448	40	186	59	68	302	62	318	84	79	39	56	187
320	104734	107053	98859	99865	39	155	51	77	268	79	268	61	73	39	51	161
321	104207	106715	99282	100223	43	180	59	58	272	74	282	65	61	37	46	180
322	104475	106879	99237	99894	37	195	49	62	291	71	305	62	69	45	44	190
323	104719	106256	99278	100213	30	187	52	66	296	72	247	80	87	30	40	163
324	104769	106346	99423	99939	30	172	57	58	288	65	293	63	61	45	44	176
325	104609	106695	99445	99830	48	163	47	85	288	59	320	60	69	41	53	200
326	104841	106763	99593	99420	26	201	56	55	297	69	292	58	77	50	54	171
327	104832	106883	99354	99494	46	207	42	64	292	73	288	55	67	36	46	184
328	104791	107068	99598	99148	34	183	59	82	264	79	280	68	83	41	49	171
329	104492	107267	99614	99195	38	188	55	54	262	69	276	88	73	43	52	173
330	104502	106844	99257	99899	47	184	45	75	305	68	308	65	68	49	49	178
331	104963	106443	99210	99995	34	149	42	80	301	75	295	61	71	42	45	194
332	104635	106803	99864	99198	31	170	49	67	328	87	280	79	78	46	53	181
333	104413	106715	99598	99644	47	198	39	57	288	75	279	69	79	37	53	189
334	104887	107031	98973	99530	58	170	49	64	281	71	279	72	88	43	44	165
335	104824	106951	99375	99267	46	160	43	83	298	82	273	58	73	39	54	171
336	104748	106901	98977	99795	44	181	52	69	299	76	314	68	75	36	46	191
337	104977	106838	99031	99616	41	161	55	58	286	70	271	82	72	42	45	189
338	104913	106886	99126	99585	51	182	39	75	300	67	287	67	73	38	55	170
339	105372	106554	98999	99580	43	177	49	70	288	63	299	65	72	45	66	180
340	104803	107177	99409	98975	41	154	44	67	296	81	252	67	65	52	57	205
341	105179	106408	99159	99531	43	147	61	61	275	82	270	83	84	43	59	183
342	104828	107401	98813	99344	43	170	58	84	277	68	280	73	80	45	54	190
343	105057	106670	99504	99325	38	191	43	76	283	65	305	53	87	37	53	194
344	104035	106987	99777	99678	42	179	53	70	293	81	264	68	71	34	47	202
345	105141	106604	99597	99059	47	167	40	61	324	64	303	88	74	40	62	178
346	104663	106648	99769	99413	47	159	48	55	289	75	286	73	63	48	55	169
347	104878	107030	99228	99224	42	170	56	74	285	72	303	62	78	32	48	154
348	104645	107122	99459	99210	44	179	47	65	267	70	311	66	79	35	56	180
349	104873	106415	99248	99728	40	186	44	53	273	84	282	72	66	44	52	163
350	104994	107181	99084	99004	32	188	49	70	281	73	298	57	72	44	51	164
351	104535	106773	99556	99506	47	194	52	48	295	73	290	70	77	42	32	174
352	104734	106655	99138	99882	46	155	54	63	284	63	269	71	75	38	62	158
353	104371	107513	99531	98914	37	181	53	65	305	76	259	75	77	43	37	163
354	105351	106875	99203	98874	47	171	60	65	304	74	281	63	67	37	47	159
355	104827	106708	99592	99192	52	174	60	67	284	69	296	90	70	54	44	180
356	105545	106795	99021	99051	41	151	57	69	296	58	299	79	74	44	39	158
357	105040	106750	99033	99487	41	167	51	51	309	69	273	86	77	45	55	170
358	104880	107030	98989	99532	34	166	49	61	308	53	288	78	87	43	60	173
359	104820	106848	99388	99094	39	178	70	52	289	88	312	59	59	43	46	170
360	104876	107282	99359	98755	45	183	70	56	288	62	319	73	76	27	61	192
361	104982	106781	99111	99332	38	170	50	64	274	72	307	81	82	42	53	169
362	104738	106655	98973	99800	40	161	53	58	303	85	313	65	69	42	51	176
363	104765	106091	99515	99775	45	169	52	60	312	73	267	64	68	53	56	180
364	104811	106615	99717	99024	50	171	52	63	299	79	295	76	73	47	51	175
365	105405	106721	98888	99334	47	156	44	76	302	66	336	67	72	46	41	174
366	104679	106412	99281	99914	44	194	40	66	298	60	281	75	60	35	71	192
367	104936	106943	99457	98997	29	217	57	72	277	84	279	65	67	36	51	175
368	104764	107086	99457	98893	49	173	57	62	291	86	323	64	81	37	55	169
369	105028	106790	99148	99200	37	161	54	73	315	79	333	72	82	40	57	192
370	104852	106340	99356	99514	44	173	55	62	299	71	282	65	78	42	52	151
371	104693	106911	99460	99178	39	175	52	58	281	71	274	62	82	51	39	198
372	105518	106804	99081	98833	46	175	47	73	291	77	315	69	80	37	53	170
373	105289	106429	99387	99104	48	176	55	76	311	84	289	69	74	44	52	190
374	104976	106461	99247	99455	48	191	53	85	279	66	294	71	63	43	42	176
375	104798	106847	99430	99143	46	172	40	68	306	70	294	91	77	48	59	167
376	104997	106855	99000	99356	47	162	62	58	264	78	308	75	67	42	59	162
377	104863	106466	99296	99534	43	179	53	63	319	60	321	79	74	31	58	194
378	104689	106710	99018	99685	39	171	58	60	295	91	302	75	70	47	52	153
379	105781	106188	99318	98844	45	181	65	64	314	72	274	64	74	33	44	183
380	105020	106342	99463	99374	46	184	46	69	275	73	302	69	82	46	50	187
381	105308	106165	99360	99273	39	173	52	60	295	64	307	74	69	42	54	167
382	105333	106655	99239	98978	39	182	46	70	313	88	272	54	85	46	60	170
383	105393	106626	98948	99178	41	172	51	68	326	54	292	81	85	36	54	200
384	104931	106215	99407	99546	52	189	62	71	296	81	288	69	65	38	42	193
385	105396	105749	99691	99204	51	210	56	73	289	68	285	65	72	53	46	180
386	105013	106116	99318	99384	40	199	61	71	307	83	302	73	68	37	50	170
387	105050	106239	99539	99225	37	191	54	64	295	60	311	78	75	49	42	179
388	106077	106408	98575	98800	32	177	56	69	287	75	281	70	73	38	51	184
389	105296	106120	99146	99365	40	161	55	88	290	87	295	70	76	36	52	172
390	105137	106320	99179	99227	34	180	50	71	320	76	294	67	64	42	56	186
391	105008	106063	99454	99469	45	198	47	60	299	83	283	88	52	44	61	172
392	104866	106762	99219	99177	41	201	66	67	282	66	304	60	84	34	59	162
393	105116	106418	99463	98842	46	166	50	60	308	77	273	52	59	42	49	184
394	104940	106118	99278	99625	49	175	44	71	274	79	302	61	63	40	60	189
395	104915	106525	98988	99600	44	180	53	70	325	71	285	65	68	49	56	159
396	105215	106324	99115	99362	51	215	53	49	316	78	300	77	69	47	44	178
397	105405	105801	99450	99348	33	156	57	72	281	81	273	68	78	37	56	185
398	104892	106292	99532	99297	44	157	56	55	289	71	306	64	72	40	53	181
399	105172	106364	99426	98974	40	158	54	68	285	69	269	66	71	35	58	173
400	105181	106227	99492	99045	39	187	54	58	319	82	334	69	59	42	61	165
401	104785	106566	99157	99515	45	181	50	69	285	69	286	80	59	43	45	177
402	105295	105867	99475	99356	39	201	52	79	269	69	323	63	91	47	66	165
403	105131	105994	99460	99249	47	169	53	78	284	68	288	72	75	38	48	188
404	105215	106191	99528	99146	30	193	60	52	325	79	299	74	79	49	67	195
405	105314	106529	99126	98972	36	177	55	87	302	68	308	77	77	42	45	159
406	105148	105999	99381	99228	44	169	50	74	308	66	292	73	62	46	56	188
407	105335	106340	99009	99207	41	175	46	75	287	72	304	68	71	46	55	179
408	104808	106207	99336	99585	43	206	66	76	291	78	290	60	67	40	53	191
409	105488	105716	99502	99120	57	179	59	71	298	66	303	65	74	57	56	184
410	105754	105613	99013	99492	45	198	49	75	274	71	303	77	85	52	35	208
411	105164	106370	98821	99444	42	171	50	85	273	88	274	76	71	47	43	174
412	105921	105916	99265	98840	31	185	48	81	286	72	290	68	69	39	55	179
413	105013	106358	99364	99052	51	167	63	65	267	66	283	53	75	42	43	167
414	105367	105690	99788	98934	46	188	42	88	315	71	332	55	71	48	39	166
415	105314	105709	99446	99313	29	184	55	72	314	75	285	74	69	53	69	183
416	104840	106293	98791	99903	46	162	54	66	305	85	316	69	72	41	40	166
417	105470	105784	99479	99092	44	170	62	87	310	87	309	47	57	31	60	198
418	105371	106047	98988	99413	42	182	56	66	310	87	295	63	59	39	56	182
419	105221	106118	99583	98896	34	175	57	72	287	68	268	59	67	44	62	188
420	105723	105768	98911	99424	44	180	43	73	269	60	296	83	75	30	40	163
421	105594	105638	99171	99356	37	190	57	82	270	57	269	79	70	36	47	165
422	105022	106360	99111	99272	35	194	53	74	294	71	281	62	76	40	52	185
423	104747	106145	99164	99747	49	170	45	60	301	66	309	60	65	42	52	174
424	104855	105770	99608	99602	46	188	49	63	317	83	318	65	82	36	58	162
425	105307	105636	99475	99272	32	185	47	75	336	87	325	60	86	48	54	191
426	105484	105804	98919	99626	44	167	51	73	293	78	271	80	73	42	52	178
427	105722	106255	98835	98866	38	174	49	69	297	90	278	59	59	55	61	186
428	105295	105340	99424	99714	43	152	46	79	299	73	275	59	71	48	58	176
429	105731	106025	98919	99148	37	188	49	66	295	76	262	65	68	55	54	185
430	105130	105789	99328	99494	33	171	50	81	302	83	302	48	70	59	54	176
431	105333	106624	99016	98718	40	202	44	78	276	68	299	67	64	53	57	170
432	105738	105793	99076	99042	54	178	47	53	315	93	304	71	72	26	43	190
433	104938	106060	99248	99332	37	181	51	70	305	74	325	65	63	43	60	156
434	105385	105985	99150	99078	40	160	57	74	299	78	275	63	70	46	47	174
435	105570	105679	98915	99508	42	162	56	74	296	76	285	75	83	35	62	172
436	105522	105790	99124	99211	49	157	48	67	286	78	312	71	77	36	36	151
437	105113	106219	98953	99412	36	188	45	88	277	65	277	73	66	33	57	177
438	105711	105582	98938	99503	44	157	65	48	288	65	281	81	58	44	45	173
439	105031	106637	98830	99258	30	175	60	64	281	78	314	68	69	43	42	185
440	105070	106090	99060	99367	46	201	43	68	277	74	305	62	82	43	51	207
441	105751	105928	98630	99255	49	181	54	60	292	82	275	64	59	47	49	201
442	105635	105565	99105	99357	50	183	57	60	327	71	321	84	81	33	51	180
443	105774	106113	98646	99181	39	181	41	72	289	70	278	87	65	57	55	194
444	105190	105928	98746	99863	48	181	55	65	284	69	288	67	62	42	58	166
445	106139	105900	98908	98793	40	179	56	62	284	68	276	61	76	45	46	169
446	105670	105940	98959	99073	43	169	58	62	301	70	294	68	63	59	53	182
447	105539	106022	98995	99108	51	170	52	79	295	60	275	58	78	43	47	189
448	105673	106090	98867	99045	52	186	49	85	280	67	288	81	83	45	57	200
449	105712	106161	98733	99142	50	193	49	71	278	79	308	72	84	42	56	179
450	105360	105310	99438	99681	46	164	53	84	285	89	291	71	84	43	40	180
451	105527	106153	98884	99319	48	162	41	75	269	69	269	64	71	53	54	191
452	106046	106181	98885	98678	37	191	61	62	286	76	299	56	71	32	53	163
453	105203	106323	98721	99568	37	204	60	80	284	66	310	70	77	46	48	174
454	105276	106125	98664	99727	52	181	62	79	297	91	283	67	73	34	56	177
455	105957	105875	98633	99240	47	176	38	83	269	84	286	73	72	45	33	183
456	105705	106222	98802	99182	47	185	43	69	283	81	317	74	72	37	52	180
457	105661	106143	99082	98856	48	162	47	68	296	73	319	75	83	55	57	176
458	105594	106231	98808	99144	54	170	50	64	346	65	286	78	75	32	53	188
459	105521	105925	98974	99291	49	199	54	66	271	66	302	71	68	41	65	188
460	105473	106230	99017	99120	28	187	50	69	313	75	345	66	64	54	58	180
461	105722	106311	99034	98832	42	182	47	85	291	79	278	79	86	43	56	188
462	105620	106248	99107	98839	38	176	57	59	321	84	294	62	73	49	64	178
463	105780	105997	99208	98666	47	164	49	57	291	69	303	57	65	32	60	176
464	105797	106199	98944	98954	43	164	53	71	270	85	314	63	66	37	43	176
465	105909	105616	98933	99295	46	215	48	83	293	95	270	74	80	49	51	182
466	105877	106211	98739	99048	48	138	41	70	305	84	298	67	82	35	53	163
467	105961	106275	98467	99243	38	164	50	62	309	79	283	55	71	34	55	177
468	105924	105981	98954	99008	39	163	36	68	300	82	294	75	84	33	51	172
469	105905	106677	98419	98790	46	166	44	56	288	89	267	72	73	44	60	166
470	105411	106284	98966	99150	38	193	60	52	290	77	271	71	55	49	49	192
471	106004	106059	98865	98851	39	144	62	64	279	71	322	62	67	36	52	186
472	105410	106207	99039	99154	45	194	40	68	299	73	296	58	60	44	50	163
473	106230	106104	98807	98586	48	181	59	66	293	77	272	69	81	53	61	179
474	105578	106331	99059	98850	41	195	60	68	306	72	289	62	94	45	54	188
475	106060	106087	98745	98860	51	180	70	62	305	66	287	78	68	38	49	159
476	105623	106506	98592	99119	47	171	67	62	257	61	287	61	71	53	48	176
477	105884	106403	98594	98840	39	188	49	57	286	72	280	60	67	47	48	187
478	106171	106304	98560	98815	43	188	55	60	329	79	296	70	80	34	54	189
479	105783	106074	99111	98895	45	152	61	77	268	65	285	63	70	44	52	186
480	106248	105973	98906	98748	42	193	60	56	313	75	297	73	55	35	55	172
481	106095	106279	98472	98991	41	175	49	73	292	78	274	69	73	32	53	168
482	105901	106581	98902	98525	38	170	44	67	299	80	276	73	92	48	62	185
483	105991	106763	98750	98381	52	188	59	61	261	62	295	64	65	54	56	189
484	106197	106900	98433	98379	40	179	50	77	307	63	266	71	75	46	52	176
485	105743	106907	98850	98402	51	159	63	57	291	85	298	43	67	49	42	165
486	106137	106732	98424	98643	49	152	59	64	282	82	282	67	70	48	50	185
487	105917	106433	98807	98682	42	173	60	91	309	73	287	65	57	39	53	195
488	105747	106905	98546	98623	35	167	63	73	304	65	285	68	62	41	41	190
489	105985	106795	98443	98528	49	184	57	61	274	71	283	70	76	44	65	168
490	106168	106629	98429	98598	56	194	60	66	311	89	288	77	80	52	57	209
491	106960	105998	98185	98540	42	170	43	72	268	63	283	65	78	43	51	161
492	105633	106452	98901	98783	38	171	41	66	290	87	334	53	79	35	57	199
493	105788	106557	98962	98389	35	173	56	69	296	90	307	66	81	38	54	183
494	106592	106774	97930	98388	40	141	53	51	310	81	304	78	64	49	55	176
495	106166	106672	98523	98233	54	168	53	62	287	74	319	67	70	40	50	187
496	106119	106139	98888	98493	41	166	49	68	285	71	309	74	84	43	48	185
497	106370	106948	98172	98090	59	173	53	64	332	63	253	78	62	53	56	212
498	106177	106657	98348	98566	40	168	49	48	281	84	309	66	61	37	63	181
499	106552	106738	97769	98776	43	184	61	61	298	62	311	78	69	34	53	201
500	106399	106873	98151	98331	37	168	49	71	274	77	263	71	70	55	50	171

## Sheet: Barski Interspecies
	Ancestral base count				Base change count (ancestral->current)
Position	A	T	C	G	T->A	T->C	T->G	C->A	C->T	C->G	G->A	G->T	G->C	A->T	A->C	A->G
-500	103855	104000	95343	96313	44	329	96	93	448	109	508	104	132	51	72	346
-499	104263	103621	95545	96120	55	374	69	101	441	120	430	90	123	58	91	360
-498	103603	103926	95559	96467	58	335	76	82	428	106	456	99	100	46	82	335
-497	103670	103705	95798	96387	54	326	93	77	429	107	439	85	103	43	78	296
-496	103941	103791	95701	96211	50	351	71	84	476	111	446	85	117	59	86	351
-495	103680	103317	96451	96142	48	311	85	77	446	114	449	74	101	61	83	344
-494	103866	103981	95627	96153	58	303	86	89	455	112	462	92	116	61	70	311
-493	103590	103497	95519	96976	53	330	70	71	435	121	451	84	118	52	79	338
-492	103421	103459	96187	96554	60	314	87	95	429	120	451	87	113	57	85	308
-491	103874	104134	95597	96005	44	348	80	99	479	121	441	95	130	61	90	334
-490	103857	103315	95780	96581	43	337	76	101	438	103	437	92	116	42	73	348
-489	103867	103495	95973	96295	64	357	88	87	461	127	490	74	108	60	87	337
-488	103772	103380	95965	96490	47	320	69	117	446	102	447	96	118	46	78	319
-487	103929	103499	95646	96566	50	316	85	91	428	111	479	88	116	50	91	332
-486	103579	103246	95752	97059	58	320	76	93	447	100	456	89	103	55	70	306
-485	103431	103347	96057	96909	60	349	83	99	463	116	460	90	93	60	79	344
-484	103487	103001	96258	96949	58	331	88	75	424	92	439	98	118	52	85	337
-483	103640	103281	96314	96491	51	339	77	100	443	113	471	89	118	48	71	320
-482	103562	103219	96219	96732	53	388	66	86	444	108	457	96	112	56	85	353
-481	103702	103531	95971	96527	48	338	86	92	447	106	472	88	131	57	83	344
-480	103380	103132	96186	96951	49	332	78	101	476	117	460	100	107	63	80	318
-479	103077	103368	96741	96446	59	358	75	99	461	108	453	97	108	59	81	323
-478	103435	103427	96236	96545	49	309	90	85	444	107	451	104	105	49	90	317
-477	103348	103205	96277	96888	52	335	73	102	482	123	482	119	112	47	80	297
-476	103280	103789	95943	96690	63	328	72	89	437	110	473	108	111	50	90	328
-475	103606	103192	96167	96784	40	345	79	97	434	108	468	97	120	59	76	328
-474	103528	102916	96587	96660	50	359	89	101	432	113	473	98	116	62	82	326
-473	103252	103257	96547	96595	46	313	86	91	473	109	503	86	110	54	82	346
-472	103018	103687	96711	96258	51	330	83	85	429	109	466	86	120	47	83	283
-471	103049	103323	96612	96667	50	328	75	77	483	101	441	77	103	61	76	299
-470	103719	102943	96597	96409	44	305	73	91	482	93	474	89	118	57	81	337
-469	103351	102704	96568	97046	53	325	84	85	442	111	488	101	119	41	65	354
-468	103019	103306	96584	96742	68	315	82	91	441	106	466	117	113	62	67	316
-467	103120	103392	96361	96745	47	363	85	95	450	104	472	104	121	50	86	320
-466	103259	103452	96559	96381	46	348	81	94	481	119	455	81	114	64	88	333
-465	103545	102763	96911	96477	57	362	77	90	479	114	432	90	116	69	108	335
-464	102897	103466	96568	96734	49	325	60	114	387	125	458	95	105	50	70	335
-463	103519	103400	96602	96122	59	332	98	96	441	101	446	102	105	55	71	325
-462	103041	103115	97057	96431	59	353	91	101	433	105	474	94	114	60	88	322
-461	103293	103355	96607	96447	58	346	74	107	456	116	490	104	114	53	67	343
-460	102381	103610	97143	96495	48	322	87	93	471	116	425	103	126	73	82	324
-459	103582	102528	97291	96291	50	331	79	87	445	102	413	90	112	43	79	334
-458	102614	103303	96787	96957	52	350	87	105	541	104	422	93	112	67	71	338
-457	103420	102565	96920	96823	65	350	80	86	427	110	495	80	106	62	94	310
-456	102903	103396	96663	96798	50	323	61	89	417	102	484	84	133	55	94	331
-455	103135	103598	96588	96407	66	353	104	73	425	113	435	75	107	46	68	322
-454	102983	103175	96913	96729	56	342	96	103	457	128	467	67	119	55	82	306
-453	102755	103008	97058	96903	55	358	95	102	422	110	446	100	139	65	71	322
-452	102768	103661	96610	96648	49	332	102	93	480	110	463	87	118	62	72	344
-451	103052	103132	96643	96864	69	356	68	89	454	104	450	90	137	46	93	332
-450	102596	103328	96957	96902	60	347	77	96	441	100	494	79	129	59	83	337
-449	102715	103139	97406	96509	61	354	84	101	492	93	432	75	129	63	84	336
-448	103041	103326	96801	96584	63	328	67	101	420	119	462	93	117	59	78	304
-447	102727	103304	96986	96687	40	324	76	99	475	118	434	91	96	48	64	349
-446	103258	102992	96611	96907	54	324	68	109	443	118	480	84	134	54	78	335
-445	103193	103172	96739	96575	52	326	69	91	455	101	438	93	118	61	74	335
-444	102638	103397	96671	97112	62	344	69	92	428	110	433	86	105	49	69	324
-443	102837	102686	96772	97457	44	322	82	88	455	110	411	103	109	45	95	315
-442	103453	103163	96470	96650	49	316	64	87	453	111	459	94	110	45	74	334
-441	103079	102805	96899	96989	49	316	75	98	471	115	456	108	102	58	97	314
-440	103165	103214	96660	96753	65	317	83	101	500	119	445	95	129	49	94	362
-439	102800	103317	96894	96751	56	335	67	87	430	113	476	79	123	52	78	311
-438	103260	102945	96629	97003	43	344	85	99	445	83	479	89	116	61	93	316
-437	103150	102825	97107	96695	54	323	73	73	469	119	434	88	119	58	77	324
-436	103140	103150	96863	96615	62	328	81	97	439	108	460	88	112	51	90	296
-435	103377	102438	96949	96960	50	317	73	88	460	130	469	98	127	52	67	325
-434	102791	102490	97198	97277	61	347	73	92	451	112	470	83	104	47	74	332
-433	103032	102958	97085	96737	52	344	93	84	490	119	468	92	113	60	74	326
-432	103392	102904	96732	96815	50	350	76	103	441	111	473	101	116	60	76	357
-431	103144	102985	97097	96596	56	309	79	88	456	110	417	80	102	62	67	342
-430	103132	102843	96926	96910	60	353	84	99	445	124	469	75	114	49	58	330
-429	102809	102616	97372	96983	66	338	74	91	469	96	443	82	101	56	75	323
-428	102984	102857	97314	96683	60	309	82	91	423	102	473	85	108	61	86	335
-427	102900	102795	97069	97060	51	302	67	107	515	119	433	83	128	58	75	314
-426	103122	103193	96663	96874	47	350	86	73	411	139	458	86	122	40	74	327
-425	102778	102675	97203	97263	66	334	92	82	461	124	454	95	118	68	83	269
-424	103173	102915	96969	96915	59	331	108	76	477	112	462	97	91	64	84	339
-423	103133	102938	96801	97106	46	288	57	109	413	117	478	87	107	49	64	346
-422	103342	103240	96841	96592	75	346	96	103	445	102	491	113	125	54	97	313
-421	103041	102784	97395	96707	42	336	67	94	459	123	449	90	107	59	85	314
-420	102668	102806	97712	96778	47	326	87	91	452	116	482	93	114	50	75	325
-419	103276	103334	96538	96825	49	328	71	95	476	116	461	87	128	51	86	348
-418	103394	102857	96944	96820	64	332	70	119	457	110	439	89	101	66	103	319
-417	103207	102440	97185	97162	53	341	80	99	446	126	464	83	115	50	99	335
-416	102886	102942	97323	96857	62	348	78	118	446	109	467	93	114	51	83	338
-415	103040	103016	97289	96662	51	338	71	96	492	107	474	90	99	50	84	331
-414	102731	102936	97159	97141	59	313	75	84	451	129	476	95	130	41	96	323
-413	103298	103015	96992	96667	57	304	93	90	452	121	477	105	120	43	80	342
-412	103584	103072	96778	96577	61	326	75	107	458	128	417	102	118	51	77	335
-411	103439	103387	96295	96891	47	328	102	86	460	123	460	80	126	60	94	305
-410	103205	102644	96567	97552	55	300	79	96	459	123	445	85	116	60	74	322
-409	103771	102381	97337	96528	49	331	78	75	467	102	435	83	104	49	63	331
-408	103868	103052	96737	96304	53	298	63	81	481	106	461	86	105	49	104	338
-407	103257	103008	96407	97262	49	326	85	93	457	112	434	88	129	51	86	304
-406	102628	102633	96829	97869	62	337	80	87	457	110	498	88	110	51	94	306
-405	103322	103055	97152	96409	60	321	74	98	466	101	485	97	123	39	76	305
-404	102980	102728	97322	97017	51	322	85	93	479	94	443	90	103	58	81	332
-403	103113	102936	97357	96631	56	332	65	96	440	103	482	107	107	63	72	315
-402	103407	102686	97166	96840	55	348	76	77	443	107	485	85	122	61	76	362
-401	103587	102873	96668	97000	59	331	77	79	457	106	450	94	132	47	77	327
-400	103143	102955	97000	97077	53	357	81	100	434	108	494	86	121	41	70	318
-399	103478	102516	97128	97179	58	344	72	93	444	118	443	80	103	51	76	332
-398	103167	103464	96986	96620	61	359	73	81	479	120	456	96	128	58	66	317
-397	102668	103113	96923	97509	55	344	69	100	414	115	460	76	117	61	87	324
-396	103395	102905	96786	97194	66	327	78	93	413	126	478	86	115	53	91	344
-395	103070	103245	96982	96989	63	325	82	93	437	102	451	106	116	48	100	331
-394	103315	103012	96914	97067	54	342	84	69	481	120	473	85	114	59	80	301
-393	103506	103018	97105	96766	56	338	91	98	450	124	423	72	111	57	67	329
-392	104027	103232	96456	96725	58	333	76	94	460	109	480	91	105	52	77	309
-391	103676	103114	96795	96896	52	315	81	88	467	97	423	90	127	58	82	313
-390	103195	103260	97028	96995	56	316	78	91	441	110	443	83	104	52	80	352
-389	103636	103039	96537	97247	56	341	85	85	471	95	410	84	129	58	89	351
-388	103579	102683	97349	96833	59	322	80	89	436	100	464	86	124	63	74	349
-387	103291	103048	96632	97461	41	305	78	100	455	94	440	97	113	49	68	350
-386	103580	102878	96432	97577	57	303	88	98	464	117	466	97	126	60	81	333
-385	103370	102839	97128	97159	58	338	75	79	473	113	461	81	122	54	74	325
-384	103710	102862	96799	97138	60	316	59	72	444	137	444	104	110	60	74	336
-383	103415	103207	96890	96953	56	336	76	101	432	104	452	86	95	48	95	294
-382	103964	102798	97153	96679	45	316	94	94	466	112	467	88	104	53	90	296
-381	104197	102692	96819	96852	56	342	90	107	457	96	472	76	109	58	83	320
-380	103753	102758	96841	97177	63	346	70	84	458	107	446	110	102	40	95	347
-379	103864	102272	97270	97179	46	292	71	108	456	114	460	105	109	58	71	323
-378	103804	102849	96868	97111	49	334	81	94	442	109	513	91	126	60	72	334
-377	103635	102969	96715	97355	60	310	78	109	485	106	488	94	105	58	87	329
-376	102743	102971	97478	97502	53	327	88	102	473	141	521	93	102	48	81	318
-375	103379	103001	96831	97578	45	336	95	101	477	100	463	96	104	49	64	304
-374	103331	103236	96904	97280	46	354	93	90	484	100	446	95	107	47	83	332
-373	103805	102608	97372	96933	58	307	77	115	448	125	444	98	107	68	100	326
-372	103806	103187	97170	96682	63	338	88	100	468	127	419	82	97	54	89	326
-371	103648	103415	96518	97230	41	323	77	79	455	107	454	93	127	59	81	320
-370	103441	103375	96765	97260	54	376	81	91	458	104	448	101	111	61	86	330
-369	103620	102389	97479	97355	47	341	92	96	458	119	447	72	110	48	72	291
-368	103794	102932	96860	97320	44	303	65	102	450	100	466	82	109	53	93	332
-367	103925	102768	96845	97340	47	325	79	95	444	114	438	94	106	69	93	310
-366	103935	102582	97207	97159	56	307	60	99	450	101	427	97	107	64	64	321
-365	104021	102728	96942	97144	55	343	93	99	467	110	496	108	113	59	71	316
-364	103620	102922	96883	97371	53	323	83	85	435	118	431	85	112	57	91	352
-363	103566	103229	96747	97323	63	316	78	112	448	126	489	100	114	66	70	303
-362	103819	102743	97226	97094	41	332	99	66	507	99	509	99	97	48	80	317
-361	104264	103055	96349	97193	36	334	79	101	452	123	443	91	121	57	88	306
-360	103868	102949	96634	97407	70	351	89	132	446	117	441	83	116	58	80	333
-359	104028	102692	96486	97690	67	322	81	84	456	109	440	92	97	52	81	331
-358	103658	102854	97158	97242	54	322	77	97	459	98	463	104	103	65	86	323
-357	104146	102455	97091	97191	53	297	95	97	443	101	441	96	101	77	77	326
-356	103982	102246	97042	97684	51	320	78	83	477	127	446	117	118	59	76	341
-355	104328	102862	96661	97079	59	349	78	108	435	120	463	89	108	44	81	322
-354	103333	102995	97312	97347	48	309	88	92	450	129	494	106	95	67	86	290
-353	104261	102537	96966	97257	55	303	78	86	474	95	449	89	97	54	84	324
-352	104087	102797	96865	97253	46	339	67	98	462	108	443	100	108	55	69	305
-351	103500	102975	97081	97511	58	326	73	74	442	111	477	96	129	45	101	341
-350	103689	102901	96944	97559	52	330	85	91	445	107	459	90	116	50	73	349
-349	104217	102961	96777	97132	46	315	57	78	444	129	460	110	113	57	79	325
-348	103933	102633	97131	97373	42	335	73	87	454	123	437	89	106	60	76	330
-347	103416	103238	97045	97424	63	304	81	94	443	115	469	97	112	51	82	333
-346	104085	102675	97051	97229	62	309	85	84	414	98	472	112	96	60	77	331
-345	104365	102606	96943	97097	51	330	88	91	448	102	423	99	103	52	86	331
-344	103892	102485	96896	97810	62	321	94	95	475	130	451	105	122	54	84	298
-343	103548	103240	96867	97384	53	322	76	77	453	108	475	81	123	48	87	321
-342	103683	102952	97350	97073	51	353	78	83	434	98	495	94	102	54	80	321
-341	104040	103022	97045	97023	60	342	80	106	462	110	481	102	118	51	86	331
-340	103863	103015	96514	97820	51	331	87	86	462	115	455	89	117	49	81	323
-339	103900	102740	97551	96977	51	332	73	101	449	101	431	76	111	53	85	312
-338	103937	103168	96925	97165	54	291	86	92	418	117	455	89	98	48	89	317
-337	104122	102642	97162	97282	54	310	86	103	477	106	463	79	114	46	83	356
-336	104218	102871	96980	97117	56	318	73	90	457	138	456	95	126	62	66	323
-335	104026	102493	97643	97004	45	316	75	96	488	95	495	96	108	69	94	331
-334	104287	102592	96860	97522	57	321	85	99	439	111	478	103	126	61	80	301
-333	103999	102316	97070	97845	52	335	74	87	459	111	467	89	112	40	61	346
-332	103945	102602	97008	97688	47	337	77	92	444	113	461	91	107	46	91	315
-331	103584	102767	97213	97679	45	308	75	94	470	103	448	94	101	52	81	312
-330	104137	102652	97050	97408	49	333	87	83	481	117	465	88	108	42	88	347
-329	103969	102719	97100	97440	51	307	75	100	476	110	448	97	100	50	79	361
-328	103570	102778	97238	97703	60	343	86	111	447	99	421	92	106	53	66	346
-327	104281	102710	97069	97185	42	312	82	90	427	116	454	89	117	54	90	356
-326	103392	102520	97787	97512	62	310	70	84	451	110	461	98	109	61	72	349
-325	103842	103066	97314	97059	52	329	85	79	452	112	437	85	129	60	72	354
-324	103875	102833	96871	97697	51	319	84	87	477	97	504	89	99	73	77	326
-323	104062	102411	97263	97502	48	339	63	83	424	94	468	91	120	70	104	315
-322	103760	102637	97345	97511	59	310	67	97	423	119	458	101	94	50	86	331
-321	103788	102959	97069	97487	57	374	92	97	451	112	447	100	124	53	83	295
-320	104153	102228	97286	97628	64	311	76	91	480	101	433	66	105	45	80	328
-319	103883	102812	97015	97596	58	337	76	74	444	110	446	104	115	48	92	319
-318	103927	102677	97522	97157	47	296	80	82	453	109	480	91	120	62	86	353
-317	103743	103234	97110	97169	55	313	87	118	463	125	465	103	101	52	73	324
-316	104078	103165	96786	97233	55	332	84	67	445	113	443	96	103	55	82	341
-315	104102	102138	97226	97821	55	335	76	96	467	151	484	62	115	52	75	352
-314	103132	102783	97204	98121	55	332	72	102	433	115	491	97	155	44	93	314
-313	103494	102809	97615	97374	62	335	77	82	431	129	460	82	131	38	88	299
-312	103698	102400	97313	97863	59	313	75	96	455	119	454	96	113	47	84	335
-311	103880	102258	97542	97612	52	342	84	94	455	107	501	101	116	49	91	285
-310	103913	102927	97133	97351	48	322	82	98	443	101	474	74	134	48	82	339
-309	103825	102639	97539	97348	74	352	77	96	415	109	471	91	113	51	85	318
-308	104076	102039	97550	97650	49	305	72	94	405	110	472	100	111	54	84	340
-307	103748	102782	97140	97685	53	340	77	92	432	108	443	94	112	57	84	297
-306	103453	102776	96970	98159	54	310	79	82	441	114	473	80	119	51	85	312
-305	103410	102725	97627	97600	49	311	69	81	439	101	450	108	110	61	90	306
-304	103510	103293	96619	97938	51	342	71	94	479	129	472	74	119	50	79	344
-303	103376	102402	97789	97771	52	331	70	97	483	112	462	88	96	53	76	346
-302	103604	102606	97494	97741	67	346	75	101	474	101	418	77	117	49	68	337
-301	103942	102734	97394	97364	56	325	68	101	463	111	465	86	124	56	77	365
-300	103446	102776	97644	97523	47	320	82	80	437	106	474	88	91	62	71	340
-299	103855	102600	97554	97396	46	367	68	80	447	99	437	88	121	54	76	337
-298	103309	102742	97833	97586	50	302	92	89	454	115	478	87	122	47	78	322
-297	103387	102691	97519	97847	59	370	84	85	427	108	452	87	103	56	74	354
-296	103806	102691	97592	97348	52	299	84	83	431	133	425	99	118	61	78	337
-295	103594	102934	97910	97099	51	345	85	96	457	97	436	91	105	53	72	336
-294	103495	102266	98084	97631	51	308	82	93	435	120	459	91	116	67	69	330
-293	103778	102942	97007	97804	59	336	91	98	429	114	455	100	92	48	90	327
-292	103159	102475	98087	97749	46	327	81	97	447	122	464	109	100	56	76	306
-291	103480	103435	97202	97403	44	336	58	82	429	101	453	88	132	68	85	327
-290	103403	102967	97498	97594	50	338	82	98	483	111	443	103	98	54	82	342
-289	103629	102521	97612	97702	53	320	85	103	478	111	431	104	116	52	71	322
-288	103307	102677	98205	97276	43	316	79	89	428	111	462	95	111	55	96	323
-287	103527	102682	97688	97577	48	281	91	97	468	108	459	95	111	60	83	337
-286	103366	103012	97348	97766	49	313	86	106	433	125	433	87	123	61	86	325
-285	103233	102622	98119	97562	54	296	84	89	461	119	469	84	110	50	74	339
-284	102932	102623	97692	98192	56	346	75	88	441	120	455	99	105	59	82	328
-283	103117	102852	97711	97750	38	334	65	87	470	96	445	112	101	52	80	336
-282	103347	102626	97852	97639	58	354	75	100	458	109	473	107	112	55	84	338
-281	103572	103007	97428	97391	54	312	78	94	423	113	465	99	124	41	89	322
-280	103645	102111	97784	97899	50	322	94	79	454	110	485	107	125	59	75	309
-279	103436	102870	97438	97761	52	350	85	99	470	122	433	109	124	60	86	323
-278	103721	102591	97335	97850	53	353	86	99	428	109	476	102	108	56	75	313
-277	103027	102833	97500	98064	46	326	104	85	466	100	453	85	114	50	75	305
-276	103314	102478	97871	97829	60	339	85	93	458	100	467	105	109	59	86	335
-275	103392	102684	97771	97644	51	362	95	114	445	133	449	94	93	61	69	337
-274	103727	101917	97458	98346	58	304	83	98	443	101	492	107	133	57	80	330
-273	103098	102449	97856	98067	48	293	67	79	415	112	468	87	119	53	90	333
-272	103151	102475	97918	97907	50	312	77	71	450	108	456	71	115	55	67	288
-271	103276	102612	97346	98242	53	359	82	90	452	115	446	104	119	54	97	365
-270	103019	102943	97820	97715	54	361	70	82	474	111	447	102	118	60	83	349
-269	103627	102579	97653	97591	48	365	92	99	441	114	478	88	124	49	67	318
-268	103599	102274	97779	97796	50	345	75	85	427	124	448	116	123	55	80	342
-267	103479	101979	97768	98227	70	299	71	93	446	135	480	77	123	52	88	325
-266	103277	102328	97653	98275	50	352	86	80	426	132	495	81	120	47	76	326
-265	103501	102544	97150	98349	55	334	90	88	450	112	454	85	120	50	75	338
-264	103180	102856	97451	98163	52	356	92	92	421	116	438	80	113	42	68	344
-263	103134	102383	98237	97877	54	296	88	84	487	112	481	87	125	61	91	347
-262	103154	102561	98337	97538	59	346	95	91	434	116	446	83	123	47	72	349
-261	102773	102220	98367	98285	57	326	81	103	466	132	455	73	118	49	89	346
-260	103431	102490	97871	97824	59	304	81	91	436	121	452	83	119	48	74	297
-259	103073	102415	97716	98480	75	337	67	92	458	122	462	87	119	59	83	317
-258	102781	102565	98111	98159	54	331	74	106	440	110	459	74	106	59	83	349
-257	103095	102416	97786	98302	46	303	92	100	452	112	451	84	117	56	82	302
-256	103040	102440	97578	98597	54	326	89	79	406	114	456	92	102	52	110	343
-255	102969	102905	97819	97983	52	346	90	100	448	131	479	89	133	45	83	343
-254	103421	103148	97199	97839	53	335	73	80	458	93	412	99	130	50	77	324
-253	102787	102402	97955	98489	49	317	89	112	456	123	443	107	134	50	90	339
-252	103163	102502	97438	98469	57	320	87	92	456	117	429	87	112	54	81	318
-251	103169	102164	98189	98044	51	328	81	88	477	107	461	76	122	60	84	319
-250	103584	102360	97381	98260	49	321	76	96	464	129	442	87	129	59	87	324
-249	103332	102389	97072	98811	67	320	72	97	490	103	443	97	111	51	83	297
-248	103688	101636	97484	98741	58	297	81	89	436	128	488	84	108	48	79	360
-247	103488	102099	97946	98105	55	326	80	111	464	114	454	80	108	51	80	313
-246	103315	102136	97400	98776	50	349	78	77	417	109	437	106	103	56	89	334
-245	102772	102424	98216	98198	43	320	93	105	463	122	466	115	134	52	81	336
-244	103125	102721	97450	98301	59	342	101	78	472	123	420	100	105	62	89	347
-243	102973	102340	97838	98463	54	350	86	91	447	118	476	108	115	44	82	295
-242	103093	102128	97822	98556	37	313	65	105	461	113	489	88	106	53	89	343
-241	103646	101965	97674	98367	37	337	93	90	457	128	469	86	118	57	76	314
-240	103526	101994	97744	98366	65	352	93	95	472	114	473	98	134	52	75	330
-239	103149	102452	97178	98907	48	299	72	83	440	118	454	81	117	51	79	343
-238	103055	102496	97638	98513	58	317	87	101	452	117	474	102	117	53	74	342
-237	102970	102114	97466	99090	52	342	95	96	471	108	489	90	106	67	65	351
-236	103321	101971	97355	98986	57	329	68	90	436	129	436	82	105	47	90	308
-235	104110	102125	97106	98272	60	316	82	93	410	119	443	96	119	51	107	315
-234	102609	102333	97736	98990	50	342	83	77	462	125	469	101	123	51	81	333
-233	103321	102042	97748	98492	49	307	74	96	444	116	432	86	105	42	82	338
-232	103009	102396	96983	99324	77	337	65	83	478	96	461	96	98	54	82	310
-231	103239	102449	97589	98573	41	335	56	88	452	110	458	84	114	53	83	351
-230	103379	101954	97575	98921	57	294	79	86	458	134	449	93	125	60	72	320
-229	102984	102631	97623	98629	48	327	79	97	430	103	468	94	106	56	93	327
-228	103095	102341	97606	98833	38	331	77	74	455	102	476	103	117	36	78	334
-227	102700	102299	98053	98750	53	354	72	84	431	113	426	111	151	60	81	358
-226	103318	101986	97766	98834	45	335	84	88	465	121	464	97	130	51	82	337
-225	103223	102594	97514	98632	75	339	71	88	461	109	446	104	102	47	76	343
-224	102625	102288	97459	99593	56	328	88	105	426	115	466	72	99	52	91	308
-223	102821	102094	98277	98755	47	316	74	95	447	113	483	92	135	44	78	333
-222	103040	102230	98106	98577	56	316	59	82	412	107	438	88	107	65	83	318
-221	103324	101985	98135	98497	57	349	79	94	465	88	444	96	124	59	80	324
-220	102990	102077	97455	99405	50	322	84	89	409	128	433	92	116	72	69	352
-219	102822	101961	98407	98804	56	304	76	112	442	112	455	96	109	65	93	324
-218	103566	102515	97237	98728	60	362	78	97	477	108	445	103	121	60	96	313
-217	102986	102125	97998	98907	58	312	85	82	409	102	457	75	115	47	91	350
-216	102998	101847	97931	99214	50	296	95	104	438	125	472	97	109	49	69	326
-215	103500	102304	97379	98899	44	326	87	98	446	116	476	111	141	65	78	304
-214	103039	101935	97819	99238	48	341	77	87	404	121	423	77	103	50	89	356
-213	103369	102319	97516	98873	45	330	67	99	482	134	482	76	117	60	88	351
-212	102860	102095	98044	99099	52	317	86	87	433	107	394	87	126	47	83	343
-211	103044	102240	98285	98481	61	317	87	90	430	113	499	88	135	63	75	322
-210	103009	101657	98505	98886	50	306	76	89	429	117	432	91	117	60	71	355
-209	103043	102266	97734	99034	47	332	77	95	393	108	461	106	127	49	70	356
-208	103354	101586	98814	98347	47	332	80	104	474	97	425	95	105	51	63	324
-207	102808	102579	97728	98914	61	327	84	93	423	133	458	96	112	54	83	322
-206	103088	102046	97746	99143	60	360	81	94	434	117	475	108	109	43	73	335
-205	102871	102268	97881	98961	69	327	70	80	414	112	457	109	107	56	77	352
-204	102950	102456	98085	98508	47	343	65	82	424	101	462	94	98	47	72	364
-203	102630	102542	98390	98513	50	312	75	90	467	120	453	94	121	56	64	335
-202	102717	102670	98039	98678	50	294	93	104	446	100	493	105	89	53	88	318
-201	103507	102212	98163	98270	46	347	79	91	415	114	448	100	122	55	107	311
-200	102813	102653	97997	98576	50	314	67	79	445	137	464	79	105	57	91	328
-199	102706	102492	98229	98671	62	306	76	92	394	109	450	103	120	39	71	331
-198	103132	102475	98369	98151	38	340	82	95	443	116	427	92	106	56	85	297
-197	102969	102492	98020	98734	60	320	72	75	451	106	493	88	126	49	94	329
-196	102989	102431	97833	98985	56	324	80	75	418	113	467	90	113	55	77	349
-195	103044	102276	98471	98380	50	334	72	84	453	121	488	106	96	51	82	329
-194	103510	102126	98569	97975	54	339	76	107	420	110	442	94	97	60	70	315
-193	103042	102689	98275	98172	48	331	79	95	445	114	472	100	108	52	90	318
-192	103133	102722	98247	98063	67	325	81	91	452	107	443	96	136	46	79	347
-191	102696	102705	98434	98361	56	311	76	85	419	134	438	84	105	64	89	320
-190	103096	102787	97860	98403	48	327	81	98	409	114	440	90	111	51	60	324
-189	102988	102311	98465	98384	51	345	86	89	450	122	480	96	118	53	81	308
-188	103130	102983	98561	97531	52	318	75	92	435	92	447	79	107	53	75	329
-187	102968	102886	98564	97808	51	321	97	95	409	101	432	90	119	37	85	340
-186	103095	103174	97804	98147	53	332	85	90	424	131	379	105	117	53	76	340
-185	103136	102544	98126	98364	47	347	71	88	409	92	488	100	106	49	82	350
-184	103545	102887	97603	98128	54	355	76	111	424	104	459	84	103	70	70	311
-183	102624	102622	98484	98537	70	323	72	100	469	110	453	105	112	44	69	361
-182	103210	102972	98517	97570	57	329	94	122	427	109	440	100	98	56	85	319
-181	103781	102791	98390	97363	72	328	71	73	445	101	384	103	123	64	83	344
-180	103355	103169	98249	97523	40	326	92	95	424	120	475	101	107	52	58	319
-179	103332	103078	98164	97661	45	309	76	104	447	133	435	94	109	60	76	326
-178	103235	103413	98062	97583	61	321	76	90	431	117	436	100	118	58	80	352
-177	103197	102909	98392	97761	53	330	79	84	420	120	452	112	120	50	80	338
-176	103691	103121	98049	97386	59	321	82	111	440	112	452	95	102	60	101	336
-175	103250	103229	98415	97320	73	325	79	78	463	120	434	99	109	49	91	317
-174	103627	103332	98398	96948	58	307	79	106	447	102	465	100	114	59	78	321
-173	103535	103688	98004	97059	61	331	93	77	419	130	425	100	104	68	90	329
-172	103424	102912	98929	96995	54	307	84	84	442	105	439	80	112	50	70	343
-171	103529	103662	98442	96612	54	339	67	79	450	119	408	91	100	51	68	321
-170	103058	103261	98662	97348	48	325	82	86	458	114	433	97	127	55	89	337
-169	103136	103387	98729	97023	49	361	73	93	482	101	417	97	111	57	76	322
-168	103349	103461	98641	96799	50	312	82	104	433	110	450	67	117	60	68	311
-167	103749	103405	98128	96986	42	324	75	98	453	121	426	99	119	64	83	305
-166	103376	103585	97852	97417	67	322	62	97	400	104	460	102	135	52	81	325
-165	103600	104037	97935	96615	54	319	83	77	483	120	434	88	121	54	90	343
-164	103550	103995	97873	96780	50	336	90	95	428	116	432	89	98	53	78	335
-163	103761	103634	97917	96837	40	324	91	71	448	121	443	90	113	56	83	320
-162	104581	103536	97952	96174	66	320	82	95	431	114	454	97	107	44	80	326
-161	103928	103851	98092	96335	42	331	86	95	489	116	406	106	119	60	86	353
-160	103963	103892	97881	96440	39	318	81	98	431	116	434	87	128	54	85	365
-159	104010	103886	98282	96015	50	288	91	81	421	110	416	103	120	52	77	358
-158	104211	103873	97420	96748	57	328	72	83	426	119	422	72	135	54	75	333
-157	104371	103578	97749	96524	59	306	89	90	446	109	482	83	118	61	93	312
-156	104063	104125	97794	96251	52	304	95	82	434	111	463	95	104	47	88	346
-155	104068	104131	97719	96378	53	302	83	85	420	101	424	81	114	66	87	361
-154	104845	104241	97099	96084	53	330	80	77	399	118	406	84	137	61	90	291
-153	103765	104228	97803	96494	56	290	74	94	388	116	467	112	90	37	94	291
-152	104270	104183	97935	95873	60	323	68	90	462	103	424	92	119	39	87	325
-151	104333	103995	97578	96342	39	321	63	95	410	126	414	102	115	38	82	317
-150	104408	104184	97487	96164	45	348	74	84	444	99	404	85	118	56	64	314
-149	104611	104406	97112	96074	63	344	70	77	433	109	381	89	108	63	83	305
-148	104178	104216	97400	96446	50	311	76	92	422	123	465	106	100	48	83	321
-147	104492	105072	97004	95662	54	323	79	80	436	105	453	88	111	50	96	319
-146	104482	104016	97334	96501	60	329	83	102	418	111	448	102	104	57	84	309
-145	104909	104088	97615	95707	48	302	83	84	409	104	431	98	90	43	87	335
-144	104819	104242	97072	96214	51	319	82	89	454	107	465	89	123	61	91	318
-143	104900	104695	96830	95947	46	321	94	105	397	113	480	88	112	48	78	321
-142	104990	104408	97040	95934	55	294	87	94	415	114	447	102	101	54	105	292
-141	104947	104237	97033	96189	42	312	77	84	429	92	409	95	112	71	70	324
-140	105173	104479	97151	95634	55	304	73	86	446	122	449	93	113	55	85	322
-139	105305	104151	97107	95788	58	321	79	93	471	109	412	94	101	50	82	311
-138	104871	104372	97439	95707	53	308	75	87	439	99	463	103	111	59	100	301
-137	105525	104420	96445	96037	69	329	84	102	423	127	452	112	100	59	80	297
-136	105563	104336	96677	95829	49	301	72	85	459	119	455	81	120	60	87	343
-135	105380	104439	96636	95949	59	334	86	106	456	110	427	80	110	43	74	337
-134	105257	104231	96707	96173	55	322	95	78	446	118	420	92	132	56	65	306
-133	105746	104325	96712	95529	49	323	92	90	421	112	393	98	92	61	82	324
-132	105902	104706	96099	95638	52	315	85	81	409	105	443	91	115	59	73	320
-131	105898	104198	95842	96367	52	284	87	95	399	101	442	100	125	62	89	323
-130	105522	103917	96232	96688	55	294	69	87	426	115	456	98	116	58	78	313
-129	106111	103757	96124	96380	60	337	78	93	457	108	487	100	109	63	66	291
-128	105782	104218	96103	96294	46	322	74	82	448	98	431	82	97	56	76	302
-127	106251	104190	95677	96245	49	322	82	105	402	100	440	87	94	45	89	314
-126	106067	103993	96028	96313	50	318	68	90	457	122	435	93	106	62	82	316
-125	106004	104204	96291	95919	45	292	68	107	454	118	436	94	111	55	56	332
-124	106466	103573	96041	96320	70	361	81	106	442	103	412	93	110	59	75	312
-123	106081	103950	95818	96515	54	312	64	83	416	111	453	101	102	74	95	313
-122	106458	104140	95363	96454	57	315	77	88	419	113	446	103	96	65	100	316
-121	106977	103407	95158	96896	56	320	88	90	406	120	453	101	114	41	87	352
-120	106150	104018	95682	96542	60	344	79	89	384	117	389	63	123	54	76	317
-119	107151	103361	95281	96571	63	290	67	106	424	107	412	90	122	68	97	300
-118	106564	103525	95297	97009	63	328	78	101	414	108	473	96	103	43	77	350
-117	106878	103755	95519	96289	56	309	92	89	448	105	397	92	108	56	95	331
-116	106203	103837	95264	97111	43	285	68	102	446	113	443	94	118	61	84	357
-115	107381	103092	95092	96849	47	290	83	90	410	104	458	91	117	46	74	336
-114	106846	103705	95104	96873	55	322	76	100	417	117	442	93	116	65	87	356
-113	106617	103686	94989	97283	43	300	85	108	398	107	436	78	101	50	86	320
-112	106964	103779	94724	97076	54	327	89	98	426	109	449	82	124	59	76	317
-111	107323	103110	95061	97034	49	307	63	77	403	111	418	80	120	49	74	316
-110	107091	103742	94172	97580	55	321	70	98	444	98	433	103	98	64	73	327
-109	107370	102820	94278	98101	52	301	87	99	421	107	451	101	112	56	73	324
-108	107728	102957	94575	97375	43	337	80	94	431	127	419	91	120	56	80	351
-107	107188	103147	94874	97453	46	311	82	109	437	106	474	98	100	61	76	291
-106	107225	103372	94490	97600	71	336	79	86	435	102	428	78	105	58	95	349
-105	107444	102819	95103	97344	59	304	84	83	416	115	444	79	116	58	72	303
-104	107504	103321	94623	97273	57	310	77	88	416	118	443	92	114	50	84	341
-103	107651	102927	94294	97907	52	330	82	94	444	121	436	95	108	54	81	329
-102	107727	102382	94932	97714	55	335	69	98	448	104	460	92	131	48	97	295
-101	107411	103151	94123	98090	42	325	77	88	421	114	474	98	117	64	79	323
-100	108281	101972	94231	98365	54	288	99	95	459	110	426	90	105	71	86	320
-99	107821	102597	94291	98143	45	325	84	87	429	118	467	100	112	52	94	328
-98	107974	102963	93664	98249	68	312	82	81	391	103	473	104	125	53	62	327
-97	107424	102462	94088	98885	57	302	75	100	428	120	450	104	136	58	73	307
-96	107888	102026	93843	99071	58	333	60	99	429	84	450	89	114	50	73	317
-95	108528	102172	93796	98398	54	318	72	87	433	127	425	100	117	52	89	356
-94	107937	101836	94001	99200	69	342	83	97	435	110	452	75	116	60	68	314
-93	108471	101709	93564	99187	63	307	81	94	413	111	476	86	103	55	75	323
-92	108179	101345	93744	99643	65	321	72	85	404	105	457	92	108	53	68	308
-91	108726	101795	93321	99060	51	300	73	97	438	116	436	99	110	58	90	306
-90	108063	101773	93005	100103	59	300	64	85	468	120	425	112	113	65	91	332
-89	108274	101104	93029	100496	63	281	79	97	451	106	462	96	107	48	69	343
-88	108255	100899	93477	100341	58	271	71	88	410	123	457	94	101	47	92	318
-87	108267	100909	93134	100693	73	285	80	82	477	104	459	92	122	58	102	325
-86	108095	100806	92951	101130	67	301	86	92	423	100	509	89	119	48	74	323
-85	108588	100459	93038	100911	60	311	70	75	427	119	441	90	109	49	77	336
-84	108112	100516	93306	101083	61	342	78	98	471	119	488	88	107	51	74	335
-83	107854	100252	93112	101797	45	340	73	100	415	96	394	94	101	60	77	315
-82	107768	99918	93014	102397	59	309	89	108	426	105	445	101	116	59	83	334
-81	108470	99410	93065	102166	45	324	72	102	416	111	479	114	131	60	68	357
-80	108900	99357	93248	101699	65	335	88	85	378	92	457	95	121	50	77	351
-79	108472	99117	92774	102831	57	280	86	98	419	99	482	102	113	39	73	333
-78	108259	98762	92785	103404	46	292	97	102	414	115	486	90	129	51	70	338
-77	108006	98655	92617	103939	57	317	90	92	443	114	488	86	128	60	78	350
-76	107664	98651	93202	103751	44	311	72	97	473	125	488	105	149	58	81	319
-75	108457	98032	92745	104000	40	322	78	106	434	105	479	93	124	44	68	315
-74	108401	97769	92740	104478	49	324	84	110	416	106	442	93	108	53	93	330
-73	107647	97212	93117	105457	51	280	88	86	446	110	476	81	109	64	70	351
-72	107853	97178	93132	105224	59	286	79	90	435	122	428	104	129	44	63	314
-71	107508	96327	93888	105653	57	325	94	102	430	122	468	97	134	58	82	347
-70	107943	96333	94009	105117	58	346	83	100	454	127	498	101	122	55	72	316
-69	107446	96309	93670	106025	48	343	78	76	438	105	507	107	121	52	83	324
-68	107187	95603	93935	106729	54	317	76	104	454	106	489	97	129	59	82	326
-67	106458	95714	94136	107173	47	329	90	64	441	101	508	99	135	49	70	362
-66	106575	95683	94237	106989	51	312	91	85	409	113	498	92	120	57	74	354
-65	106179	95315	95239	106850	40	332	74	86	426	126	473	98	107	45	75	315
-64	106529	95195	94675	107152	47	326	91	85	424	117	453	91	117	59	75	345
-63	106235	94597	95293	107464	43	297	70	90	418	107	481	93	125	45	90	306
-62	105913	94121	95182	108399	61	325	74	77	458	132	488	101	106	45	105	321
-61	105435	93924	95829	108455	48	335	86	90	427	142	510	81	114	48	76	366
-60	105496	94011	96082	108025	43	317	74	93	422	117	496	98	121	60	73	354
-59	105738	93808	96175	107979	55	302	72	87	449	106	502	88	120	51	94	333
-58	104865	94239	96252	108315	56	335	67	98	397	128	518	109	134	47	80	348
-57	104830	93349	96525	109023	38	320	84	82	452	113	505	98	100	41	72	355
-56	104383	93271	96970	109133	37	334	81	108	430	107	505	96	118	54	70	348
-55	104149	92852	97444	109314	48	310	69	98	428	131	437	96	127	50	86	315
-54	104500	92294	97597	109378	46	314	77	103	453	99	493	102	125	55	85	349
-53	104384	92775	96977	109648	48	300	82	86	416	126	546	102	116	39	100	322
-52	103718	92351	97686	110040	41	305	89	70	401	123	485	84	144	47	74	352
-51	103699	92113	97816	110130	53	348	74	96	423	127	497	92	115	53	88	300
-50	103573	92263	98467	109595	51	336	73	88	425	102	470	83	129	45	65	356
-49	102964	91983	98424	110496	58	293	97	83	451	124	457	80	129	50	79	328
-48	103083	91919	98831	109996	52	314	88	79	458	124	519	89	122	40	85	344
-47	103230	91584	98830	110240	51	333	84	74	447	133	549	101	126	42	87	313
-46	102869	91231	98622	111157	50	308	76	88	492	118	496	86	125	39	73	309
-45	102237	91755	99534	110334	59	296	81	96	436	133	497	101	151	51	76	350
-44	101797	91178	100015	110843	34	333	61	96	439	131	521	104	143	41	81	318
-43	102163	90867	100098	110671	46	324	67	73	428	110	489	99	118	53	55	344
-42	101396	90879	99848	111655	44	321	88	94	416	125	511	93	133	46	76	358
-41	101456	90931	100741	110709	51	332	77	98	452	108	490	93	141	47	78	347
-40	101572	90476	100723	111067	39	300	77	91	458	129	468	75	135	46	97	314
-39	101000	90781	100406	111650	42	318	61	84	454	125	459	82	120	45	80	341
-38	100941	90711	101195	110920	46	328	79	88	467	124	512	90	138	48	75	325
-37	100377	90696	101416	111261	60	356	86	85	440	129	486	82	137	49	76	342
-36	100123	91056	100956	111626	52	337	66	82	458	113	504	87	142	41	70	348
-35	100093	90706	101322	111649	48	339	73	108	427	126	498	90	140	47	63	351
-34	99215	90856	101862	111872	53	322	90	96	420	108	507	95	132	47	77	347
-33	99731	90515	102313	111236	46	338	81	90	469	132	487	89	133	52	65	344
-32	99145	90777	102063	111817	46	331	78	102	466	129	459	99	108	40	62	360
-31	99359	90547	102335	111519	52	320	79	97	437	120	482	88	138	58	81	356
-30	98412	90706	102912	111737	38	352	86	99	445	124	488	79	111	41	74	336
-29	98655	90720	103204	111223	45	351	85	81	499	141	470	90	151	36	68	324
-28	99203	90356	102900	111388	68	344	75	81	493	123	510	99	124	35	71	338
-27	98568	90573	103195	111511	42	346	73	101	453	129	516	99	128	51	80	334
-26	98158	90801	103476	111454	31	347	70	83	493	135	494	96	135	50	87	328
-25	97657	90660	104002	111473	42	359	86	77	467	121	486	89	125	55	80	307
-24	97781	90900	104067	111028	52	319	76	89	458	118	521	100	120	49	55	345
-23	97419	90667	104399	111256	54	310	90	89	461	114	523	90	130	51	80	326
-22	97466	90908	104132	111248	48	345	75	86	443	117	488	102	124	51	87	341
-21	97103	90338	104760	111623	41	365	76	90	448	130	515	87	132	38	89	363
-20	96569	90801	104636	111720	39	350	65	96	435	121	485	105	116	34	72	351
-19	96592	90732	105030	111343	48	321	86	93	447	130	419	105	139	45	69	338
-18	96275	91357	105241	110816	46	325	89	86	486	134	530	88	130	34	73	363
-17	95996	91478	104955	111258	47	324	84	87	478	103	495	81	134	36	73	337
-16	96175	91431	105841	110271	41	343	84	86	449	116	533	93	120	41	72	324
-15	95974	91402	106085	110239	46	352	86	96	514	115	478	83	120	51	70	342
-14	95228	91478	106368	110618	47	321	84	101	489	113	539	93	135	42	69	318
-13	95410	91447	106365	110496	46	366	69	77	466	138	508	90	120	46	80	371
-12	95198	91984	106757	109752	40	325	86	83	492	110	531	80	115	43	62	375
-11	95293	91246	106983	110197	44	332	93	89	498	136	493	91	120	32	82	369
-10	94863	91749	107145	109977	40	341	55	102	460	113	474	93	119	45	83	352
-9	95005	91587	107024	110151	46	359	70	119	452	129	488	99	111	48	63	340
-8	94010	92278	107324	110050	44	327	77	88	487	127	491	84	111	44	68	347
-7	93840	92252	108094	109426	39	329	73	97	473	122	450	94	134	36	78	361
-6	93735	92874	107575	109521	47	332	80	91	444	135	447	77	130	42	63	318
-5	93859	92707	107656	109478	37	315	67	86	519	110	491	91	117	45	74	336
-4	92913	93230	108160	109402	43	355	82	88	490	128	500	86	127	50	69	339
-3	93575	92302	108338	109433	45	323	81	87	469	134	475	98	116	52	77	340
-2	93311	92594	108921	108879	42	341	84	81	462	127	465	104	132	41	86	367
-1	93152	92865	108358	109333	48	365	90	106	483	149	468	74	128	44	66	360
0	92752	93295	109042	108660	38	316	88	74	468	134	491	96	140	37	77	373
1	93001	92844	108931	108962	51	323	58	97	443	129	477	88	146	46	79	370
2	92950	93325	108974	108486	34	357	76	96	447	138	506	81	125	41	77	350
3	92298	93642	109167	108574	47	352	95	87	496	110	485	86	109	49	73	341
4	92482	93855	109309	108054	36	341	79	97	490	119	502	106	135	43	77	327
5	92085	93859	109434	108274	49	312	75	77	463	117	467	92	118	34	82	341
6	92040	94268	109714	107644	38	299	81	88	528	124	455	91	123	43	71	349
7	92034	94598	109441	107619	47	362	87	110	487	110	495	98	147	43	79	329
8	91730	94136	110176	107600	32	317	71	89	462	132	472	90	135	35	72	351
9	92280	94958	109667	106791	32	344	65	87	475	138	426	93	120	49	72	332
10	91687	94485	110144	107354	51	352	85	83	466	138	511	105	120	48	83	358
11	91843	94998	109979	106948	41	343	82	96	465	120	497	76	109	51	94	327
12	90987	95492	110408	106763	43	350	81	70	521	144	479	72	122	53	103	358
13	91188	95481	110169	106842	46	330	92	104	506	137	460	100	124	40	72	359
14	91268	95858	110317	106247	46	397	74	91	505	142	454	95	118	49	75	304
15	90526	95794	110991	106385	40	338	88	87	481	148	519	92	151	37	58	382
16	90972	96236	110382	106163	37	357	72	92	522	132	460	109	135	44	72	308
17	90627	96736	111058	105307	47	318	70	96	483	117	442	81	123	40	70	337
18	90827	96731	111234	104960	56	326	88	96	498	124	448	86	121	40	79	349
19	90423	96924	110940	105420	45	342	65	118	433	118	479	91	124	44	75	327
20	90978	96497	110701	105533	49	367	81	92	510	121	485	98	131	43	75	367
21	90829	96748	111077	105054	37	311	91	88	517	114	480	86	124	39	84	367
22	90581	97367	111347	104534	42	355	66	80	494	148	421	84	122	44	70	344
23	90804	97524	111652	103877	48	336	72	81	495	147	471	84	113	42	74	344
24	90311	97692	111309	104500	43	341	81	80	492	118	474	87	130	43	77	332
25	90461	97690	111647	104084	45	329	85	99	519	112	470	99	120	41	81	330
26	90699	98515	110998	103619	57	382	64	86	521	111	433	92	147	49	85	368
27	90004	98677	111438	103701	52	366	82	88	494	141	466	96	141	44	79	333
28	90244	98803	111499	103278	57	339	79	112	473	122	443	83	131	43	77	338
29	90352	99293	111071	103079	40	353	80	84	469	129	481	82	118	43	67	338
30	90311	99012	111523	102913	48	341	78	94	525	109	488	86	116	48	73	322
31	90405	99462	111214	102720	41	362	81	120	441	122	436	98	98	40	80	309
32	90763	99908	111064	102111	54	319	94	91	514	158	445	86	112	35	79	316
33	90238	99839	111780	102004	37	333	79	93	469	136	447	99	128	52	71	308
34	91001	100094	111508	101249	34	350	69	117	447	123	423	90	136	49	74	389
35	90669	100300	111657	101193	47	336	73	85	480	142	440	88	130	52	76	332
36	90914	100179	111271	101497	44	349	77	71	457	130	462	108	140	51	76	325
37	89943	101479	111262	101147	45	345	73	83	478	125	484	83	132	46	82	341
38	90511	101197	111113	101028	44	330	79	90	490	107	466	92	115	34	89	307
39	90930	101595	110634	100641	45	319	81	89	493	133	442	93	123	57	81	328
40	90373	101472	111022	100991	54	342	63	72	502	129	442	87	133	51	79	336
41	90881	102157	110423	100356	45	332	66	103	504	126	476	101	129	54	79	327
42	90932	101372	110767	100723	43	355	63	83	513	127	431	81	111	43	86	356
43	91378	102349	110566	99522	48	343	79	107	492	130	467	94	113	47	96	362
44	91172	102228	110490	99938	47	357	71	110	514	126	455	91	119	42	77	350
45	92056	102184	110415	99179	41	279	90	98	482	128	452	83	122	61	77	354
46	91206	102955	109812	99711	47	347	84	82	514	113	466	94	119	40	92	352
47	91714	102221	110218	99607	49	346	75	89	456	109	443	88	111	56	79	294
48	91665	103412	109886	98818	47	360	80	95	492	115	418	75	125	56	91	342
49	92266	103756	109442	98291	31	323	72	92	474	132	463	97	108	61	69	303
50	91904	103220	109853	98802	47	338	93	102	506	120	487	99	119	46	77	345
51	91903	104004	109774	98096	49	326	63	86	515	122	449	92	141	46	79	337
52	92319	103731	109623	98045	60	326	68	99	460	122	428	92	142	47	95	334
53	92269	104875	108725	97812	59	329	83	103	500	118	455	99	128	50	74	332
54	92334	104484	108880	97979	50	302	60	80	499	127	447	87	138	48	89	305
55	92526	104563	108677	97890	45	312	71	99	501	140	437	97	122	51	77	354
56	93188	104605	108588	97261	56	326	89	107	474	118	461	100	134	51	75	327
57	92544	105367	108918	96802	41	349	87	107	490	111	438	91	94	44	78	306
58	93728	105035	108767	96153	49	294	80	99	464	128	436	97	163	48	85	315
59	93821	105786	107660	96383	49	332	71	71	469	132	445	97	123	53	87	303
60	93422	105791	108142	96244	49	296	92	68	514	122	459	90	112	49	109	307
61	94099	105456	108071	95978	49	304	66	109	472	128	476	94	113	54	85	332
62	94552	105850	107840	95346	57	333	91	96	490	104	440	85	112	46	87	338
63	94206	106795	107181	95369	49	295	91	89	503	124	466	89	115	37	80	301
64	94930	106815	106627	95162	51	342	84	105	459	122	416	97	144	40	85	306
65	94764	107160	106542	95115	60	334	72	94	459	130	447	89	105	59	93	311
66	95430	107097	106531	94463	54	322	83	90	483	115	429	95	122	40	83	318
67	95010	107264	106857	94447	56	356	74	92	491	118	454	93	125	51	90	311
68	95654	107391	106466	94021	46	309	76	89	456	118	475	107	122	60	85	305
69	96002	108064	105721	93723	43	330	68	96	493	136	427	71	126	40	78	294
70	96333	107749	105375	93991	53	347	73	91	489	120	420	85	127	46	87	311
71	96542	107942	105147	93846	52	338	63	93	536	123	449	96	108	46	81	342
72	96836	107805	104965	93829	60	349	87	85	457	120	417	100	101	48	71	311
73	97366	108154	104505	93363	63	334	84	81	505	125	426	89	112	45	80	300
74	97242	108581	104455	93081	62	350	76	95	471	106	483	108	113	43	88	316
75	97051	108870	104015	93320	71	302	71	93	494	120	437	86	124	52	83	350
76	97947	108548	103228	93516	49	337	78	114	432	121	450	94	131	49	84	314
77	97955	108332	103729	93276	49	333	66	104	468	129	425	87	102	63	86	326
78	98646	108633	103082	92854	43	327	81	108	448	126	446	90	104	48	70	285
79	98793	108907	102501	92993	56	319	80	89	441	135	419	82	112	54	76	347
80	99217	109094	101612	93224	47	334	74	97	532	121	474	86	127	56	80	352
81	98514	108745	101969	93933	47	302	74	76	473	122	457	118	117	48	87	311
82	99523	108445	101700	93409	57	306	79	85	495	113	446	84	123	45	74	311
83	100176	108488	101764	92603	55	361	82	84	490	106	451	116	102	49	98	295
84	100055	108786	101109	93012	45	308	76	93	428	114	430	96	97	48	77	316
85	100599	109207	99838	93306	51	316	83	99	421	126	483	86	128	52	75	315
86	100000	108764	100665	93486	60	311	83	95	500	112	469	81	107	52	65	326
87	100712	108517	99988	93675	48	302	79	94	468	133	451	99	111	55	87	318
88	100776	108191	100300	93615	59	284	77	91	470	109	441	98	102	60	84	329
89	101301	108423	99935	93244	62	326	85	97	416	109	452	90	106	61	81	284
90	101083	108559	99177	94028	49	294	77	90	423	89	477	109	116	61	69	312
91	101339	108940	99109	93475	68	344	95	102	470	111	431	92	93	50	79	309
92	100989	108540	99361	93978	43	306	76	92	444	129	453	101	111	54	68	313
93	101253	109124	98508	93979	51	328	89	91	400	118	445	95	102	55	81	310
94	101458	108372	98909	94077	48	322	81	89	445	117	448	85	110	64	80	307
95	101879	108491	98806	93600	64	308	73	92	467	112	438	89	127	40	66	322
96	101989	107993	98495	94232	65	301	79	107	454	108	443	93	105	59	76	322
97	101311	108449	98611	94369	59	323	79	83	469	98	414	99	118	53	83	323
98	102112	108195	98350	94069	55	292	105	96	429	127	438	94	109	55	67	293
99	102047	108239	97694	94685	43	326	70	74	436	111	436	105	127	58	64	351
100	102533	108376	97825	93916	59	323	73	94	436	115	417	81	103	71	90	316
101	102363	108008	97440	94728	63	325	65	95	432	120	409	86	118	58	96	283
102	102312	107702	97805	94755	50	326	69	109	388	124	487	85	109	51	77	296
103	102531	108079	97244	94790	57	354	88	91	432	121	434	92	120	52	87	330
104	102249	107951	97486	94884	50	349	88	90	450	107	437	103	132	55	76	351
105	102479	107966	97122	94966	67	358	78	78	458	99	437	97	140	51	79	330
106	102595	108026	97171	94743	69	315	92	112	451	108	430	104	101	67	70	306
107	103125	107264	97339	94746	56	292	71	83	437	110	424	87	92	69	76	329
108	102508	107541	97714	94746	45	275	76	91	444	120	422	101	111	50	80	296
109	102940	107213	97664	94720	52	288	84	85	499	125	452	108	123	52	84	352
110	102860	107549	96800	95258	54	339	75	87	431	115	428	108	130	46	83	283
111	102909	107818	96562	95243	50	298	86	83	421	118	395	88	136	70	72	329
112	102434	107818	96881	95379	52	340	77	89	449	101	448	95	118	55	77	304
113	102820	107646	96580	95393	48	317	81	85	432	107	439	88	106	52	97	320
114	102921	107000	97236	95278	62	307	77	98	450	117	435	91	113	45	75	291
115	103194	107204	96808	95274	62	336	91	91	440	129	405	90	115	42	73	364
116	103251	106992	96337	95850	49	321	81	84	406	118	473	96	89	57	76	311
117	103351	107153	96538	95384	53	343	76	102	443	125	413	94	79	61	78	300
118	103802	107171	96254	95203	44	350	78	94	399	105	450	98	106	58	88	338
119	103910	106562	96173	95751	54	312	76	96	432	116	425	96	126	53	85	354
120	103811	107012	95856	95637	50	364	89	105	417	108	425	115	123	64	74	345
121	103657	107082	95929	95659	65	340	98	91	410	105	431	79	110	54	86	307
122	104114	107135	95602	95439	61	353	60	86	395	110	419	94	95	56	79	296
123	103745	106376	95994	96232	67	324	94	94	412	112	422	93	117	54	93	342
124	103867	106561	95722	96190	44	309	73	78	423	104	397	100	111	48	71	319
125	103416	106540	96407	95980	50	325	78	76	424	100	426	120	113	53	74	333
126	104171	105989	95781	96404	64	335	79	77	444	99	435	98	110	57	75	321
127	104488	106210	95614	96008	54	306	96	82	409	102	421	88	125	70	83	300
128	104264	105951	95751	96347	52	311	83	96	438	108	461	87	124	49	82	325
129	104288	105776	96105	96197	62	328	76	95	394	127	436	90	105	47	74	330
130	104047	106352	95966	95980	60	308	83	93	432	114	453	94	120	57	86	343
131	104074	106351	95660	96326	44	312	77	86	421	125	452	88	110	58	74	309
132	103854	106468	95996	96077	61	312	80	77	420	115	457	88	100	55	90	334
133	104112	106277	95521	96413	58	292	87	88	477	124	451	85	102	52	76	344
134	104128	105920	95557	96756	56	353	86	92	407	117	445	78	124	44	86	335
135	104592	105792	95707	96164	43	324	79	103	395	110	444	105	99	46	77	332
136	104022	105909	95608	96715	52	322	84	94	413	124	422	79	112	51	66	313
137	104253	105660	95423	96875	56	316	76	92	405	116	447	91	110	38	70	337
138	104518	105368	95297	97064	67	326	89	85	427	114	423	83	95	50	81	329
139	104488	105295	95543	96880	48	300	88	93	442	111	405	78	83	44	80	358
140	104138	105398	95509	97249	55	338	83	98	419	90	466	89	113	52	71	345
141	104125	105055	95734	97381	56	316	75	108	390	115	445	88	97	49	77	306
142	104143	104773	96117	97222	48	287	80	83	439	102	415	87	119	41	75	345
143	104437	104848	95698	97222	46	325	95	93	440	113	448	91	101	52	72	334
144	104739	104704	95361	97458	62	325	71	78	449	133	368	93	110	48	77	311
145	104350	104884	95524	97509	52	308	87	89	430	97	442	94	94	59	68	322
146	104049	104592	96324	97233	53	331	93	97	437	120	426	95	112	54	75	314
147	104047	104697	95837	97559	52	340	84	79	442	120	449	94	122	54	96	323
148	104146	104755	95931	97319	70	350	86	94	412	105	477	103	109	44	86	338
149	104084	104936	95420	97828	57	311	79	100	434	104	407	119	128	52	84	316
150	104337	104416	95553	97882	56	322	92	113	434	101	408	108	121	58	76	304
151	104303	104402	95814	97730	59	338	73	99	426	97	484	67	111	54	92	320
152	103940	104124	96001	98152	51	343	79	106	425	107	473	97	101	43	84	332
153	103826	104500	96367	97489	64	361	80	77	446	94	431	94	89	55	67	305
154	104075	105072	95617	97438	55	299	78	86	416	94	458	101	122	54	85	298
155	104068	104318	95933	97928	62	317	81	106	450	110	449	101	114	65	70	313
156	104129	104614	96035	97477	54	321	76	116	429	96	423	97	116	67	81	334
157	104217	104324	95978	97656	55	324	96	87	425	106	408	99	117	48	76	328
158	103599	104045	96705	97740	54	317	87	94	428	121	446	104	97	59	77	314
159	103796	104072	96216	98026	44	355	70	94	426	114	470	108	97	44	78	334
160	103136	104356	96668	97954	54	311	75	93	464	107	424	89	117	57	78	307
161	103911	103692	95911	98565	54	308	80	93	441	122	447	109	101	52	68	311
162	103633	103645	96661	98131	59	342	95	103	464	117	425	90	107	59	79	309
163	103339	104282	96576	97866	52	331	75	99	408	118	439	94	118	55	82	336
164	103082	104084	96473	98429	53	305	61	81	444	109	471	83	104	53	93	335
165	102838	104403	96697	98171	48	314	91	74	434	114	425	77	120	48	79	336
166	103315	103689	96877	98268	62	329	74	86	437	107	446	93	108	40	63	332
167	103625	103768	97116	97599	48	333	78	95	467	105	431	90	104	53	78	318
168	103742	103971	96500	97947	55	347	90	76	403	109	430	80	105	70	79	306
169	102966	103906	97055	98196	59	358	72	98	450	121	431	102	126	54	61	351
170	103376	103523	97187	98067	69	307	80	97	420	119	408	92	118	46	77	359
171	102903	103709	97055	98489	58	338	63	84	401	92	450	96	118	46	76	315
172	102807	103629	97090	98662	55	325	95	90	425	121	508	74	121	67	75	332
173	103054	103837	96590	98615	65	327	87	91	421	108	401	77	112	57	78	350
174	103286	103431	97115	98288	69	317	90	105	392	108	430	91	123	56	79	325
175	103196	103194	97368	98403	52	325	91	89	414	110	446	113	116	44	81	329
176	103147	103658	97251	98038	66	299	86	81	430	122	432	101	136	58	82	305
177	102725	103784	96953	98622	51	340	76	79	462	128	414	73	108	48	75	319
178	103013	103200	97565	98270	47	302	86	90	404	118	442	104	109	46	87	331
179	103005	103397	97080	98548	57	324	83	62	401	108	427	119	105	62	66	349
180	103315	103293	97415	98114	48	337	71	87	470	114	416	92	93	52	87	278
181	102629	103647	97401	98424	61	339	87	81	424	110	410	89	114	46	94	352
182	102730	103298	97609	98438	57	302	88	92	402	119	464	85	94	47	68	316
183	102190	103634	97834	98411	51	337	81	83	420	105	471	115	112	39	68	333
184	102747	103035	97829	98493	42	354	87	100	395	113	463	79	117	42	76	325
185	102079	103672	97888	98470	59	339	102	110	475	99	416	96	95	71	87	340
186	102607	103407	97873	98220	60	333	81	96	471	133	399	100	93	60	81	316
187	102414	103123	97617	98929	54	320	71	105	444	106	457	101	104	54	70	346
188	102050	103369	98054	98682	54	336	91	93	436	108	450	86	109	60	81	305
189	102615	102998	98063	98367	51	328	75	98	461	110	436	86	105	57	70	320
190	102412	103339	97922	98372	46	313	87	107	463	120	409	104	121	46	69	325
191	102637	103252	97850	98351	55	329	84	84	438	127	433	128	123	63	79	303
192	102330	102804	98341	98583	49	321	86	91	426	96	457	91	114	53	80	328
193	102448	103085	97862	98647	59	309	81	92	492	111	497	91	118	54	87	335
194	102387	102723	98441	98505	45	327	75	86	427	117	418	104	106	53	96	323
195	102176	103265	98406	98217	52	329	70	94	409	126	446	101	101	50	79	348
196	102043	102999	98340	98598	51	324	72	79	454	99	461	76	106	53	75	347
197	101744	103584	98977	97707	59	293	77	94	455	117	442	86	114	57	82	327
198	101809	103170	98951	98066	52	347	90	84	426	109	459	100	120	56	77	313
199	102325	103225	98420	97978	65	322	92	98	472	115	445	106	123	60	83	328
200	102112	102918	98521	98462	50	344	82	91	452	114	445	72	93	43	78	321
201	102037	103584	98357	98026	54	332	92	106	432	101	495	92	115	66	93	315
202	101943	103207	98587	98224	39	338	94	98	448	119	436	88	119	55	78	344
203	102256	103013	98455	98229	56	335	98	115	427	99	430	79	102	61	78	331
204	102563	102823	98408	98187	53	303	87	93	440	119	446	95	126	60	87	345
205	102125	103123	98443	98264	60	301	88	83	492	112	459	89	123	55	75	337
206	102271	102863	98841	98015	45	326	82	100	444	116	413	97	110	59	110	346
207	102191	103363	98611	97811	46	334	88	78	474	121	420	91	106	57	90	321
208	101863	103294	98655	98013	56	328	85	92	463	119	451	94	107	58	65	332
209	101807	102702	99033	98325	55	345	70	99	465	128	459	81	122	53	71	322
210	102058	103620	98794	97354	52	304	96	82	474	131	452	88	103	59	78	340
211	101771	103266	98633	98145	56	313	83	81	457	97	431	75	134	50	78	334
212	101825	103192	98862	97965	45	299	82	104	456	120	455	102	119	56	87	306
213	102147	103624	98429	97691	54	329	84	92	459	107	449	96	119	52	92	309
214	101793	102980	98924	98166	53	324	85	73	449	127	420	99	122	45	83	315
215	102224	102884	98813	97908	63	329	89	91	447	113	447	95	95	54	73	349
216	101794	103617	99155	97223	51	310	75	94	454	128	448	102	114	47	83	351
217	101214	103791	98661	98096	52	329	67	110	432	129	476	77	117	56	95	335
218	102116	103287	98701	97636	52	346	70	79	422	116	441	104	108	50	73	332
219	101930	103203	98768	97874	58	314	75	93	436	104	450	95	106	62	96	336
220	102003	103002	98901	97880	54	338	101	86	434	115	422	109	129	54	77	343
221	102064	102956	98625	98057	45	325	86	93	483	120	441	84	121	59	73	348
222	102374	103549	98222	97590	53	334	96	91	462	108	462	74	106	63	84	339
223	102005	103198	98656	97859	46	339	79	96	459	109	461	105	109	63	70	319
224	102028	103055	98822	97722	59	332	107	118	450	124	426	95	127	42	97	362
225	101845	103606	98544	97572	53	319	108	92	471	118	444	78	121	46	72	314
226	101461	103132	99344	97650	46	313	93	94	469	107	443	97	117	63	80	322
227	102437	102889	98527	97742	45	302	87	106	438	127	457	95	125	51	84	338
228	101954	103184	98737	97814	53	315	86	106	463	116	448	93	123	56	78	306
229	102121	102947	98257	98367	52	336	87	85	468	103	452	85	125	64	74	329
230	102053	103419	98266	98015	61	319	86	84	462	113	465	92	110	56	88	350
231	102102	103544	98329	97652	45	328	67	105	432	87	460	91	128	56	75	336
232	102047	103624	98065	97890	55	312	79	76	465	117	456	86	114	49	81	349
233	102328	103582	98225	97463	52	342	83	86	452	115	429	95	121	40	81	343
234	101824	103250	98605	97838	45	333	89	83	484	115	429	89	99	45	77	316
235	102002	102974	98233	98376	48	342	66	100	457	120	458	93	128	42	78	320
236	102213	102679	98314	98362	57	300	73	87	446	107	461	90	120	51	86	326
237	102460	103094	98382	97620	58	340	80	99	412	113	478	99	130	54	80	327
238	101922	103108	98662	97887	59	325	82	97	419	99	437	99	108	63	85	335
239	101986	103649	98536	97436	52	349	85	96	489	117	455	88	123	66	72	350
240	102298	103185	98491	97615	59	356	88	92	455	113	421	110	108	55	82	347
241	102541	103491	98113	97444	53	329	77	115	439	108	475	90	108	49	86	335
242	101785	103643	98180	98012	49	352	87	87	489	129	446	91	108	59	86	321
243	102149	103390	98461	97594	51	327	89	91	447	116	456	101	134	64	62	376
244	101672	103541	98691	97625	51	324	64	85	481	123	451	91	109	81	81	319
245	102297	103020	98292	97885	62	336	79	102	511	103	480	87	100	58	67	308
246	102392	103457	97971	97621	61	349	77	107	454	105	483	90	114	61	72	329
247	101790	103401	98470	97782	50	346	78	88	440	108	457	116	116	65	78	337
248	102006	103446	98717	97316	56	300	80	113	494	127	462	94	121	50	92	313
249	102038	103337	98227	97865	56	310	96	87	444	102	477	88	135	62	73	281
250	101899	103392	98316	97956	58	341	72	68	459	128	484	58	115	44	75	328
251	101890	103949	97899	97785	47	346	73	82	463	131	481	109	113	53	56	307
252	101887	103690	98393	97534	50	335	74	82	480	101	483	99	112	51	73	324
253	102607	102826	98450	97572	56	343	89	98	441	109	461	105	100	60	74	318
254	102184	103589	98045	97602	56	334	72	108	408	138	461	102	120	56	88	316
255	102160	103071	98478	97756	45	318	75	90	442	110	486	94	105	54	79	338
256	102013	103952	97991	97471	62	328	73	97	423	117	482	96	105	58	83	330
257	102528	103079	98561	97223	57	358	92	117	459	128	426	106	130	57	78	329
258	102173	103793	97743	97711	54	330	95	94	461	125	490	108	114	54	76	347
259	102772	102906	97780	97973	53	321	83	83	475	102	434	87	116	50	110	354
260	101797	103304	98083	98209	53	332	88	86	468	121	481	109	116	64	83	343
261	101849	103589	98285	97677	65	349	90	86	510	112	455	97	116	43	75	337
262	102177	103018	98026	98155	48	330	88	95	437	118	462	98	91	53	65	331
263	102317	103441	97669	97967	59	357	91	102	456	118	468	103	123	48	85	324
264	102137	103495	97784	97989	52	321	73	81	457	126	423	113	105	64	81	331
265	102195	103405	98073	97859	55	334	77	101	442	108	430	103	140	53	78	365
266	102284	103081	98443	97687	59	338	68	104	422	128	473	86	121	38	76	330
267	102413	103101	97644	98231	67	347	96	101	457	122	475	91	108	55	70	324
268	102544	102851	97842	98149	55	367	96	102	446	123	460	114	120	52	76	323
269	102125	103854	97883	97593	39	350	85	104	449	101	474	98	124	42	100	380
270	102248	103417	97783	97928	67	340	84	75	471	117	465	84	145	53	76	350
271	102892	103053	97687	97758	53	299	87	104	420	119	466	106	105	68	80	367
272	102148	103079	98119	98123	53	322	85	101	430	121	455	99	121	55	84	284
273	102833	103261	97808	97502	68	306	78	85	488	100	463	109	107	62	85	362
274	102267	103674	97914	97502	47	315	70	80	459	128	452	104	118	55	92	321
275	102061	103136	97896	98360	51	317	60	87	487	118	448	92	109	50	72	330
276	102693	103745	97097	97868	52	335	85	99	434	108	448	81	109	51	75	333
277	102331	103338	97889	97843	49	340	86	98	435	144	465	104	124	42	90	338
278	101979	103346	98208	97802	49	309	83	84	437	109	459	106	108	51	85	334
279	102574	103293	98054	97410	50	341	83	89	410	111	472	90	120	52	74	334
280	102605	103518	97463	97780	44	318	72	102	467	121	466	90	124	51	75	325
281	102332	103665	97708	97601	60	328	84	100	439	100	458	78	121	52	85	320
282	101606	103378	97946	98418	43	345	77	99	464	110	410	98	111	60	75	302
283	102067	103933	97827	97475	54	366	89	108	431	120	444	81	93	57	90	335
284	102481	103307	97708	97827	48	325	72	113	464	118	473	103	117	61	74	347
285	102742	103204	97560	97867	71	342	76	90	442	126	444	77	94	43	84	374
286	102341	103472	97681	97914	63	331	92	80	466	104	431	102	119	49	96	346
287	102373	103449	97714	97827	55	319	62	86	464	100	439	118	118	55	83	327
288	102065	103882	97535	97873	59	333	90	100	466	120	444	85	101	45	96	318
289	101882	103872	97405	98170	43	329	75	81	428	120	396	95	103	49	68	299
290	102191	103342	97444	98376	59	327	81	91	453	118	457	93	115	60	81	315
291	102234	103559	97553	98055	61	341	78	77	448	113	493	95	119	57	75	329
292	102133	103361	97567	98287	52	299	79	96	446	102	462	104	110	63	72	335
293	102562	103630	97500	97604	50	320	74	81	486	119	472	105	111	63	87	296
294	102376	103992	97298	97732	58	330	69	97	454	125	498	82	110	48	86	338
295	102710	103526	97452	97672	52	306	78	92	436	114	436	80	93	41	70	355
296	102020	103899	96676	98772	52	329	76	97	444	101	463	88	95	60	75	337
297	102362	104066	96873	98121	53	334	93	81	440	112	436	102	108	64	67	313
298	101884	104293	97325	97838	48	296	95	92	444	101	460	89	112	41	81	358
299	102201	103800	97280	98031	57	312	87	86	455	124	437	97	115	47	83	311
300	102126	103906	97590	97681	57	324	74	86	425	105	499	103	111	57	82	349
301	102413	103874	97383	97657	67	355	85	96	501	117	407	90	99	62	82	350
302	102351	104065	97543	97410	57	324	71	81	441	97	435	89	102	57	74	312
303	101916	104006	97705	97765	56	334	69	92	477	97	465	101	119	49	85	347
304	102349	104131	97397	97487	46	307	92	106	452	111	495	93	101	46	82	317
305	102039	103718	97756	97818	51	331	80	96	466	107	466	92	107	45	83	300
306	102053	104145	97343	97742	53	337	80	73	446	125	452	78	114	53	73	317
307	102166	103344	97623	98120	48	338	84	81	450	118	494	92	113	65	78	318
308	102564	104047	97125	97472	50	356	82	84	436	116	459	94	121	51	76	342
309	102262	104426	96999	97509	55	346	84	95	444	108	467	84	99	55	78	333
310	102597	103792	97369	97488	58	328	96	86	422	133	459	78	103	55	69	315
311	102000	104080	97050	98109	51	339	84	101	435	103	445	92	123	58	85	330
312	102456	104406	97345	97065	52	296	83	88	461	112	432	90	102	50	88	332
313	102434	103909	97328	97561	53	361	98	85	466	109	428	97	106	51	69	326
314	102176	103925	97305	97689	59	317	77	104	500	121	458	81	120	46	86	342
315	102269	104056	97479	97375	50	345	75	88	458	127	445	76	122	57	74	335
316	102497	103719	97509	97463	67	340	80	109	453	106	473	96	118	52	90	276
317	102113	103894	97452	97695	61	318	80	83	488	107	485	106	110	58	82	333
318	102381	104200	97107	97476	54	311	71	97	442	111	435	94	115	56	74	318
319	102622	103799	97489	97269	56	347	84	96	435	119	469	104	117	57	67	327
320	102241	104498	96706	97716	58	319	92	84	449	125	424	92	103	50	78	299
321	101809	104216	97097	98002	50	325	80	89	483	106	433	84	99	48	67	312
322	102078	104294	97015	97691	46	325	84	72	460	96	471	98	95	58	88	338
323	102257	103690	97054	97963	44	346	89	81	451	129	446	93	117	48	87	294
324	102271	103817	97069	97800	47	322	87	89	440	107	463	100	116	63	65	307
325	102027	104093	97228	97669	52	309	82	93	439	104	477	102	105	51	78	294
326	102486	104108	97279	97173	40	327	69	94	441	103	483	78	126	56	89	341
327	102451	104259	97124	97236	56	308	73	89	444	102	438	88	132	61	68	341
328	102346	104579	97251	96870	44	322	88	101	427	93	406	96	117	42	85	322
329	102073	104623	97264	97101	50	309	74	76	410	111	502	99	130	58	67	319
330	102079	104304	97115	97595	52	328	93	99	474	117	432	96	106	55	78	351
331	102399	103870	97033	97758	64	318	78	99	479	94	464	99	101	50	55	276
332	102226	104210	97656	96903	47	304	89	84	440	110	452	83	108	61	79	366
333	102019	104048	97376	97475	55	333	65	107	405	112	455	92	118	54	73	342
334	102502	104335	96706	97303	64	289	70	89	450	106	453	89	114	44	68	338
335	102299	104278	97131	97163	52	330	59	89	462	110	455	83	135	53	84	293
336	102318	104260	96785	97521	50	296	77	92	460	123	436	96	109	53	93	346
337	102617	104278	96734	97272	53	308	74	94	448	111	452	99	104	41	82	357
338	102448	104239	96855	97351	48	329	64	85	493	107	453	94	106	56	95	284
339	102857	104007	96682	97333	57	347	74	103	435	104	486	80	107	59	85	326
340	102345	104625	97056	96792	64	308	70	87	429	108	454	91	109	55	73	359
341	102721	103865	96943	97274	46	358	86	103	484	113	428	88	116	73	79	317
342	102328	104830	96514	97152	61	332	78	104	430	103	479	96	124	48	67	312
343	102624	104092	97136	97006	65	341	76	82	437	107	439	86	115	45	85	310
344	101541	104310	97481	97546	64	300	87	83	426	109	511	70	115	51	74	328
345	102764	104048	97333	96644	54	337	84	96	440	131	456	89	92	57	87	359
346	102163	104099	97518	97136	51	321	73	75	461	120	429	101	102	55	85	339
347	102441	104459	96964	96973	67	338	78	75	427	114	450	90	114	47	85	333
348	102190	104510	97201	96931	52	318	89	87	421	106	469	75	109	48	84	316
349	102522	103799	97029	97468	49	305	69	93	472	127	454	87	107	54	89	348
350	102632	104556	96896	96764	52	338	92	103	464	97	443	83	127	71	82	365
351	102151	104202	97252	97248	56	340	78	97	461	122	476	82	119	60	64	338
352	102299	104017	96961	97606	50	315	92	101	468	107	472	86	119	44	79	291
353	102061	104944	97195	96688	57	353	76	78	446	125	427	95	121	56	79	314
354	102886	104225	97130	96613	68	310	68	101	439	125	459	89	109	46	68	320
355	102445	103953	97469	96901	66	281	79	110	507	101	455	101	110	52	67	360
356	103002	104289	96750	96806	47	323	88	97	427	122	440	89	117	62	83	282
357	102567	104211	96731	97228	52	339	87	94	440	123	408	112	103	62	84	327
358	102301	104379	96789	97309	51	326	83	83	444	102	450	102	106	63	79	313
359	102423	104227	97104	96940	47	339	87	96	471	126	481	98	130	55	81	338
360	102355	104709	97215	96408	54	336	88	101	478	105	389	108	114	37	80	315
361	102543	104135	96887	97074	38	338	85	75	464	119	440	87	121	59	87	346
362	102168	104187	96735	97501	53	344	82	91	473	139	461	93	106	62	69	314
363	102157	103496	97361	97510	55	316	68	94	453	117	489	102	106	63	85	304
364	102283	103897	97463	96879	58	322	74	102	471	124	466	109	127	65	81	357
365	102859	104062	96592	97108	59	302	73	93	455	123	465	93	111	47	76	293
366	102240	103649	96966	97695	49	317	83	103	446	105	447	91	100	61	85	347
367	102433	104236	97140	96733	61	303	83	100	452	113	473	100	112	41	83	309
368	102262	104291	97231	96683	42	319	76	97	500	99	439	94	124	58	85	333
369	102563	104114	96875	96988	54	302	71	90	434	109	474	116	120	71	77	358
370	102375	103653	97121	97370	56	303	75	87	448	118	465	97	123	51	64	352
371	102279	104289	97088	96898	51	352	64	96	467	105	455	93	104	55	73	335
372	103052	104068	96747	96640	48	318	75	99	434	112	493	95	102	51	77	299
373	102811	103777	97029	96934	42	306	87	75	459	87	465	100	127	55	79	319
374	102555	103726	96910	97280	64	324	82	81	443	114	435	108	112	62	78	335
375	102311	104194	97220	96753	72	328	76	101	482	112	461	92	113	59	74	310
376	102457	104332	96717	96966	65	375	66	106	482	116	460	104	109	59	100	308
377	102322	103817	97085	97235	44	333	94	101	455	112	461	91	103	59	73	338
378	102149	104190	96779	97418	54	329	91	97	483	137	491	90	125	56	61	307
379	103257	103642	97018	96598	58	357	81	81	484	112	462	100	105	51	69	365
380	102406	103744	97290	97021	55	337	86	88	441	108	474	101	124	52	81	320
381	102792	103565	97178	96925	54	321	87	97	458	137	481	81	107	50	78	314
382	102812	104016	96897	96670	56	309	82	79	455	97	484	76	122	59	99	302
383	102930	104029	96571	96791	46	330	91	90	449	104	451	102	111	49	85	333
384	102337	103607	97038	97240	68	357	80	91	440	100	478	98	136	64	90	305
385	102730	103121	97516	96815	54	331	92	89	508	121	471	88	110	58	83	326
386	102586	103489	96952	97116	71	371	67	107	478	118	489	96	111	71	88	331
387	102524	103514	97215	96845	44	289	72	96	448	119	455	104	117	59	81	317
388	103442	103846	96275	96507	58	363	80	101	485	108	438	86	116	62	88	308
389	102725	103391	96770	97167	46	320	90	87	499	118	461	86	131	60	81	322
390	102742	103652	96817	96880	53	322	87	99	459	118	471	93	109	63	78	336
391	102458	103350	97210	97117	56	315	73	72	486	117	460	112	90	67	86	337
392	102428	104007	96896	96762	63	304	88	100	433	92	420	85	114	61	77	345
393	102508	103743	97143	96697	70	299	93	85	474	112	471	79	119	51	71	322
394	102362	103466	96983	97304	58	337	65	91	461	118	441	99	113	54	74	347
395	102291	103844	96636	97299	69	337	85	85	443	117	448	84	120	64	78	345
396	102556	103631	96838	97030	59	364	66	101	480	104	443	78	101	50	69	319
397	102819	103122	97140	96963	54	295	85	103	473	135	446	88	107	57	83	336
398	102315	103567	97260	96904	49	319	74	101	463	116	446	90	120	65	80	321
399	102646	103626	97142	96629	50	321	84	85	477	104	454	107	120	55	83	345
400	102610	103574	97169	96689	50	341	94	101	460	130	468	93	120	53	74	334
401	102136	103823	96838	97274	55	321	64	101	470	105	421	102	112	45	88	300
402	102705	103196	97116	97038	47	345	69	94	437	115	474	97	116	48	75	337
403	102596	103282	97131	97006	51	311	83	93	431	93	491	88	106	58	80	335
404	102528	103473	97146	96915	40	331	80	75	458	116	472	87	119	48	86	321
405	102788	103891	96751	96556	62	326	89	91	459	81	469	83	93	55	92	344
406	102580	103329	97110	96916	53	353	81	104	477	111	448	90	118	52	96	341
407	102716	103671	96645	96912	53	317	77	111	440	106	492	94	112	63	77	339
408	102176	103512	96946	97236	59	316	79	86	426	106	451	84	94	55	81	344
409	102875	102990	97179	96895	59	350	82	85	444	117	492	86	131	62	82	326
410	103196	102986	96658	97043	66	313	75	85	447	112	459	86	113	59	84	350
411	102574	103662	96609	97104	53	312	90	103	436	124	456	88	110	52	74	365
412	103323	103138	96936	96588	50	321	78	108	416	109	470	83	117	56	80	331
413	102379	103645	97062	96842	61	337	79	113	457	102	473	83	103	56	83	334
414	102853	102956	97392	96661	51	316	87	96	478	106	470	87	119	57	75	358
415	102679	103106	97104	97009	56	362	91	73	489	118	459	93	122	57	82	329
416	102207	103760	96513	97418	62	332	72	92	463	103	494	103	103	40	78	313
417	102783	103174	97097	96870	53	324	74	84	481	132	474	83	118	48	85	325
418	102740	103388	96654	97027	65	342	83	83	474	103	456	96	109	52	74	300
419	102574	103315	97356	96569	50	308	82	105	466	127	444	74	112	56	88	355
420	103067	103089	96604	97060	52	347	82	99	448	117	450	92	94	59	80	313
421	102910	102950	96818	97019	57	304	83	88	479	103	444	96	119	66	69	326
422	102263	103718	96810	96934	50	325	92	87	457	113	500	102	114	52	74	314
423	102151	103400	96831	97356	62	333	72	95	434	128	459	89	116	57	72	356
424	102204	102996	97329	97217	48	336	85	87	501	121	468	82	107	57	71	327
425	102767	102953	97104	96923	58	312	84	113	458	105	499	91	107	50	70	353
426	102833	103071	96400	97370	67	311	61	87	420	100	499	107	114	56	85	337
427	102974	103597	96534	96557	37	350	93	88	489	108	456	96	109	58	74	312
428	102567	102596	97198	97339	62	318	80	93	450	106	439	87	118	49	75	317
429	103041	103217	96663	96823	48	300	87	72	441	122	498	96	127	54	72	318
430	102387	103195	96939	97175	63	342	79	103	465	119	470	93	110	52	73	296
431	102700	103866	96703	96420	52	307	78	110	470	112	453	95	90	56	77	314
432	103033	103226	96760	96705	49	346	83	98	471	142	440	105	140	46	97	334
433	102251	103444	96954	97064	59	341	89	109	476	116	500	85	116	49	72	319
434	102852	103244	96803	96757	46	337	81	102	448	120	406	93	117	62	95	329
435	102905	102977	96610	97144	52	324	89	92	449	128	476	106	95	47	77	307
436	102853	103075	96758	96898	63	332	71	109	484	125	453	86	118	46	92	332
437	102565	103356	96573	97034	54	341	79	107	426	98	462	102	123	52	100	360
438	102962	102819	96554	97126	59	310	85	86	456	111	445	99	111	58	91	291
439	102385	103884	96382	96915	37	335	73	88	459	109	444	98	132	63	80	332
440	102364	103415	96618	97130	51	332	103	98	457	117	486	98	116	59	90	322
441	103062	103198	96339	96837	50	350	86	84	440	129	448	99	100	45	83	346
442	103008	102694	96804	97007	52	312	83	92	464	104	441	108	113	52	88	315
443	103065	103378	96222	96904	50	357	88	84	453	96	449	96	115	63	62	360
444	102475	103220	96348	97483	41	339	83	88	443	105	456	85	109	54	80	344
445	103444	103180	96449	96469	66	365	76	86	473	97	490	74	102	56	74	323
446	103015	103262	96560	96741	67	325	91	88	453	100	444	104	102	69	92	340
447	102839	103325	96620	96795	50	319	72	102	426	111	441	89	101	65	87	336
448	102844	103406	96546	96775	66	360	78	83	452	115	510	106	116	50	86	314
449	103046	103385	96386	96770	67	360	71	95	443	103	411	92	104	60	89	322
450	102686	102601	96966	97354	59	330	80	96	430	124	464	83	112	54	78	360
451	102754	103372	96574	96886	48	290	64	98	490	104	427	79	137	48	81	314
452	103390	103404	96479	96285	50	333	81	91	433	97	429	97	121	64	74	339
453	102515	103650	96312	97102	59	334	106	87	449	91	465	88	101	46	77	352
454	102522	103376	96290	97383	50	319	79	87	437	125	460	99	107	44	87	321
455	103271	103115	96282	96872	49	323	74	83	453	120	456	92	123	44	61	354
456	102936	103402	96403	96825	53	305	72	84	450	107	437	83	124	60	77	336
457	102927	103378	96831	96426	63	320	80	108	480	118	437	94	108	49	88	342
458	102761	103467	96569	96794	68	353	80	98	483	104	468	84	109	55	91	330
459	102788	103248	96589	96920	67	310	72	94	437	116	476	87	101	64	86	355
460	102652	103442	96650	96787	52	309	75	84	472	126	482	94	107	57	73	316
461	102966	103507	96613	96505	64	300	82	87	447	120	446	74	120	52	98	319
462	102931	103505	96683	96453	50	330	84	77	457	95	472	86	115	60	101	368
463	103082	103281	96891	96378	66	326	75	90	424	107	448	94	102	50	78	359
464	103108	103448	96564	96465	56	340	87	92	431	98	416	88	108	49	68	312
465	103275	102879	96475	96931	69	349	86	86	446	125	466	97	112	63	86	368
466	103145	103455	96270	96755	65	349	86	101	464	124	420	89	106	48	85	322
467	103200	103440	96036	96912	52	287	76	95	468	98	439	85	103	56	86	339
468	103217	103256	96548	96590	57	330	79	90	412	117	475	94	95	48	69	354
469	103199	103912	96099	96372	55	324	97	87	465	108	448	100	126	49	85	318
470	102667	103567	96635	96721	54	330	85	101	471	129	468	89	98	55	83	330
471	103225	103401	96543	96387	48	312	104	95	465	121	426	99	102	54	71	331
472	102628	103509	96642	96793	57	305	86	92	494	115	480	95	91	57	80	297
473	103432	103336	96448	96288	52	340	88	101	449	110	458	105	113	53	95	369
474	102937	103549	96608	96470	62	324	81	82	461	107	432	82	114	55	82	356
475	103292	103424	96309	96538	50	327	77	89	442	114	453	85	126	45	79	345
476	102895	103727	96194	96792	66	311	67	97	429	108	446	89	136	58	81	294
477	103203	103733	96163	96457	54	342	87	70	443	107	470	89	119	51	70	360
478	103505	103479	96179	96431	59	314	66	86	446	122	468	106	108	62	77	357
479	102950	103301	96741	96614	46	304	95	93	413	115	420	104	99	53	83	330
480	103461	103302	96400	96486	67	341	72	94	442	107	436	102	119	44	61	339
481	103391	103613	96097	96558	67	327	80	97	456	116	454	92	112	58	82	317
482	103134	103822	96593	96156	53	325	78	89	469	104	432	96	95	56	79	359
483	103240	103980	96383	95977	50	329	72	106	427	122	425	91	127	51	90	342
484	103361	104194	96175	95861	47	320	76	92	471	119	423	86	122	46	73	365
485	102914	104185	96465	96033	52	345	78	81	423	110	476	98	119	55	80	348
486	103317	103936	95979	96296	61	307	73	96	431	111	445	103	104	55	85	326
487	103230	103592	96312	96373	61	316	75	95	461	108	443	91	91	66	88	335
488	102840	104260	96164	96275	60	349	95	63	474	96	432	92	103	53	78	328
489	103242	103995	96148	96213	46	319	85	92	418	110	467	121	110	64	87	338
490	103406	104011	96053	96034	77	342	81	76	470	121	436	85	113	54	88	337
491	104229	103229	95827	96192	58	332	77	112	446	118	461	96	133	47	78	315
492	102935	103724	96363	96435	61	340	73	100	450	114	461	99	94	58	76	327
493	103099	103657	96618	96056	50	307	97	92	478	105	455	75	115	57	77	336
494	103896	103996	95476	96056	48	318	80	89	465	106	448	93	126	70	66	329
495	103483	103871	96229	95844	67	341	60	86	440	102	462	93	126	49	74	341
496	103367	103477	96489	96141	52	319	82	93	482	107	499	96	108	47	78	347
497	103706	104143	95837	95714	66	365	81	83	459	98	464	87	123	68	92	375
498	103431	103785	95908	96248	52	321	75	84	449	101	471	96	91	48	78	330
499	103703	103812	95370	96508	61	321	89	106	455	116	503	113	118	43	73	322
500	103642	104132	95794	95879	50	335	81	106	461	98	461	93	120	59	73	317
